# Supplementary material for: What is the aetiology of dysnatraemia in COVID-19 and how is this related to outcomes in patients admitted during earlier and later COVID-19 waves? A multicentre, retrospective observational study in 11 Dutch hospitals
Source: PubMed Central journal article supplement — BMJ Open. 2023 Nov 14;13(11):e075232. doi: 10.1136/bmjopen-2023-075232 (PMC10649520; doi:10.1136/bmjopen-2023-075232), 2023-11-14
Supplement: bmjopen-2023-075232.draft_revisions.pdf [file bmjopen-2023-075232.draft_revisions.pdf]

# BMJ Open

BMJ Open is committed to open peer review. As part of this commitment we make the peer review history of every article we publish publicly available.

When an article is published we post the peer reviewers' comments and the authors' responses online. We also post the versions of the paper that were used during peer review. These are the versions that the peer review comments apply to.

The versions of the paper that follow are the versions that were submitted during the peer review process. They are not the versions of record or the final published versions. They should not be cited or distributed as the published version of this manuscript.

BMJ Open is an open access journal and the full, final, typeset and author-corrected version of record of the manuscript is available on our site with no access controls, subscription charges or pay-per-view fees (<http://bmjopen.bmj.com>).

If you have any questions on BMJ Open's open peer review process please email [info.bmjopen@bmj.com](mailto:info.bmjopen@bmj.com)

# BMJ Open

## Outcomes of COVID-19 patients presenting with dysnatremia: an observational study

|                               |                                                                                                                                                                                                                                                                                                                                                                                                                                                                                                                                                                                                                                                                                                                                                                                                                                                                                                                                                                                                                                                                                                                                                                                                                                                                                                                                                                                                                                                                                                                                                             |
|-------------------------------|-------------------------------------------------------------------------------------------------------------------------------------------------------------------------------------------------------------------------------------------------------------------------------------------------------------------------------------------------------------------------------------------------------------------------------------------------------------------------------------------------------------------------------------------------------------------------------------------------------------------------------------------------------------------------------------------------------------------------------------------------------------------------------------------------------------------------------------------------------------------------------------------------------------------------------------------------------------------------------------------------------------------------------------------------------------------------------------------------------------------------------------------------------------------------------------------------------------------------------------------------------------------------------------------------------------------------------------------------------------------------------------------------------------------------------------------------------------------------------------------------------------------------------------------------------------|
| Journal:                      | <i>BMJ Open</i>                                                                                                                                                                                                                                                                                                                                                                                                                                                                                                                                                                                                                                                                                                                                                                                                                                                                                                                                                                                                                                                                                                                                                                                                                                                                                                                                                                                                                                                                                                                                             |
| Manuscript ID                 | bmjopen-2023-075232                                                                                                                                                                                                                                                                                                                                                                                                                                                                                                                                                                                                                                                                                                                                                                                                                                                                                                                                                                                                                                                                                                                                                                                                                                                                                                                                                                                                                                                                                                                                         |
| Article Type:                 | Original research                                                                                                                                                                                                                                                                                                                                                                                                                                                                                                                                                                                                                                                                                                                                                                                                                                                                                                                                                                                                                                                                                                                                                                                                                                                                                                                                                                                                                                                                                                                                           |
| Date Submitted by the Author: | 08-May-2023                                                                                                                                                                                                                                                                                                                                                                                                                                                                                                                                                                                                                                                                                                                                                                                                                                                                                                                                                                                                                                                                                                                                                                                                                                                                                                                                                                                                                                                                                                                                                 |
| Complete List of Authors:     | de Haan, Lianne; Flevo Hospital, Department of Internal Medicine; Medical Centre Alkmaar, Department of Internal Medicine<br>ten Wolde, Marije; Flevo Hospital, Department of Internal Medicine<br>Beudel, Martijn; Amsterdam University Medical Centers, Neurology<br>Olde Engberink, Rik H G ; Amsterdam University Medical Centres, Center of Experimental and Molecular Medicine<br>Appelman, Brent; Amsterdam UMC location University of Amsterdam, Center for Experimental and Molecular Medicine<br>Haspels-Hogervorst, Esther; Martini Hospital, Department of intensive care<br>Rusch, Daisy; Martini Ziekenhuis, Department of intensive care<br>Gritters van den Oever, Niels; Treant Zorggroep, Department of Intensive Care<br>Simsek, Suat; Noordwest Ziekenhuisgroep, Department of Internal Medicine<br>Paternotte, Nienke; Northwest Hospital Group, Pulmonology<br>van den Bergh, Joop; VieCuri Medical Centre, Department of Internal Medicine<br>Wyers, Caroline; VieCuri Medical Centre, Department of Internal Medicine<br>de Kruif, Martijn; Zuyderland Medical Centre Heerlen, Department of Pulmonary Medicine<br>Dormans, Tom; Zuyderland Medical Centre, Department of Intensive Care<br>Moeniralam, Hazra; Sint Antonius Hospital, Department of Internal Medicine<br>Bokhizzou, Neyma; Bovenij Hospital, Internal Medicine<br>Brinkman, Kees; OLVG, Dept of Internal Medicine<br>Douma, Renee; Flevo Hospital, Department of Internal Medicine<br>Collaborator, COVIDPredict Study Group; Amsterdam University Medical Centres |
| Keywords:                     | INTERNAL MEDICINE, COVID-19, SARS-CoV-2, INFECTIOUS DISEASES                                                                                                                                                                                                                                                                                                                                                                                                                                                                                                                                                                                                                                                                                                                                                                                                                                                                                                                                                                                                                                                                                                                                                                                                                                                                                                                                                                                                                                                                                                |

SCHOLARONE™  
Manuscripts

1  
2  
3  
4  
5  
6  
7  
8  
9  
10  
11  
12  
13  
14  
15  
16  
17  
18  
19  
20  
21  
22  
23  
24  
25  
26  
27  
28  
29  
30  
31  
32  
33  
34  
35  
36  
37  
38  
39  
40  
41  
42  
43  
44  
45  
46  
47  
48  
49  
50  
51  
52  
53  
54  
55  
56  
57  
58  
59  
60

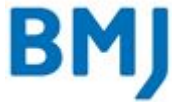

I, the Submitting Author has the right to grant and does grant on behalf of all authors of the Work (as defined in the below author licence), an exclusive licence and/or a non-exclusive licence for contributions from authors who are: i) UK Crown employees; ii) where BMJ has agreed a CC-BY licence shall apply, and/or iii) in accordance with the terms applicable for US Federal Government officers or employees acting as part of their official duties; on a worldwide, perpetual, irrevocable, royalty-free basis to BMJ Publishing Group Ltd ("BMJ") its licensees and where the relevant Journal is co-owned by BMJ to the co-owners of the Journal, to publish the Work in this journal and any other BMJ products and to exploit all rights, as set out in our [licence](#).

The Submitting Author accepts and understands that any supply made under these terms is made by BMJ to the Submitting Author unless you are acting as an employee on behalf of your employer or a postgraduate student of an affiliated institution which is paying any applicable article publishing charge ("APC") for Open Access articles. Where the Submitting Author wishes to make the Work available on an Open Access basis (and intends to pay the relevant APC), the terms of reuse of such Open Access shall be governed by a Creative Commons licence – details of these licences and which [Creative Commons](#) licence will apply to this Work are set out in our licence referred to above.

Other than as permitted in any relevant BMJ Author's Self Archiving Policies, I confirm this Work has not been accepted for publication elsewhere, is not being considered for publication elsewhere and does not duplicate material already published. I confirm all authors consent to publication of this Work and authorise the granting of this licence.

Lianne R. de Haan, MD

Department of Internal Medicine

Flevoziekenhuis

Hospitaalweg 1

1315 RA Almere The Netherlands

lr.de.haan@nwz.nl

Sir Aldcroft

Editor-in-Chief

BMJ Open

***Cover letter for submission of an original article to BMJ Open***

**Almere, April 25th, 2023**

Dear Sir Aldcroft,

On behalf of my co-authors, I am writing to submit our manuscript entitled "Outcomes of COVID-19 patients presenting with dysnatremia: an observational study" to be considered for publication as original article in BMJ Open.

Together with the outbreak of COVID-19, an eruption of research arose focusing on every aspect of the disease. This also applied to the most common electrolyte disorder dysnatremia. Smaller studies performed during the first COVID-19 wave demonstrated that dysnatremia is associated with worse clinical outcomes, such as a higher need for invasive ventilation or intubation and higher mortality rates. However, research on the prognostic value of dysnatremia in later phases of the pandemic is lacking, whereas later phases of the pandemic differ significantly from the start of the pandemic due to evolution of new treatment strategies, a larger number of vaccinated patients, and newer (less pathogenic) SARS-CoV-19 variants. Besides, previous studies did not extensively study the underlying mechanism leading to dysnatremia in COVID-19 patients.

1  
2  
3 In the largest cohort to date with patients included between February 2020 and April 2022, we  
4 demonstrate that hyponatremia is associated with a higher risk of ICU admission, but not with higher  
5 need for invasive ventilation or mortality rates, which is in contrast to previous studies. Also, we show  
6 that hypernatremia is far more predictive for a worse clinical outcome than hyponatremia. Finally, we  
7 provide evidence that hyponatremia most likely results from an absolute shortage due to systemic  
8 complaints such as diarrhea rather than other disease mechanisms such as SIADH.  
9

10  
11  
12  
13  
14  
15  
16  
17  
18  
19  
20  
21  
22  
23  
24  
25  
26  
27  
28  
29  
30  
31  
32  
33  
34  
35  
36  
37  
38  
39  
40  
41  
42  
43  
44  
45  
46  
47  
48  
49  
50  
51  
52  
53  
54  
55  
56  
57  
58  
59  
60

Dysnatremia is a frequent clinical diagnosis, as we have shown: also in COVID-19. Knowledge on the  
etiology and outcomes has clinical implications and may improve patient outcomes. We therefore believe  
that our findings will be of interest to the readers of your journal.

We declare that this manuscript describes recent work and is not under consideration for publication  
elsewhere, nor is it available in pre-print form. The manuscript has been read and approved for  
submission by all coauthors. We included patients from the ongoing CovidPredict clinical course cohort:  
a national database project on COVID-19. Other analyses in this project have been performed and  
published, see also: [www.covidpredict.org](http://www.covidpredict.org) and the list of publications below. A waiver for the use of  
hospital data was obtained from the Medical Ethical Committees of the participating centers (Amsterdam  
UMC; 20.131). Patients were given the opportunity to opt out.

The authors know of no conflicts of interest with this publication and any financial, research, or academic  
organization.

We appreciate your considerations and look forward to receiving any comments from your reviewers.

Best regards,



Lianne R. de Haan, MD

Resident Internal medicine Flevoziekenhuis, Almere, The Netherlands

**Publications from the CovidPredict database:**Outcomes of persons with coronavirus disease 2019 in hospitals with and without standard treatment with (hydroxy)chloroquine.

Peters EJ, Collard D, Van Assen S, Beudel M, Bomers MK, Buijs J, De Haan LR, De Ruijter W, Douma RA, Elbers PW, Goorhuis A, Gritters van den Oever NC, Knarren LG, Moeniralam HS, Mostard RL, Quanjel MJ, Reidinga AC, Renckens R, Van Den Bergh JP, Vlasveld IN, Sikkens JJ; CovidPredict Study Group. Clin Microbiol Infect. 2021 Feb;27(2):264-268. doi: 10.1016/j.cmi.2020.10.004. Epub 2020 Oct 14.

Predicting mortality of individual patients with COVID-19: a multicentre Dutch cohort.

Ottenhoff MC, Ramos LA, Potters W, Janssen MLF, Hubers D, Hu S, Fridgeirsson EA, Piña-Fuentes D, Thomas R, van der Horst ICC, Herff C, Kubben P, Elbers PWG, Marquering HA, Welling M, Simsek S, de Kruif MD, Dormans T, Fleuren LM, Schinkel M, Noordzij PG, van den Bergh JP, Wyers CE, Buis DTB, Wiersinga WJ, van den Hout EHC, Reidinga AC, Rusch D, Sigaloff KCE, Douma RA, de Haan L, Gritters van den Oever NC, Rennenberg RJMW, van Wingen GA, Aries MJH, Beudel M; Dutch COVID-PREDICT research group. BMJ Open. 2021 Jul 19;11(7):e047347. doi: 10.1136/bmjopen-2020-047347.

Pre-admission anticoagulant therapy and mortality in hospitalized COVID-19 patients: A retrospective cohort study.

van Haaps TF, Collard D, van Osch FHM, Middeldorp S, Coppens M, de Kruif MD, Vlot EA, Douma RA, Ten Cate H, Juffermans NP, Gritters N, Vlaar AP, Reidinga AC, Heuvelmans MA, Oudkerk M, Büller HR, van den Bergh JPW, Maas A, Ten Wolde M, Simsek S; Corona Research Fund Amsterdam UMC, Beudel M, van Es N; Dutch COVID & Thrombosis Coalition. Thromb Res. 2021 Dec;208:35-38. doi: 10.1016/j.thromres.2021.10.006. Epub 2021 Oct 15.

Mortality and readmission rates among hospitalized COVID-19 patients with varying stages of chronic kidney disease: a multicenter retrospective cohort.

Appelman B, Oppelaar JJ, Broeders L, Wiersinga WJ, Peters-Sengers H, Vogt L; CovidPredict Study Group. Sci Rep. 2022 Feb 10;12(1):2258. doi: 10.1038/s41598-022-06276-7.

Treatment with a DPP-4 inhibitor at time of hospital admission for COVID-19 is not associated with improved clinical outcomes: data from the COVID-PREDICT cohort study in The Netherlands.

Meijer RI, Hoekstra T, van den Oever NCG, Simsek S, van den Bergh JP, Douma RA, Reidinga AC, Moeniralam HS, Dormans T; Amsterdam UMC COVID-19 biobank study group, Smits MM. J Diabetes Metab Disord. 2021 Jun 26;20(2):1155-1160. doi: 10.1007/s40200-021-00833-z. eCollection 2021 Dec.

Cardiovascular risk factors and COVID-19 outcomes in hospitalised patients: a prospective cohort study.

Collard D, Nurmohamed NS, Kaiser Y, Reeskamp LF, Dormans T, Moeniralam H, Simsek S, Douma R, Eerens A, Reidinga AC, Elbers PWG, Beudel M, Vogt L, Stroes ESG, van den Born BH. BMJ Open. 2021 Feb 22;11(2):e045482. doi: 10.1136/bmjopen-2020-045482.

1  
2  
3 Association of clinical sub-phenotypes and clinical deterioration in COVID-19: further cluster analyses.  
4 Schinkel M, Appelman B, Butler J, Schuurman A, Wiersinga WJ; COVID Predict Study  
5 Group. *Intensive Care Med.* 2021 Apr;47(4):482-484. doi: 10.1007/s00134-021-06363-9. Epub 2021  
6 Feb 18.

7  
8 Overweight and Obesity Are Associated With Acute Kidney Injury and Acute Respiratory Distress  
9 Syndrome, but Not With Increased Mortality in Hospitalized COVID-19 Patients: A Retrospective  
10 Cohort Study.

11  
12  
13 van Son J, Oussaada SM, Şekercan A, Beudel M, Dongelmans DA, van Assen S, Eland IA,  
14 Moeniralam HS, Dormans TPJ, van Kalker CAJ, Douma RA, Rusch D, Simsek S, Liu L, Kootte RS,  
15 Wyers CE, IJzerman RG, van den Bergh JP, Stehouwer CDA, Nieuwdorp M, Ter Horst KW, Serlie  
16 MJ. *Front Endocrinol (Lausanne).* 2021 Dec 14;12:747732. doi: 10.3389/fendo.2021.747732.  
17 eCollection 2021.

18  
19  
20 Real-world Evidence of the Effects of Novel Treatments for COVID-19 on Mortality: A Nationwide  
21 Comparative Cohort Study of Hospitalized Patients in the First, Second, Third, and Fourth Waves in  
22 The Netherlands.

23 Slim MA, Appelman B, Peters-Sengers H, Dongelmans DA, de Keizer NF, Schade RP, de Boer MGJ,  
24 Müller MCA, Vlaar APJ, Wiersinga WJ, van Vught LA; NICE COVID-19 Research Consortium and the  
25 COVIDPredict study group. *Open Forum Infect Dis.* 2022 Nov 22;9(12):ofac632. doi:  
26 10.1093/ofid/ofac632. PMID: 36519114; PMCID: PMC9745783.  
27  
28  
29  
30  
31  
32  
33  
34  
35  
36  
37  
38  
39  
40  
41  
42  
43  
44  
45  
46  
47  
48  
49  
50  
51  
52  
53  
54  
55  
56  
57  
58  
59  
60



# Outcomes of COVID-19 patients presenting with dysnatremia: an observational study

L.R. de Haan<sup>a, f1, \*</sup>, M. ten Wolde<sup>a1</sup>, M. Beudel<sup>b</sup>, R.H. Olde Engberink<sup>c1</sup>, B. Appelman<sup>c2</sup>, E.K. Haspels-Hogervorst<sup>d1</sup>, D. Rusch<sup>d2</sup>, N.C. Gritters-van den Oever<sup>e</sup>, S. Simsek<sup>f1</sup>, N. Paternotte<sup>f2</sup>, J.P. van den Bergh<sup>g1</sup>, C.E. Wyers<sup>g2</sup>, M. de Kruijf<sup>h1</sup>, T. Dormans<sup>h2</sup>, H. Moeniralam<sup>i</sup>, N. Bokhizzoui<sup>i</sup>, K. Brinkman<sup>k</sup>, R.A. Douma<sup>a2</sup>,

<sup>a</sup> *Department of Internal Medicine, Flevo Hospital, Almere, the Netherlands*

<sup>b</sup> *Department of Neurology, Amsterdam University Medical Centre*

<sup>c</sup> *Center of Experimental and Molecular Medicine (C.E.M.M.), Location Academic Medical Center, Amsterdam UMC, Amsterdam, The Netherlands*

<sup>d</sup> *Department of Intensive Care, Martini Hospital, Groningen, the Netherlands*

<sup>e</sup> *Department of Intensive Care, Treant Hospitals, Hoogeveen, Emmen, and Stadskanaal, the Netherlands*

<sup>f1</sup> *Department of Internal Medicine, Northwest Clinics, Alkmaar, the Netherlands*

<sup>f2</sup> *Department of Pulmonary diseases, Northwest Clinics, Alkmaar, the Netherlands*

<sup>g</sup> *Department of Internal Medicine, VieCuri Medical Centre, Venlo, the Netherlands*

<sup>h1</sup> *Department of Pulmonary diseases, Zuyderland Medical Centre, Heerlen, the Netherlands*

<sup>h2</sup> *Department of Intensive Care, Zuyderland Medical Centre, Heerlen, the Netherlands*

<sup>i</sup> *Department of Internal Medicine, St. Antonius Hospital, Nieuwegein, the Netherlands*

*Department of Internal Medicine, BovenIJ hospital, Amsterdam, the Netherlands*

<sup>k</sup> *Department of Internal Medicine, Onze Lieve Vrouwe Gasthuis, Amsterdam, the Netherlands*

\* **Corresponding author:** Lianne R. de Haan, Department of Internal Medicine, Flevoziekenhuis, Hospitaalweg 1, 1315 RA Almere, The Netherlands, E: [lr.de.haan@nwz.nl](mailto:lr.de.haan@nwz.nl), T +316-53853254. Present address: Department of Internal Medicine, Northwest Clinics, Wilhelminalaan 12, 1815 JD Alkmaar, The Netherlands.

## Abstract

### Objectives

To evaluate the relation between dysnatremia at hospital presentation and duration of admission, risk of ICU-admission, and all-cause mortality and to assess the underlying pathophysiological mechanism of hyponatremia in COVID-19 patients. Our hypothesis is that both hypo- and hypernatremia at presentation are associated with adverse outcomes.

### Design

Observational study

### Setting

Secondary care; nine Dutch hospitals (2 university and 9 general hospitals)

### Participants

An analysis was performed within the retrospective multicenter cohort study COVIDPredict. 7811 patients were included (60% males, 40% females) between February 24<sup>th</sup> 2020 and August 19<sup>th</sup> 2022. Patients who were  $\geq 18$  years with PCR-confirmed COVID-19, or CT with COVID-19 reporting and data system score  $\geq 4$  and alternative diagnosis were included. Patients were excluded when serum sodium levels at presentation were not registered in the database or when they had been transferred from another participating hospital.

### Outcome measures

We studied demographics, medical history, symptoms, and outcomes. Patients were stratified according to serum sodium concentration and urinary sodium excretion.

### Results

Hyponatremia was present in 2677 (34.2%) and hypernatremia in 126 (1.6%) patients. Patients with hyponatremia presented more frequently with diarrhea, lower blood pressure, and tachycardia. Hyponatremia was, despite a higher risk for ICU admission (OR 1.27 (1.11-1.46;  $p < 0.001$ ), not associated with mortality or the risk for intubation. Patients with hypernatremia had higher mortality rates

1  
2  
3 (OR 2.25 1.49 – 3.41; p <0.001) and were at risk for ICU-admission (OR 2.89 (1.83 – 4.58) and intubation  
4  
5 (OR 2.95 (1.83 – 4.74)).  
6  
7

### 8 **Conclusions**

9  
10 Hypernatremia at presentation was associated with adverse outcomes in COVID-19 patients.  
11  
12 Hypovolemic hyponatremia was found to be the most common etiology of hyponatremia.  
13  
14  
15  
16

### 17 **Strengths and limitations of this study**

- 18 - This study is the largest study on dysnatremia in COVID-19 so far;
- 19 - This study includes patients from different COVID-19 waves and from multiple hospitals,  
20 resulting in an heterogenous patient population;
- 21 - A relative low number of urinary samples was available for patients with hyponatremia;
- 22 - Different treatment options that became available for COVID-19 during the ongoing pandemic  
23 were not taken into account in thus study, which may have influenced the outcome of patients.  
24  
25  
26  
27  
28  
29  
30  
31  
32  
33  
34  
35  
36  
37  
38  
39  
40  
41  
42  
43  
44  
45  
46  
47  
48  
49  
50  
51  
52  
53  
54  
55  
56  
57  
58  
59  
60

## 1. Introduction

The severe acute respiratory syndrome coronavirus 2 (SARS-CoV-2) has led to a worldwide pandemic from February 2020 onwards. By the time of October 19<sup>th</sup>, 2022, over 621 million cases and 2.9 million deaths due to coronavirus disease 19 (COVID-19), resulting from SARS-COV-2-infection, have been reported globally<sup>1</sup>. The leading cause of mortality due to SARS-CoV-2 is respiratory failure due to acute respiratory distress syndrome<sup>2-4</sup>.

Signs and symptoms as a result of COVID-19 infection vary widely, but fever, cough, and dyspnea are frequently present. Symptoms less common include anosmia, nausea, vomiting, diarrhea, and general illness<sup>2</sup>. Besides these clinical symptoms, several laboratory markers have been found to be indicative for COVID-19 infection. Especially elevated LDH concentration and lymphocytopenia are common<sup>5 6</sup>. Moreover, electrolyte disorders including hypocalcemia, hypokalemia, and dysnatremia (hypo- or hypernatremia) are seen in a substantial proportion of COVID-19 patients at the time of hospital admission<sup>5</sup>. Hyponatremia is also frequently present in other infectious diseases, such as pneumonia, but also in tuberculosis, meningitis, human immunodeficiency virus (HIV) infection, malaria, and leishmaniasis<sup>7</sup>. In COVID-19 patients, an incidence of hyponatremia between 9.9% and 38% has been reported<sup>5 8-10</sup>, as compared to 20-30% in all hospitalized patients<sup>11</sup>. Hyponatremia has been inversely related to clinical outcomes in tuberculosis, pneumonia and HIV<sup>7</sup>, and has also been related to poor outcomes in COVID-19 in retrospective studies during the first COVID-19 wave<sup>12-14</sup>. Hypernatremia is present only in less than 10% (general population) to 38% (intensive care unit (ICU) population) of COVID-19 patients but is associated with adverse clinical outcome<sup>9 13 15 16</sup>.

Hyponatremia in infectious diseases, including COVID-19, can have multiple etiologies but can broadly be classified in two groups based on urinary sodium excretion (USE). In general, low USE (<30 mmol/l) indicates an activation of the renin-angiotensin system (RAAS), e.g. due to hypovolemia resulting from inadequate dietary intake, vomiting or diarrhea. On the other hand, a high USE is indicative for RAAS inactivation, although diagnostics can be influenced by the use of diuretics, which could occur in patients with syndrome of inappropriate antidiuretic hormone secretion (SIADH)<sup>17</sup>. Antidiuretic hormone (ADH) release in infectious diseases has been linked to secretion of inflammatory marker interleukin-6<sup>18</sup>, which is enhanced in COVID-19 patients and is nowadays also the main target

1  
2  
3 for off-label administration of interleukin-6-inhibitors, such as tocilizumab, as treatment for COVID-19<sup>4</sup>  
4  
5 <sup>19</sup>. Both etiologies (hypovolemic hyponatremia and inadequate ADH secretion) have been proposed to  
6  
7 contribute to hyponatremia in COVID-19, although the exact mechanism is still unclear.

8  
9 Hypernatremia mostly results from insufficient water intake, for example due to a defect in of  
10  
11 the hypothalamic thirst center or lack of access to fluid intake, but can also result from diabetes insipidus,  
12  
13 a condition characterized by ADH deficiency or resistance<sup>20</sup>.

14  
15 Previously, hypo- or hypernatremia in COVID-19 patients have been associated with worse  
16  
17 clinical outcome from studies early in the pandemic<sup>12-15</sup>. However, these studies have not reported  
18  
19 clinical parameters at presentation, making it difficult to hypothesize about the underlying etiology of the  
20  
21 hyponatremia<sup>14</sup>. Also, previous studies have shown incidence rates of and outcomes associated with  
22  
23 dysnatremia only from the early months of the pandemic and during this period, interleukin-6 inhibitors  
24  
25 were not yet administered<sup>13-15</sup>.

26  
27 This study reports the incidence rates of hypo- and hypernatremia at the time of admission in  
28  
29 COVID-19 patients from a large multi-center cohort study in The Netherlands including patients from  
30  
31 multiple COVID-19 waves. Our hypothesis is that hyponatremia and hypernatremia predict adverse  
32  
33 outcomes, including admittance to an ICU, the need for invasive ventilation, and mortality rates in  
34  
35 patients hospitalized for COVID-19. Also, we aim to investigate possible underlying pathophysiological  
36  
37 mechanisms based on clinical features and laboratory values at presentation.  
38  
39  
40  
41  
42  
43  
44  
45  
46  
47  
48  
49  
50  
51  
52  
53  
54  
55  
56  
57  
58  
59  
60

## 2. Methods

### 2.1 Patient recruitment and public involvement

We used data from the ongoing retrospective multicenter COVIDPredict Clinical Course Cohort, containing over 6500 patients with COVID-19, recruited between February 24<sup>th</sup>, 2020, and August 9<sup>th</sup>, 2022, in nine Dutch hospitals (2 university and 9 general hospitals). Patients registered in the database when they were 18 years or older, had a positive result for SARS-CoV-2 on polymerase chain reaction (PCR) or had a COVID-19 reporting data system (CO-RADS) score of 4 (abnormalities suspicious for COVID-19) or 5 (typical COVID-19) in the absence of an alternative diagnosis<sup>21</sup>. A waiver for the use of hospital data was obtained from the Medical Ethical Committees of the participating centers (Amsterdam UMC; 20.131). Information on the design and the dissemination plans of our study was included in the information available to the patients on pamphlet, website and orally. Patients were given the opportunity to opt out. Patients who had been transferred from another participating hospital were excluded to avoid double entries (N = 280).

### 2.2 Study design

Included patients were divided into three groups, based on their serum sodium concentration at admission at the participating hospital. Serum sodium concentration was corrected for serum glucose concentration, when available, as was described by Hillier, et al.<sup>22</sup>. Sodium concentrations were stratified in 'normonatremia' (corrected serum sodium concentration (Na) 135-145 mmol/L), hyponatremia (corrected serum sodium concentration (Na) <135 mmol/L), further subclassified as 'mild' (corrected serum sodium concentration Na 131-134 mmol/L), 'moderate' (corrected serum sodium concentration Na 126-130 mmol/L), 'severe' (corrected serum sodium concentration Na  $\leq$  125 mmol/L) (see supplemental information), and 'hypernatremia' (corrected serum sodium concentration Na  $\geq$  146 mmol/L). Serum sodium concentrations and sodium groups in the text refer to the corrected sodium concentrations unless otherwise indicated. Demographics (ethnicity, sex at birth and age), co-morbidities (according to prespecified groups, see the Supplemental Information), home medication, and presenting signs and symptoms were compared between the groups and between normonatremia and different severity categories of hyponatremia (Supplemental information). Serum concentrations of

1  
2  
3 creatinine, urea, C-reactive protein (CRP), and lactate dehydrogenase (LDH) indicate the measured  
4 value measured at first presentation in the participating hospital. The estimated glomerular filtration rate  
5 (eGFR) was calculated from serum creatinine using the 2021 Chronic kidney disease Epidemiology  
6  
7 Collaboration (CKD-epi) formula<sup>23</sup>. Modified early warning score (MEWS) and quick sequential organ  
8  
9 failure assessment (qSOFA) were calculated based in clinical values measured at presentation. The  
10  
11 following clinical outcome measures were compared between the groups and for the different severity  
12  
13 categories: duration of hospitalization, admission to intensive care unit, invasive ventilation, duration of  
14  
15 ventilation, and death. Also, the different admission-related complications were compared between the  
16  
17 groups.  
18  
19

### 2.3 Statistical analysis

20  
21  
22  
23  
24  
25  
26 All data were analyzed using SPSS version 27. Comparisons were made between hyper-, normo-, and  
27  
28 hyponatremia (main text) and between normonatremia, mild, moderate, and severe hyponatremia  
29  
30 (supplemental information). Baseline numerical data were displayed as median and interquartile range  
31  
32 and analyzed using a Kruskal Wallis test (for non-normally distributed data) or displayed as mean and  
33  
34 standard deviation and analyzed using a one-way ANOVA (for normally distributed data). Baseline  
35  
36 categorical data were displayed as absolute number and percentage of patients with the given condition  
37  
38 and analyzed using a ChiSquare test. Outcome data (risk for ICU-admission, intubation, mortality rates,  
39  
40 and complications) were assessed using a binary logistic regression model with calculation of odds  
41  
42 ratios, adjusted for age, sex assigned at birth (either of two categorizations (male/female) based on  
43  
44 genotype and internal and external anatomy at birth), a history of chronic kidney disease, and a history  
45  
46 of hypertension. Duration of admission was assessed with a simple linear regression. A Cox proportional  
47  
48 hazard regression analysis was conducted to estimate survival for patients presenting with and without  
49  
50 hyponatremia to show the cumulative mortality over a 6-week period starting from hospital admission.  
51  
52 For all statistical testing, a p-value of  $\leq 0.05$  was considered statistically significant. When the tested  
53  
54 variable was not registered in the database, the patient was excluded from the specific analysis.  
55  
56  
57  
58  
59  
60

### 3. Results

#### 3.1 Incidence of dysnatremia at presentation

At the time of August 9<sup>th</sup>, 2022, the database contained 11.382 records. Serum sodium concentrations at admission were available for 8278 (73 %) admissions of 7811 patients (170 double entries due to readmittance: 297 patients had been transferred from or previously admitted to another participating hospital and transfer records were therefore excluded). 6673 patients were included based on a positive result for SARS-CoV-2 PCR and 1138 were included based on a CO-RADS score 4 or 5 in the absence of an alternative diagnosis. When patients were readmitted, the admission with the abnormal sodium level at presentation (in case of hyponatremia or hypernatremia) or the first admission (in case sodium concentrations were normal for both presentations) was included.

Of the included 7811 patients with COVID-19, 2677 (34.3%) presented with hyponatremia (corrected blood serum Na <135 mmol/L), and 126 (1.6%) presented with hypernatremia (corrected blood serum Na  $\geq$  146 mmol/L). Of the patients presenting with hyponatremia, 1957 (25.1%) presented with blood serum Na ranging 131-134 mmol/L ('mild'), 582 (7.5%) presented with blood serum Na ranging 126-130 mmol/L ('moderate'), and 138 (1.8%) with blood serum Na  $\leq$  125 mmol/L ('severe'), Supplemental Figure 1. 1888 patients were included after the start of the SARS-CoV-19 vaccination campaign in the Netherlands (6<sup>th</sup> of January 2021) of whom 445 were vaccinated (N = 319 for two doses or more).

#### 3.2 Patient characteristics of patients presenting with dysnatremia

Table 1 shows the characteristics of patients with hyponatremia and hypernatremia compared to patients presenting with normal sodium concentrations at presentation. Both hypo- and hypernatremia occurred more often in males than in females (Table 1), except for 'severe' hyponatremia (Supplemental Table 2). Mean age in patients with and without hyponatremia differed slightly, where patients presenting with 'moderate' or 'severe' hyponatremia were significantly older (median age 68.1 and 70.6 years). Patients with hypernatremia were also older, with a mean age of 72.5 years. Body mass index (BMI) in



1  
2  
3 patients presenting with hyponatremia was slightly lower than in patients with normonatremia and also  
4 lower in patients presenting with hypernatremia. Abnormal sodium concentration at presentation was  
5 associated with chronic kidney disease. Patients with hyponatremia, especially those with severe  
6 hyponatremia, more often had a history of hypertension, but this difference was not significant for the  
7 subgroup of patients that did not use diuretics (36.4% (normonatremia) vs. 39.1% (hyponatremia);  $p =$   
8 0.003; Chi-square test). Hypo- and hypernatremia were not associated with a history of chronic heart,  
9 pulmonary or liver disease, (see Supplemental Table 1 for definitions). As for the use of medication, the  
10 use of thiazide diuretics (Table 1) was higher in patients with hyponatremia, but the use of diuretics in  
11 general or loop diuretics did not differ between the groups, nor did the use of selective serotonin (and  
12 noradrenalin) reuptake inhibitors (SSRIs/SNRIs). The use of immunosuppressives was also higher in  
13 patients presenting with hyponatremia as compared to people with normal sodium concentration at  
14 presentation.  
15  
16  
17  
18  
19  
20  
21  
22  
23  
24  
25  
26  
27  
28  
29

### 3.3 Signs and symptoms of patients presenting with dysnatremia

30  
31  
32  
33 Patients with hyponatremia more often presented with diarrhea and anosmia compared to patients  
34 without hyponatremia (Table 2) but vomiting or nausea as presenting symptoms were not associated  
35 with hyponatremia. In the hypernatremia group, confusion was more often present compared to  
36 normonatremia. A prolonged capillary refill, which could indicate dehydration, was more often present  
37 in the hypernatremia group and patients with hypernatremia also had a slightly higher heart rate.  
38 Hyponatremia was also associated with a slightly higher heart rate and, additionally, a slightly lower  
39 systolic blood pressure, although not clinically relevant. Both patients with hypernatremia as well as  
40 patients with hyponatremia had a lower eGFR, which was more pronounced in the former. Enhanced  
41 blood urea concentration was only associated with hypernatremia.  
42  
43  
44  
45  
46  
47  
48  
49  
50

51 Blood CRP and LDH concentrations were higher in patients with hyponatremia as compared to  
52 normonatremia (Table 2). In contrast, FiO<sub>2</sub> and CT-severity scores did not significantly differ between  
53 the groups. Clinical score systems MEWS and qSOFA<sup>24</sup> (Table 2) differed significantly between the  
54 groups, but these differences were not clinically relevant.  
55  
56  
57  
58  
59  
60

1  
2  
3 A duration of COVID-19 related-complaints for 14 days or less was associated with a slightly  
4 lower serum sodium concentration (136.2 mmol/L ( $\leq 14$  days) vs. 136.6 ( $>14$  days);  $p = 0.019$ ; one-way  
5 ANOVA) compared to patients that had complaints for 15 days or more.  
6  
7  
8  
9

### 10 **3.4 Clinical outcomes in patients presenting with hyponatremia and hypernatremia**

11  
12  
13  
14  
15  
16  
17  
18  
19  
20  
21  
22  
23  
24  
25  
26  
27  
28  
29  
30  
31  
32  
33  
34  
35  
36  
37  
38  
39  
40  
41  
42  
43  
44  
45  
46  
47  
48  
49  
50  
51  
52  
53  
54  
55  
56  
57  
58  
59  
60  
Hypernatremia was associated with higher mortality or palliative discharge rates as compared to normo- and hyponatremia groups (Table 3 and Figure 1). Moreover, patients with hypernatremia had a higher risk for ICU-admission and invasive ventilation. Hyponatremia was not associated with increased mortality / palliative discharge rates (Table 3). Although there was a trend towards increased mortality in patients with severe hyponatremia, these results were not statistically significant due to the low number of patients that presented with sodium levels below 125 mmol/L. After excluding patients with a 'do not intubate' order, hyponatremia was associated with a higher need for ICU-admission, but not with invasive ventilation (Table 3). Hyponatremia corrected for glucose was used for all statistical testing, but as some other studies used uncorrected hyponatremia<sup>13 14</sup>, we also tested if uncorrected hyponatremia was associated with different outcomes. Without correction for serum glucose concentration, hyponatremia was still associated with a slightly higher rate of ICU admission (OR 1.43 (1.25 – 1.62);  $p < 0.001$ ) and with the need for intubation (OR 1.26 (1.10 – 1.46);  $p = 0.001$ ), but not with death or palliative discharge rates (OR 1.11 (0.97 – 1.28);  $p = 0.13$ ). Despite the correlation with ICU admission in patients with hyponatremia, duration of admission when adjusted for age, sex assigned at birth, and a history of chronic kidney disease and hypertension was not significantly longer in this group. Similar outcomes were obtained for patients with conformed COVID-19 (SARS-CoV-2 PCR positive; 6673 patients) only, although in this subgroup ICU admission was no longer significantly higher for patients with hyponatremia.

As the COVID-19 pandemic progressed, the incidence of adverse outcomes was significantly lower in patients with normo-, and hyponatremia at presentation that were admitted after 20-09-2020 (2<sup>nd</sup> to 4<sup>th</sup> quartile) as compared to those admitted before 20-09-2020 (1<sup>st</sup> quartile; Figure 2), whereas hypernatremia was associated with a higher risk for ICU admission and invasive ventilation for patients that were admitted after 26-01-2022 (4<sup>th</sup> quartile; compared to patients admitted in the 1<sup>st</sup> quartile).

Administration of tocilizumab and COVID-19 vaccination were too infrequently reported to make a statement about the possible effects of these interventions on outcome measures.

### 3.5 Complications associated with hyponatremia at presentation

After correction for sex assigned at birth, age, and a history of chronic kidney disease and hypertension, the course of disease of patients with hyponatremia was more often complicated by an aspergillosis pneumonia and physical decline. Patients with hypernatremia more often suffered from acute respiratory distress syndrome, more frequently received treatment for septic shock (defined as the need for vasopressors in order to maintain mean arterial blood pressure >65 mmHg and blood lactate level >2 mmol/L, in the absence of other causes including hypovolemia), more frequently suffered from delirium. Excessive fluid resuscitation for the treatment of hypo- or hypernatremia could lead to congestive heart failure, however, the incidence of this complication was low and did not occur more often in patients with abnormal sodium values at presentation.

### 3.6 Urinary sodium excretion related to patients' characteristics and outcomes

USE was measured in 185 (6.9%) patients with hyponatremia of whom 145 (78%) patients did not use diuretics (48 with mild, 67 with moderate, and 30 with severe hyponatremia, respectively). USE ranged from 5.0 to 239 mmol/L (median 30.0 mmol/L). Urinary osmolarity (UOL) was measured in 81 (3.0%) patients who did not use diuretics; in 26 with 'mild', 37 with 'moderate', and 18 with 'severe' hyponatremia, with a range of 8 - 1007 mOsmol/kg (median 496 mOsmol/kg). Urinary investigation of 23 patients (21% of patients in whom both USE and UOL were measured) complied to the definition of SIADH (USE  $\geq$  30 mmol/L and UOL  $\geq$  100 mOsmol/kg in the absence of diuretics and in the absence of signs of hypovolemia (systolic blood pressure < 90 mmHg or heart rate  $\geq$  100 BPM)).

Patients were divided in two groups based on USE. Seventy-two (49.7% of urinary sodium measurements) patients had low USE (< 30 mmol/L) which indicates RAAS activation. Seventy-three (50.3%) patients had high USE ( $\geq$  30 mmol/L) which indicates RAAS inactivation (Supplemental Table 5). A low USE was associated with a higher CRP (111 (52.5 – 163) mmol/L vs. 70 (35.0 – 154) mmol/L;

1  
2  
3 p = 0.028) and LDH (351 (270 – 491) U/L vs. 273 (227- 434) U/L; p = 0.021) at presentation  
4  
5 (Supplemental Table 5), but not associated with symptoms such as nausea / vomiting or clinical signs  
6  
7 of hypovolemia, such as tachycardia or hypotension. Outcome measures, such as duration of  
8  
9 admission, ICU admission, or death/palliative discharge, did not differ between patients with a low and  
10  
11 high USE.  
12  
13  
14  
15  
16  
17  
18  
19  
20  
21  
22  
23  
24  
25  
26  
27  
28  
29  
30  
31  
32  
33  
34  
35  
36  
37  
38  
39  
40  
41  
42  
43  
44  
45  
46  
47  
48  
49  
50  
51  
52  
53  
54  
55  
56  
57  
58  
59  
60

For peer review only

#### 4. Discussion

In this large multicenter observational cohort study, including 7811 patients with COVID-19 included over a long period of time and multiple phases of the COVID-pandemic, we found that hyponatremia was highly prevalent but not associated with higher mortality rates. Although less prevalent, hypernatremia was associated with a three-to-four-fold increased risk of worse outcome in terms of higher risk for ICU-admission, intubation, and mortality. Hyponatremia was also associated with a higher risk for ICU-admission, but not for intubation. Admission of patients with hyponatremia was more frequently complicated by aspergillosis pneumonia and physical decline and patients with hypernatremia more often suffered from sepsis and delirium. Hypo- and hypernatremia were more prevalent in elderly patients, those with chronic kidney disease, and lower body weight. Hyponatremia in COVID-19 patients appeared to have multiple etiologies, but hypovolemic hyponatremia was found to be predominant.

Hyponatremia is a common finding among COVID-19 patients, with an incidence of 34.3% in our study. This incidence is higher than previously reported rates between 9.9% and 30%<sup>5 13 14 25-29</sup>, but is in line with Voets, et al.<sup>9</sup> Tezcan, et al.<sup>30</sup> and Sarvazad, et al.<sup>10</sup>, who reported rates of 34%, 35.8% and 38%, respectively (the latter study included only patients without underlying disease). The incidence of hyponatremia among patients with COVID-19 is found to be higher compared to hyponatremia in other pneumonias: 5.4%- 28%<sup>7 31</sup>. Hyponatremia is most common in pneumonias caused by viral pathogens (e.g. rhinovirus, respiratory syncytial virus, (para)influenza virus, and adenovirus) with a incidence reported of 17.6%, as compared to 13.8% in patients with bacterial pneumonias<sup>31</sup>. Patients presenting with hyponatremia in our study were significantly older compared to patients with normonatremia. Possibly this could be due to age-related tubular atrophy and subsequent decreased urine concentrating capacity and sodium reabsorption<sup>32</sup>. Although previous studies reported various underlying conditions as risk factor for hyponatremia, including diabetes<sup>13</sup>, we only found that patients with chronic kidney disease and those with a slightly lower BMI were at risk for presenting with dysnatremia.

Hypernatremia is less common among COVID-19 patients compared to other pneumonias, with an incidence of 1.6% in our study. This number is lower than the incidences reported previously (2.9 %- 38%)<sup>9 13 27 28</sup> and also lower than 5.3% reported in patients with a community acquired pneumonia<sup>33</sup>. Patients with hypernatremia were older than patients with normo- or hyponatremia. These age

1  
2  
3 differences were in line with our expectations, since age-related impairment of the thirst mechanism and  
4 barriers to accessible fluids (e.g. due to immobilization or dementia) could lead to inadequate fluid intake  
5 with consequent hypernatremia<sup>20</sup>.  
6  
7

8 Hyponatremia in infectious diseases can have multiple etiologies, of which SIADH and  
9 hypovolemia are the most common<sup>7</sup>. In this study we showed that both etiologies seem to play a role in  
10 COVID-19 patients. Among patients with hyponatremia a higher incidence of diarrhea and anosmia  
11 (which could lead to decreased appetite) was found. Clinical investigations showed an increased heart  
12 rate and slightly decreased systolic blood pressure, suggesting hypovolemic state as a possible  
13 underlying cause for hyponatremia. This hypovolemic state could result from a reduced dietary intake  
14 as well as from dehydration due to diarrhea. The low median USE (30 mmol/L) in a proportion of patients  
15 also points to extrarenal sodium loss and a hypovolemic status<sup>34</sup>. However, USE was only reported for  
16 a small number of patients and thus should be interpreted as supportive measurement rather than hard  
17 indicator.  
18  
19  
20  
21  
22  
23  
24  
25  
26  
27

28 Moreover, patients presenting with hyponatremia had higher LDH and CRP serum  
29 concentrations and lower eGFR. A relationship between serum CRP and sodium concentration was  
30 found in other infectious diseases. Previous reports ascribed this phenomenon to release of cytokines  
31 such as interleukin-6 and interleukin-1 $\beta$ <sup>35</sup>, which proposedly cause hyponatremia by affecting ADH-  
32 secretion, thus causing SIADH<sup>18</sup>. Since interleukin-6 and interleukin-1 $\beta$  are also enhanced in COVID-  
33 19-infected patients<sup>36 37</sup>, a similar mechanism could be of action in COVID-19-infected patients with  
34 hyponatremia.  
35  
36  
37  
38  
39  
40

41 In fact, Frontera, et al.<sup>14</sup> found that interleukin-6 levels in COVID-19 patients were progressively  
42 higher as the degree of hyponatremia worsened. In our study, however, only 21% of USE + UOL  
43 samples complied to the definition of SIADH and in contrast to this theory, a correlation between low  
44 urinary sodium excretion and serum CRP concentration was found (Supplemental Table 5). Cuesta, et  
45 al.<sup>38</sup> found an incidence of SIADH of 46% in all patients with hyponatremia and community acquired  
46 pneumonia. The overall incidence of SIADH in our study seems to suggest that SIADH is a less frequent  
47 cause of hyponatremia among COVID-19 patients, compared to hyponatremia in patients with other  
48 pneumonias. This is possibly because COVID-19 more often causes diarrhea thereby also leading to  
49 other causes of hyponatremia. Although previous SIADH was most reported as the underlying  
50 mechanism in previous studies<sup>29</sup>, the underlying mechanism in our population could be different due to  
51  
52  
53  
54  
55  
56  
57  
58  
59  
60

1  
2  
3 the fact that patients from later COVID-19 waves were included. Later COVID-19 variants and group  
4 immunity have led to less critically ill patients during later COVID-19 waves, which could reduce the  
5 number of patients suffering from SIADH. The fact that in our study urinary investigation was not  
6 performed in all patients with hyponatremia may suggest that hyponatremia was not persistent or was  
7 otherwise not found to be severe enough to do so.  
8  
9  
10  
11

12 As expected, patients with hyponatremia more frequently used thiazide diuretics, as thiazide  
13 diuretics are associated with a higher risk for developing hyponatremia<sup>39</sup>. The use of  
14 immunosuppressives was also related to hyponatremia, which could be related to a possible (relative)  
15 glucocorticoid deficiency resulting from iatrogenic adrenal insufficiency due to the (prior) prescription of  
16 steroids<sup>40 41</sup>.  
17  
18  
19  
20  
21

22 We did not find a significant association between hyponatremia and the risk of mortality or  
23 intubation, although ICU admission rates were higher in the hyponatremia group. These results are in  
24 line with Martino, et al. <sup>27</sup>, who reported that patients with hyponatremia compared to those with  
25 normonatremia, and those stratified in different hyponatremia severity groups had similar risks for ICU  
26 admission, mechanical ventilation in ICU, length of hospital stay, and death. This is in contrast with  
27 previous studies, in which the presence of hyponatremia at presentation was independently associated  
28 with disease severity and prolonged hospital stay <sup>31</sup> and was thought to be an independent predictor of  
29 hospital mortality<sup>13 14 29</sup>, especially when not corrected for serum glucose concentration<sup>15</sup>. These results  
30 are also not in line with higher serum CRP and LDH concentrations in hyponatremic patients, indicating  
31 that these patients might be more ill compared to normonatremic patients<sup>42 43</sup>. We hypothesize that  
32 dehydration with hyponatremia combined with a high LDH and CRP serum concentration were reasons  
33 for hospital admittance. Other pathophysiologic mechanisms leading to worse outcome were absent in  
34 these patients, favoring a relatively good outcome. The observed trend towards increased mortality in  
35 patients with severe hyponatremia was also demonstrated by <sup>13</sup> and Frontera, et al. <sup>14</sup>. However, the  
36 latter study obtained statistically significant results with a lower number of patients (36 / 4645 (1%)  
37 stratified as severe hyponatremia based on sodium levels  $\leq 120$  mmol/L versus 1.8% in our study),  
38 which could not be confirmed by our study.  
39  
40  
41  
42  
43  
44  
45  
46  
47  
48  
49  
50  
51  
52  
53  
54

55 There are two possible explanations for the difference in outcomes compared with previous  
56 studies. First, our study population differed to that of previous studies<sup>13 14 29</sup>. Both Frontera, et al. <sup>14</sup>,  
57 Ruiz-Sánchez, et al. <sup>13</sup>, and Hirsch, et al. <sup>15</sup> included only patients that were admitted during the spring  
58  
59  
60

1  
2  
3 of 2020; the beginning of the COVID-19 pandemic, whereas our study included patients from the start  
4 of the COVID-19 pandemic until October 2021. We showed that mortality, ICU-admission, and intubation  
5 rates in the normo- and hyponatremia groups differed significantly between patients that were included  
6 during the spring of 2020 versus patients that were included in later COVID-19 waves. These differences  
7 in mortality most likely relate to increased knowledge of the disease, new treatments such as  
8 dexamethasone and tocilizumab, and the fact that the vaccination campaign against COVID-19 started  
9 in January 2021. These differences in patient cohorts and treatment strategies could affect outcomes  
10 and thus could lead to different results as compared to other studies. We hypothesize that the fact we  
11 did not find a higher risk of adverse outcome in patients with hyponatremia in contrast to previous  
12 studies was partly because the overall mortality decreased as the pandemic continued.  
13  
14  
15  
16  
17  
18  
19  
20  
21

22 Second, Frontera, et al.<sup>14</sup> and Ruiz-Sánchez, et al.<sup>13</sup> studied uncorrected sodium concentration  
23 at presentation as prognostic factor and found increased mortality rates in these patients, while others,  
24 who corrected for serum glucose concentration when these exceeded 10 mmol/L, found no association  
25 between hyponatremia and mortality<sup>44</sup>. Hirsch, et al.<sup>15</sup> demonstrated that hyponatremia was only  
26 associated with an increased mortality risk prior to correction for serum glucose concentration, but the  
27 association vanished after correction for glucose. These results were similar to other, non-COVID-19  
28 studies<sup>45</sup>. In our study, uncorrected hyponatremia was, besides an increased risk for ICU admission,  
29 also associated with an increased risk for intubation, which was not the case for corrected hyponatremia.  
30 This indicates that a similar effect could be explanatory for the different results between our study and  
31 others<sup>13 14</sup>.  
32  
33  
34  
35  
36  
37  
38  
39  
40

41 In contrast to the results found in patients with hyponatremia, hypernatremia was significantly  
42 associated with ICU-admission, intubation, and death. Although serum CRP and LDH concentration in  
43 these patients did not differ significantly compared to normonatremic patients, CT-severity scores at  
44 admission in combination with higher MEWS and qSOFA scores indicate that a higher percentage of  
45 lung tissue was affected in these patients. Moreover, elevated serum urea concentration, lower eGFR,  
46 and a prolonged capillary refill indicate dehydration also in this patient group. Together, these findings  
47 indicate a more critically ill patient group which could explain worse clinical outcomes. Hypernatremia  
48 as predictor of worse clinical outcomes has been previously reported in COVID-19<sup>13</sup> and other  
49 pneumonias<sup>33</sup>.  
50  
51  
52  
53  
54  
55  
56  
57  
58  
59  
60



1  
2  
3 Our study is the largest study on hyponatremia in COVID-19 so far and includes over 7000  
4 patients from different hospitals in the Netherlands. More importantly, our study included patients from  
5 different COVID-19 waves and from multiple hospitals, both university and general, resulting in an  
6 heterogenous patient population and leading to results that are applicable to the current situation. We  
7 believe this is a major strength of our study. Moreover, a large amount of clinical data was available for  
8 each patient, allowing us to interpret the associations we found with the help of patient background  
9 information. For example, vital signs at admission were reported, giving us a better view on the patients'  
10 condition at admission than in previous studies<sup>13 14</sup> and allowing us to make more substantiated  
11 statements about the presumed underlying etiology.  
12  
13  
14  
15  
16  
17  
18  
19

20 This study also has several limitations. Firstly, although urinary samples were available for 185  
21 patients with hyponatremia, this number was low relative to the total number of patients with  
22 hyponatremia included in our study. Also, the duration of hyponatremia and the expected etiology of the  
23 hyponatremia in participating patients was not provided. Second, treatment protocols between  
24 participating hospitals differed, and the study did not take into account the different treatment options  
25 that became available for COVID-19 during the ongoing pandemic. This may have influenced outcome  
26 of patients. Lastly, we were unable to study specific treatment options for hyponatremia in patients.  
27  
28  
29  
30  
31  
32  
33

34 Our results indicate that although hyponatremia is highly prevalent among COVID-19 patients,  
35 hyponatremia is not associated with adverse clinical outcome. The presence of hypernatremia, however,  
36 is more worrisome and clinicians should be aware of the poorer prognosis in these patients. To better  
37 understand the etiology of hyponatremia in COVID-19, future studies should focus on the clinical course  
38 of hyponatremia during admission and record the duration of hyponatremia and treatment given.  
39 Preferably, urinary samples will be obtained in all patients presenting with COVID-19 and hyponatremia  
40 to further determine etiology. Moreover, further research is needed to elucidate the incidence and  
41 possible mechanism of SIADH in relation to disease severity and inflammation. More specifically,  
42 studies on the relationship with interleukin-6 would be of interest, because of the interleukin-6 antagonist  
43 tocilizumab is used in the treatment of patients with moderate to severe COVID-19.  
44  
45  
46  
47  
48  
49  
50  
51  
52  
53  
54  
55  
56  
57  
58  
59  
60

## 5. Conclusion

Hyponatremia is a common electrolyte disorder found in one third of patients hospitalized with COVID-19. Risk factors for hyponatremia include male sex assigned at birth, a slightly lower BMI, chronic kidney disease, hypertension, the use of thiazide diuretics, and the use of immunosuppressives. We found that hyponatremia was not associated with a higher need for invasive ventilation nor with mortality. In contrast, hypernatremia was associated with worse outcomes as compared to normonatremia. As for the underlying pathophysiological mechanism, hypovolemic hyponatremia was thought to be the predominant underlying pathophysiological mechanism in COVID-19 patients. Other causes of hyponatremia, such as SIADH, were found to be less prevalent.

## Competing of interest

The authors declare that there is no conflict of interest.

## Acknowledgements

We want to acknowledge the contribution of the CovidPredict working group, including the clinicians that contributed to data collection and the students responsible for data entry, and we would like to acknowledge E. Martens for his help with the analysis.

## Authors contributions

- L.R. de Haan contributed to data entry in the COVIDPredict database, data analysis and interpretation, and drafted the article.
- M. ten Wolde contributed to data entry in the COVIDPredict database, data analysis and interpretation, and critically revised the article.
- M. Beudel contributed to data entry in the COVIDPredict database, and critically revised the article.
- R.H. Olde Engberink contributed to data entry in the COVIDPredict database, and critically revised the article.
- B. Appelman contributed to data entry in the COVIDPredict database, and critically revised the article.

- 1  
2  
3 - E.K. Haspels-Hogervorst contributed to data entry in the COVIDPredict database, and  
4 critically revised the article.  
5  
6  
7 - D. Rusch contributed to data entry in the COVIDPredict database, and critically revised the  
8 article.  
9  
10  
11 - N.C. Gritters-van den Oever contributed to data entry in the COVIDPredict database, and  
12 critically revised the article.  
13  
14  
15 - S. Simsek contributed to data entry in the COVIDPredict database, and critically revised the  
16 article.  
17  
18  
19 - N. Paternotte contributed to data entry in the COVIDPredict database, and critically revised  
20 the article.  
21  
22  
23 - J.P. van den Bergh contributed to data entry in the COVIDPredict database, and critically  
24 revised the article.  
25  
26  
27 - C.E. Wyers contributed to data entry in the COVIDPredict database, and critically revised the  
28 article.  
29  
30  
31 - M. de Kruif contributed to data entry in the COVIDPredict database, and critically revised the  
32 article.  
33  
34  
35 - T. Dormans contributed to data entry in the COVIDPredict database, and critically revised the  
36 article.  
37  
38  
39 - H. Moeniralam contributed to data entry in the COVIDPredict database, and critically revised  
40 the article.  
41  
42  
43 - N. Bokhizzou contributed to data entry in the COVIDPredict database, and critically revised  
44 the article.  
45  
46  
47 - K. Brinkman contributed to data entry in the COVIDPredict database, and critically revised the  
48 article.  
49  
50  
51 - R.A. Douma contributed to data entry in the COVIDPredict database, data analysis and  
52 interpretation, and critically revised the article.  
53  
54

## 55 Funding

56  
57 This research received no specific grant from any funding agency in the public, commercial, or not-for-  
58 profit sectors.  
59  
60

## References

1. World\_Health\_Organization. COVID-19 Weekly Epidemiological Update, Edition 114, published 19 October 2022. 2022
2. Chen N, Zhou M, Dong X, et al. Epidemiological and clinical characteristics of 99 cases of 2019 novel coronavirus pneumonia in Wuhan, China: a descriptive study. *Lancet* 2020;395(10223):507-13. doi: 10.1016/s0140-6736(20)30211-7 [published Online First: 2020/02/03]
3. Horby P, Lim WS, Emberson JR, et al. Dexamethasone in Hospitalized Patients with Covid-19 - Preliminary Report. *N Engl J Med* 2020 doi: 10.1056/NEJMoa2021436 [published Online First: 2020/07/18]
4. Berni A, Malandrino D, Parenti G, et al. Hyponatremia, IL-6, and SARS-CoV-2 (COVID-19) infection: may all fit together? *J Endocrinol Invest* 2020;43(8):1137-39. doi: 10.1007/s40618-020-01301-w [published Online First: 2020/05/27]
5. Wu Y, Hou B, Liu J, et al. Risk Factors Associated With Long-Term Hospitalization in Patients With COVID-19: A Single-Centered, Retrospective Study. *Front Med (Lausanne)* 2020;7:315. doi: 10.3389/fmed.2020.00315 [published Online First: 2020/06/26]
6. COVID-PREDICT-werkgroep. Klinisch beloop van covid-19 in Nederland. *NTVG* 2021;165
7. Liamis G, Milionis HJ, Elisaf M. Hyponatremia in patients with infectious diseases. *J Infect* 2011;63(5):327-35. doi: 10.1016/j.jinf.2011.07.013 [published Online First: 2011/08/13]
8. Gheorghe G, Ilie M, Bungau S, et al. Is There a Relationship between COVID-19 and Hyponatremia? *Medicina (Kaunas)* 2021;57(1) doi: 10.3390/medicina57010055 [published Online First: 2021/01/14]
9. Voets PJ, Frölke SC, Vogtländer NP, et al. COVID-19 and dysnatremia: A comparison between COVID-19 and non-COVID-19 respiratory illness. *SAGE Open Med* 2021;9:20503121211027778. doi: 10.1177/20503121211027778 [published Online First: 2021/07/16]
10. Sarvazad H, Cahngaripour SH, Eskandari Roozbahani N, et al. Evaluation of electrolyte status of sodium, potassium and magnesium, and fasting blood sugar at the initial admission of individuals with COVID-19 without underlying disease in Golestan Hospital, Kermanshah. *New Microbes New Infect* 2020;38:100807. doi: 10.1016/j.nmni.2020.100807 [published Online First: 2020/12/10]
11. Upadhyay A, Jaber BL, Madias NE. Incidence and prevalence of hyponatremia. *Am J Med* 2006;119(7 Suppl 1):S30-5. doi: 10.1016/j.amjmed.2006.05.005 [published Online First: 2006/07/18]
12. Akbar MR, Pranata R, Wibowo A, et al. The Prognostic Value of Hyponatremia for Predicting Poor Outcome in Patients With COVID-19: A Systematic Review and Meta-Analysis. *Front Med (Lausanne)* 2021;8:666949. doi: 10.3389/fmed.2021.666949 [published Online First: 2021/07/02]
13. Ruiz-Sánchez JG, Núñez-Gil IJ, Cuesta M, et al. Prognostic Impact of Hyponatremia and Hypernatremia in COVID-19 Pneumonia. A HOPE-COVID-19 (Health Outcome Predictive Evaluation for COVID-19) Registry Analysis. *Front Endocrinol (Lausanne)* 2020;11:599255. doi: 10.3389/fendo.2020.599255 [published Online First: 2020/12/18]
14. Frontera JA, Valdes E, Huang J, et al. Prevalence and Impact of Hyponatremia in Patients With Coronavirus Disease 2019 in New York City. *Crit Care Med*

- 2020;48(12):e1211-e17. doi: 10.1097/ccm.0000000000004605 [published Online First: 2020/08/23]
15. Hirsch JS, Uppal NN, Sharma P, et al. Prevalence and outcomes of hyponatremia and hypernatremia in patients hospitalized with COVID-19. *Nephrol Dial Transplant* 2021;36(6):1135-38. doi: 10.1093/ndt/gfab067 [published Online First: 2021/03/17]
  16. Fernandez Martinez A, Barajas Galindo D, Ruiz Sanchez J. Management of hyponatraemia and hypernatraemia during the Covid-19 pandemic: a consensus statement of the Spanish Society for Endocrinology (Acqua Neuroendocrinology Group). *Rev Endocr Metab Disord* 2021;22(2):317-24. doi: 10.1007/s11154-021-09627-3 [published Online First: 2021/02/07]
  17. Rondon-Berrios H, Agaba EI, Tzamaloukas AH. Hyponatremia: pathophysiology, classification, manifestations and management. *Int Urol Nephrol* 2014;46(11):2153-65. doi: 10.1007/s11255-014-0839-2 [published Online First: 2014/09/25]
  18. Hodax JK, Bialo SR, Yalcindag A. SIADH in Systemic JIA Resolving After Treatment With an IL-6 Inhibitor. *Pediatrics* 2018;141(1) doi: 10.1542/peds.2016-4174 [published Online First: 2017/12/16]
  19. Salama C, Han J, Yau L, et al. Tocilizumab in Patients Hospitalized with Covid-19 Pneumonia. *N Engl J Med* 2021;384(1):20-30. doi: 10.1056/NEJMoa2030340 [published Online First: 2020/12/18]
  20. Kugler JP, Hustead T. Hyponatremia and hypernatremia in the elderly. *Am Fam Physician* 2000;61(12):3623-30. [published Online First: 2000/07/13]
  21. Prokop M, van Everdingen W, van Rees Vellinga T, et al. CO-RADS: A Categorical CT Assessment Scheme for Patients Suspected of Having COVID-19-Definition and Evaluation. *Radiology* 2020;296(2):E97-e104. doi: 10.1148/radiol.2020201473 [published Online First: 2020/04/28]
  22. Hillier TA, Abbott RD, Barrett EJ. Hyponatremia: evaluating the correction factor for hyperglycemia. *Am J Med* 1999;106(4):399-403. doi: 10.1016/s0002-9343(99)00055-8 [published Online First: 1999/05/04]
  23. Inker LA, Eneanya ND, Coresh J, et al. New Creatinine- and Cystatin C-Based Equations to Estimate GFR without Race. *N Engl J Med* 2021;385(19):1737-49. doi: 10.1056/NEJMoa2102953 [published Online First: 2021/09/24]
  24. van der Woude SW, van Doormaal FF, Hutten BA, et al. Classifying sepsis patients in the emergency department using SIRS, qSOFA or MEWS. *Neth J Med* 2018;76(4):158-66. [published Online First: 2018/05/31]
  25. De Carvalho H, Richard MC, Chouihed T, et al. Electrolyte imbalance in COVID-19 patients admitted to the Emergency Department: a case-control study. *Intern Emerg Med* 2021;16(7):1945-50. doi: 10.1007/s11739-021-02632-z [published Online First: 2021/01/24]
  26. Hu W, Lv X, Li C, et al. Disorders of sodium balance and its clinical implications in COVID-19 patients: a multicenter retrospective study. *Intern Emerg Med* 2021;16(4):853-62. doi: 10.1007/s11739-020-02515-9 [published Online First: 2020/10/17]
  27. Martino M, Falcioni P, Giancola G, et al. Sodium alterations impair the prognosis of hospitalized patients with COVID-19 pneumonia. *Endocr Connect* 2021;10(10):1344-51. doi: 10.1530/ec-21-0411 [published Online First: 2021/09/18]
  28. Atila C, Sailer CO, Bassetti S, et al. Prevalence and outcome of dysnatremia in patients with COVID-19 compared to controls. *Eur J Endocrinol* 2021;184(3):409-18. doi: 10.1530/eje-20-1374 [published Online First: 2021/01/16]

29. Khidir RJY, Ibrahim BAY, Adam MHM, et al. Prevalence and outcomes of hyponatremia among COVID-19 patients: A systematic review and meta-analysis. *Int J Health Sci (Qassim)* 2022;16(5):69-84. [published Online First: 2022/09/15]
30. Tezcan ME, Dogan Gokce G, Sen N, et al. Baseline electrolyte abnormalities would be related to poor prognosis in hospitalized coronavirus disease 2019 patients. *New Microbes New Infect* 2020;37:100753. doi: 10.1016/j.nmni.2020.100753 [published Online First: 2020/09/10]
31. Królicka AL, Kruczkowska A, Krajewska M, et al. Hyponatremia in Infectious Diseases- A Literature Review. *Int J Environ Res Public Health* 2020;17(15) doi: 10.3390/ijerph17155320 [published Online First: 2020/07/29]
32. Chang-Panesso M. Acute kidney injury and aging. *Pediatr Nephrol* 2021;36(10):2997-3006. doi: 10.1007/s00467-020-04849-0 [published Online First: 2021/01/08]
33. Tokgöz Akyil F, Akyil M, Çoban Ağca M, et al. Hyponatremia prolongs hospital stay and hypernatremia better predicts mortality than hyponatremia in hospitalized patients with community-acquired pneumonia. *Tuberk Toraks* 2019;67(4):239-47. doi: 10.5578/tt.68779 [published Online First: 2020/02/14]
34. Spasovski G, Vanholder R, Allolio B, et al. Clinical practice guideline on diagnosis and treatment of hyponatraemia. *Intensive Care Med* 2014;40(3):320-31. doi: 10.1007/s00134-014-3210-2 [published Online First: 2014/02/25]
35. Park SJ, Shin JI. Inflammation and hyponatremia: an underrecognized condition? *Korean J Pediatr* 2013;56(12):519-22. doi: 10.3345/kjp.2013.56.12.519 [published Online First: 2014/01/15]
36. Leaf DE, Gupta S, Wang W. Tocilizumab in Covid-19. *N Engl J Med* 2021;384(1):86-87. doi: 10.1056/NEJMc2032911 [published Online First: 2020/12/29]
37. Soy M, Keser G, Atagündüz P, et al. Cytokine storm in COVID-19: pathogenesis and overview of anti-inflammatory agents used in treatment. *Clin Rheumatol* 2020;39(7):2085-94. doi: 10.1007/s10067-020-05190-5 [published Online First: 2020/06/01]
38. Cuesta M, Slattery D, Goulden EL, et al. Hyponatraemia in patients with community-acquired pneumonia; prevalence and aetiology, and natural history of SIAD. *Clin Endocrinol (Oxf)* 2019;90(5):744-52. doi: 10.1111/cen.13937 [published Online First: 2019/01/19]
39. Filippone EJ, Ruzieh M, Foy A. Thiazide-Associated Hyponatremia: Clinical Manifestations and Pathophysiology. *Am J Kidney Dis* 2020;75(2):256-64. doi: 10.1053/j.ajkd.2019.07.011 [published Online First: 2019/10/14]
40. Garrahy A, Thompson CJ. Hyponatremia and Glucocorticoid Deficiency. *Front Horm Res* 2019;52:80-92. doi: 10.1159/000493239 [published Online First: 2020/02/26]
41. Rodríguez Virgili J, Cabal García AA. [Iatrogenic adrenal insufficiency]. *Semergen* 2012;38(7):468-71. doi: 10.1016/j.semerg.2011.10.005 [published Online First: 2012/10/02]
42. Li K, Wu J, Wu F, et al. The Clinical and Chest CT Features Associated With Severe and Critical COVID-19 Pneumonia. *Invest Radiol* 2020;55(6):327-31. doi: 10.1097/rli.0000000000000672 [published Online First: 2020/03/03]
43. Salvatore C, Roberta F, Angela L, et al. Clinical and laboratory data, radiological structured report findings and quantitative evaluation of lung involvement on baseline chest CT in COVID-19 patients to predict prognosis. *Radiol Med* 2020:1-11. doi: 10.1007/s11547-020-01293-w [published Online First: 2020/10/14]
44. Tzoulis P, Waung JA, Bagkeris E, et al. Dysnatremia is a Predictor for Morbidity and Mortality in Hospitalized Patients with COVID-19. *J Clin Endocrinol Metab*

1  
2  
3  
4  
5  
6  
7  
8  
9  
10  
11  
12  
13  
14  
15  
16  
17  
18  
19  
20  
21  
22  
23  
24  
25  
26  
27  
28  
29  
30  
31  
32  
33  
34  
35  
36  
37  
38  
39  
40  
41  
42  
43  
44  
45  
46  
47  
48  
49  
50  
51  
52  
53  
54  
55  
56  
57  
58  
59  
60

2021;106(6):1637-48. doi: 10.1210/clinem/dgab107 [published Online First: 2021/02/25]  
45. Waikar SS, Mount DB, Curhan GC. Mortality after hospitalization with mild, moderate, and severe hyponatremia. *Am J Med* 2009;122(9):857-65. doi: 10.1016/j.amjmed.2009.01.027 [published Online First: 2009/08/25]

For peer review only

## Figure legends

**Figure 1.** Hazard ratios of cox proportional survival curves for survival probability for each sodium value adjusted for age, sex assigned at birth, a history of chronic kidney disease, and a history of hypertension. The grey area indicates the normonatremia. Table shows hazard ratios for covariates and sodium as a continuous variable **(A)**. Cox proportional survival curves at the mean of covariates for **(B)** unadjusted 6-week mortality stratified by normo-, hypo-, and hypernatremia, **(C)** 6-week mortality adjusted for age, sex assigned at birth, a history of chronic kidney disease, and a history of hypertension stratified in normo-, hypo-, and hypernatremia. \*\*\* indicates a p-value <0.001

**Figure 2.** Odds ratio for adverse outcomes (death / palliative discharge **(A)**, intensive care unit admission **(B)** invasive ventilation **(C)**) in each quartile compared to patients in the first quartile (admitted before 27-03-2020; N = 2002) for patients with hypo-, hyper-, or normonatremia at admission. \* Indicates a p-value <0.05, \*\* indicates a p-value < 0.01, \*\*\* indicates a p-value <0.001 for the odds ratio as calculated by binary logistic regression. **(D)** incidence of hypo-, normo-, and hypernatremia in each quartile, \*\*\* indicates a p-value <0.001 as compared to the first quartile for the chi-square statistic with Bonferroni post-hoc correction.



**Table 1** – Comparison of patient characteristics between COVID-19 patients with hypo-, normo-, and hypernatremia

|                                             | <b>Hyponatremia</b><br>Na 134 mmol/L<br>N = 2677     | <b>Normonatremia</b><br>Na 136 – 145 mmol/L<br>N = 5008 | <b>Hypernatremia</b><br>Na 146 mmol/L<br>N = 126     |
|---------------------------------------------|------------------------------------------------------|---------------------------------------------------------|------------------------------------------------------|
| Sex assigned at birth (N (%))               | ♂ 1673 (62.5%)<br>♀ 1003 (37.5%)<br><b>p = 0.002</b> | ♂ 2946 (58.8 %)<br>♀ 2060 (41.2 %)                      | ♂ 84 (66.7%)<br>♀ 42 (33.3%)                         |
| Age (median age in years (IQR))             | N = 2675<br>67.0 (58.0-77.0)<br><b>p &lt; 0.001</b>  | N = 5008<br>66.1 (55.0-76.0)                            | N = 126<br>72.5 (62.8 – 80.3)<br><b>p &lt; 0.001</b> |
| BMI (median BMI in kg/m <sup>2</sup> (IQR)) | N = 1740<br>27.2 (24.2 – 31.1)<br><b>p = 0.009</b>   | N = 3374<br>27.7 (24.6 – 31.6)                          | N = 91<br>25.0 (22.2 – 29.1)<br><b>p &lt; 0.001</b>  |
| Order 'Do not intubate' (N (%))             | 440 / 1442 (30.5 %)                                  | 796 / 2469 (32.2 %)                                     | 39 / 77 (50.6 %)<br><b>p = 0.004</b>                 |
| Chronic cardiac disease (N (%))             | 760 / 2666 (28.5%)<br>p = 0.07                       | 1334 / 4982 (26.8 %)                                    | 42 / 123 (34.1 %)<br>p = 0.07                        |
| Hypertension (N (%))                        | 1055 / 2374 (44.4 %)<br><b>p = 0.002</b>             | 1889 / 4586 (41.2 %)                                    | 64 / 120 (53.3 %)                                    |
| Chronic pulmonary disease (N (%))           | 466 / 2662 (17.5 %)<br>p = 0.75                      | 844 / 4979 (17.0 %)                                     | 19 / 122 (15.6 %)<br>p = 0.75                        |
| Chronic kidney disease (N (%))              | 329 / 2379 (13.8 %)<br><b>p &lt; 0.001</b>           | 491 / 4587 (10.7 %)                                     | 26 / 121 (21.5 %)<br><b>p &lt; 0.001</b>             |
| Moderate to severe liver disease (N (%))    | 30 / 2662 (1.1 %)<br>p = 0.46                        | 50 / 4972 (1.0 %)                                       | 0 / 123 (0.0 %)<br>p = 0.46                          |
| Diabetes (N (%))                            | 664 / 2662 (24.9 %)<br>p = 0.39                      | 1261 / 4972 (25.4 %)                                    | 38 / 125 (30.4 %)<br>p = 0.39                        |
| Immunosuppressives (N (%))                  | 192 / 2283 (8.4 %)<br><b>p = 0.002</b>               | 295 / 4445 (6.6 %)                                      | 2 / 118 (1.7 %)                                      |
| Thiazide diuretics (N (%))                  | 258 / 2671 (9.7 %)<br><b>p = 0.015</b>               | 394 / 4994 (7.9 %)                                      | 7 / 125 (5.6 %)                                      |
| Loop diuretics (N (%))                      | 187 / 2671 (7.0 %)<br>p = 0.22                       | 389 / 4994 (7.8 %)                                      | 13 / 125 (10.4 %)<br>p = 0.22                        |
| SSRIs / SNRIs (N (%))                       | 78 / 2671 (2.9 %)<br>p = 0.69                        | 164 / 4994 (3.3 %)                                      | 4 / 125 (3.2 %)<br>p = 0.69                          |

BMI = body mass index; IQR = interquartile range; % = percentage of patients in this group with indicated characteristic; SSRI = Selective Serotonin Reuptake inhibitor; SNRI = Selective Serotonin and Noradrenalin Reuptake inhibitor. Significance was assessed using a Kruskal Wallis test with post-hoc correction (for numerical data; non-normally distributed) or Chi-square test (for categorical data). p – values for all groups indicate the adjusted significance after post-hoc correction when compared to the normonatremia group. When no p – value was provided there was no significant difference compared to the normonatremia group. Subgroup analyses for hyponatremia is provided in the supplemental information.

**Table 2** – Comparison of signs and symptoms at presentation between COVID-19 patients with hypo-, normo-, and hypernatremia

| Signs and symptoms                                                                                         | Hyponatremia<br>Na 134 mmol/L<br>N = 2677  | Normonatremia<br>Na 136 – 145 mmol/L<br>N = 5008 | Hypernatremia<br>Na 146 mmol/L<br>N = 126 |
|------------------------------------------------------------------------------------------------------------|--------------------------------------------|--------------------------------------------------|-------------------------------------------|
| Nausea / vomiting (N (%))                                                                                  | 679 / 2273 (29.9 %)<br>p = 0.04            | 1150 / 4129 (27.9 %)                             | 16 / 83 (19.3 %)<br>p = 0.04              |
| Diarrhea (N (%))                                                                                           | 804 / 2298 (35.0%)<br>p < 0.001            | 1146 / 4157 (27.6 %)                             | 15 / 82 (18.3 %)                          |
| Anosmia (N (%))                                                                                            | 244 / 1904 (12.8 %)<br>p = 0.002           | 352 / 3330 (10.6 %)                              | 1 / 66 (1.5 %)                            |
| Confusion (N (%))                                                                                          | 311 / 2319 (13.4%)                         | 651 / 4381 (14.9 %)                              | 45 / 105 (42.9 %)<br>p < 0.001            |
| Seizures (N (%))                                                                                           | 10 / 1977 (0.5%)<br>p = 0.20               | 31 / 3452 (0.9 %)                                | 0 / 80 (0.0 %)<br>p = 0.20                |
| FiO2 (median fraction (IQR))                                                                               | N = 1159<br>0.36 (0.28-0.50)<br>p = 0.05   | N = 2084<br>0.36 (0.28 – 0.50)                   | N = 67<br>0.44 (0.30 – 0.80)<br>p = 0.05  |
| SBP (mean SBP in mmHg (SD))                                                                                | N = 2648<br>132 (± 22)<br>p < 0.001        | N = 4971<br>135 (±23)                            | N = 120<br>135 (± 25)<br>p = 1.00         |
| HR (mean HR in BPM (SD))                                                                                   | N = 2661<br>92 (±18)<br>p = 0.003          | N = 4965<br>91 (±20)                             | N = 123<br>95 (±25)<br>p = 0.034          |
| Disturbed capillary refill (N (%))                                                                         | 81 / 863 (9.4 %)                           | 93 / 1369 (6.8 %)                                | 6 / 33 (18.2 %)<br>p = 0.008              |
| Blood urea level (median level n mmol/L (IQR))                                                             | N = 2549<br>6.3 (4.5 – 9.3)<br>p = 0.87    | N = 4776<br>6.2 (4.5 – 9.2)                      | N = 115<br>12.6 (7.9 – 25.3)<br>p < 0.000 |
| eGFR rate using 2021 CKD-epi creatinine equation in (median clearance in ml/min/1.73 m <sup>3</sup> (IQR)) | N = 2656<br>64 (45 – 90)<br>p < 0.001      | N = 4983<br>68 (46 – 94)                         | N = 125<br>41 (24 – 71)<br>p < 0.001      |
| CT-severity score (mean score (SD))                                                                        | N = 909<br>12.4 (±5.5)<br>p = 0.58         | N = 1401<br>12.1 (±5.6)                          | N = 30<br>14.5 (±7.2)<br>p = 0.06         |
| Blood CRP level (median level in mg/L (IQR))                                                               | N = 2646<br>93.1 (49.0 – 154)<br>p < 0.001 | N = 4939<br>70.8 (28.0 – 131)                    | N = 123<br>75.0 (29.0 – 148)<br>P = 1.00  |
| Blood LDH level (median level in U/L (IQR))                                                                | N = 2238<br>349 (268 – 471)<br>p < 0.001   | N = 4226<br>323 (247 – 426)                      | N = 89<br>363 (255 – 447)<br>p = 0.52     |

|                            |                                                    |                             |                                                   |
|----------------------------|----------------------------------------------------|-----------------------------|---------------------------------------------------|
| MEWS (median score (IQR))  | N = 2337<br>3.0 (2.0 – 4.0)<br><b>p &lt; 0.001</b> | N = 4055<br>3.0 (2.0 – 4.0) | N = 103<br>4.0 (2.0 – 5.0)<br><b>p &lt; 0.001</b> |
| qSOFA (median score (IQR)) | N = 2373<br>1.0 (0.0 – 1.0)<br>p = 1.00            | N = 4131<br>1.0 (0.0 – 1.0) | N = 104<br>1.0 (1.0 – 1.0)<br><b>p &lt; 0.001</b> |

SBP = systolic blood pressure; HR = heart rate; eGFR = estimated glomerular filtration rate; CKD-epi = chronic kidney disease Epidemiology Collaboration; CT = computed tomography; BPM = beats per minute; IQR = interquartile range; SD = standard deviation; CRP = c-reactive protein; LDH = lactate dehydrogenase; MEWS = modified early warning score; sSOFA = quick sequential organ failure assessment. % = percentage of patients in this group with indicated characteristic. Significance was assessed using a Kruskal Wallis test with post-hoc correction (for numerical data) or Chi-square test (for categorical data). *p* – values for all groups indicate significance when compared to the normonatremia group. When no *p* – value was provided there was no significant difference to the normonatremia group. Subgroup analyses for hyponatremia is provided in the supplemental information.

**Table 3** – Comparison of clinical outcomes between COVID-19 patients with hypo-, normo-, and hypernatremia

| Outcome                                                                          | Hyponatremia<br>Na 134 mmol/L<br>N = 2677                   | Normonatremia<br>Na 136 – 145 mmol/L<br>N = 5008 | Hypernatremia<br>Na 146 mmol/L<br>N = 126                 |
|----------------------------------------------------------------------------------|-------------------------------------------------------------|--------------------------------------------------|-----------------------------------------------------------|
| Death or palliative discharge (N (%))                                            | 405 / 2360 (17.2 %)<br>^AOR 1.04 (0.91 – 1.20)<br>p = 0.56  | 729 / 4568 (16.0 %)                              | 42 / 119 (35.3 %)<br>^AOR 2.25 (1.49 – 3.41)<br>p < 0.001 |
| ICU-admission (N (%)),<br>'do not intubate' excluded                             | 439 / 1923 (22.8 %)<br>^AOR 1.27 (1.11 – 1.46)<br>p < 0.001 | 710 / 3778 (18.8 %)                              | 32 / 80 (40.0%)<br>^AOR 2.89 (1.83 – 4.58)<br>p < 0.001   |
| Invasive ventilation (N (%)),<br>'do not intubate' excluded                      | 352 / 1889 (18.6 %)<br>^AOR 1.12 (0.97 – 1.30)<br>p = 0.121 | 623 / 3706 (16.8 %)                              | 29 / 77 (37.7 %)<br>^AOR 2.95 (1.834 – 4.74)<br>p < 0.001 |
| Discharge alive within 42 days; N indicating<br>the number of non-censored cases | N = 1527<br>^HR 0.96 (0.90 – 1.02)<br>p = 0.15              | N = 2747                                         | N = 52<br>^HR 0.78 (0.59 – 1.03)<br>p = 0.08              |
| <b>Complications</b>                                                             | <b>Na 134 mmol/L<br/>N = 1821</b>                           | <b>Na 136 – 145 mmol/L<br/>N = 3206</b>          | <b>Na 146 mmol/L<br/>N = 82</b>                           |
| Bacterial pneumonia (N (%))                                                      | 289 / 2212 (13.1 %)<br>^AOR 1.12 (0.96 – 1.31)<br>p = 0.14  | 501 / 4307 (11.6 %)                              | 18 / 109 (16.5 %)<br>^AOR 1.44 (0.85 – 2.40)<br>p = 0.17  |
| Aspergillosis pneumonia (N (%))                                                  | 67 / 1915 (3.5 %)<br>^AOR 1.44 (1.03 – 1.99)<br>p = 0.031   | 83 / 3442 (2.4 %)                                | 5 / 90 (5.6 %)<br>^AOR 2.26 (0.89 – 5.74)<br>p = 0.084    |
| ARDS (N (%))                                                                     | 224 / 2223 (10.1 %)<br>^AOR 1.08 (0.91 – 1.29)<br>p = 0.377 | 404 / 4323 (9.3 %)                               | 17 / 110 (15.5 %)<br>^AOR 1.78 (1.05– 3.04)<br>p = 0.033  |
| Treatment for septic shock (N (%)) *                                             | 94 / 2153 (4.4 %)<br>^AOR 1.33 (1.01 – 1.74)<br>p = 0.04    | 135 / 4175 (3.2 %)                               | 12 / 109 (11.0 %)<br>^AOR 3.37 (1.80 – 6.33)<br>p < 0.001 |

1  
2  
3  
4  
5  
6  
7  
8  
9  
10  
11  
12  
13  
14  
15  
16  
17  
18  
19  
20  
21  
22  
23  
24  
25  
26  
27  
28  
29  
30  
31  
32  
33  
34  
35  
36  
37  
38  
39  
40  
41  
42  
43  
44  
45  
46

|                                  |                                                             |                     |                                                           |
|----------------------------------|-------------------------------------------------------------|---------------------|-----------------------------------------------------------|
| Congestive heart failure (N (%)) | 64 / 2235 (2.9 %)<br>^AOR 0.95 (0.70 – 1.29)<br>p = 0.73    | 125 / 4352 (2.9 %)  | 2 / 111 (1.8 %)<br>^AOR 0.48 (0.12 – 1.96)<br>p = 0.31    |
| Physical decline (N (%))         | 576 / 2116 (27.2 %)<br>^AOR 1.22 (1.08 – 1.38)<br>p < 0.001 | 950 / 4126 (23.0 %) | 30 / 106 (28.3 %)<br>^AOR 1.18 (0.77 – 1.82)<br>p = 0.44  |
| Delirium (N (%))                 | 237 / 2136 (11.1 %)<br>^AOR 0.99 (0.83 - 1.17)<br>p = 0.88  | 451 / 4146 (10.5 %) | 27 / 107 (25.7 %)<br>^AOR 2.25 (1.42 – 3.56)<br>p < 0.001 |

ICU = Intensive care unit; ARDS = acute respiratory distress syndrome. ^AOR = adjusted odds ratio; odds ratio adjusted for sex assigned at birth, age, a history of chronic kidney disease, and a history of hypertension. ^AHR = adjusted hazard ratio; hazard ratio adjusted for sex assigned at birth, age, a history of chronic kidney disease, and a history of hypertension \* Treatment for septic shock was defined as the need for vasopressors in order to maintain mean arterial blood pressure >65 mmHg and blood lactate level >2 mmol/L, in the absence of other causes including hypovolemia. Significance was assessed using a cox proportional-hazard model at the mean of the covariates (discharge alive) or logistic regression (all other values). p – values for all groups indicate significance when compared to the normonatremia group.

1  
2  
3 **Corresponding author:**  
4

5 Lianne R. de Haan

6  
7 [Lr.de.haan@nwz.nl](mailto:Lr.de.haan@nwz.nl)

8  
9 Hospitaalweg 1

10  
11 1315 RA Almere

12  
13 The Netherlands  
14  
15

16 **Alternative proofreader:**  
17

18 Renée A. Douma

19  
20 [rdouma@flevoziekenhuis.nl](mailto:rdouma@flevoziekenhuis.nl)  
21  
22  
23  
24  
25  
26  
27  
28  
29  
30  
31  
32  
33  
34  
35  
36  
37  
38  
39  
40  
41  
42  
43  
44  
45  
46  
47  
48  
49  
50  
51  
52  
53  
54  
55  
56  
57  
58  
59  
60

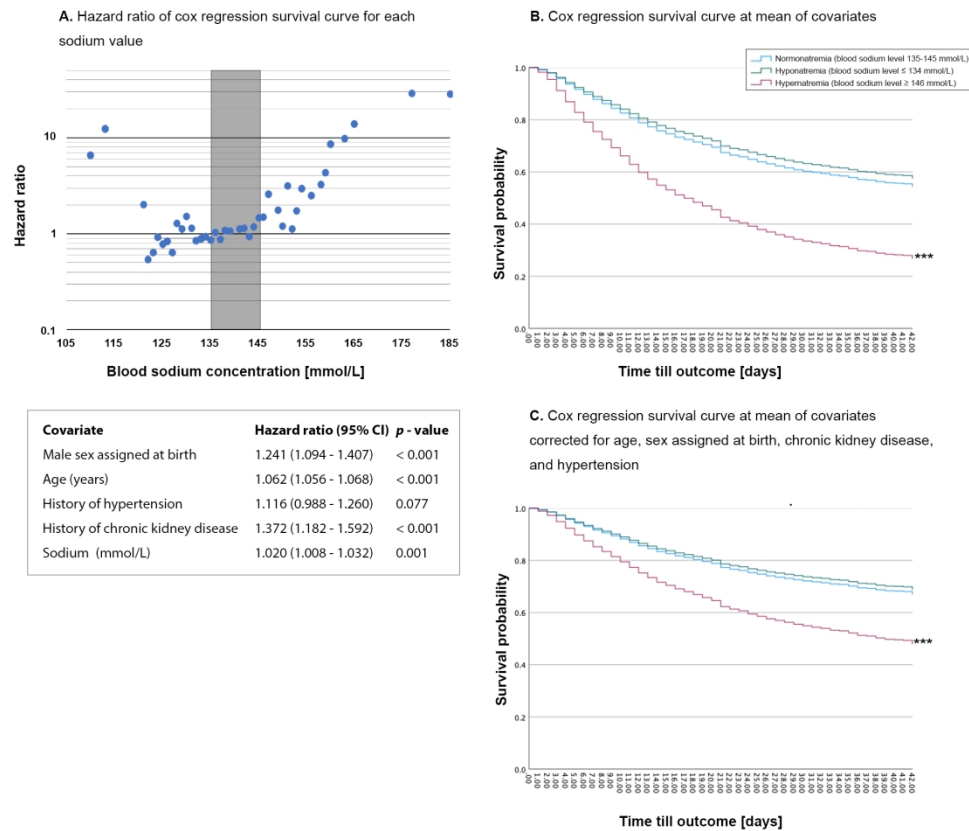

Figure 1. Hazard ratios of cox proportional survival curves for survival probability for each sodium value adjusted for age, sex assigned at birth, a history of chronic kidney disease, and a history of hypertension.

The grey area indicates the normonatremia. Table shows hazard ratios for covariates and sodium as a continuous variable (A). Cox proportional survival curves at the mean of covariates for (B) unadjusted 6-week mortality stratified by normo-, hypo-, and hypernatremia, (C) 6-week mortality adjusted for age, sex assigned at birth, a history of chronic kidney disease, and a history of hypertension stratified in normo-, hypo-, and hypernatremia. \*\*\* indicates a p-value < 0.001

172x145mm (300 x 300 DPI)

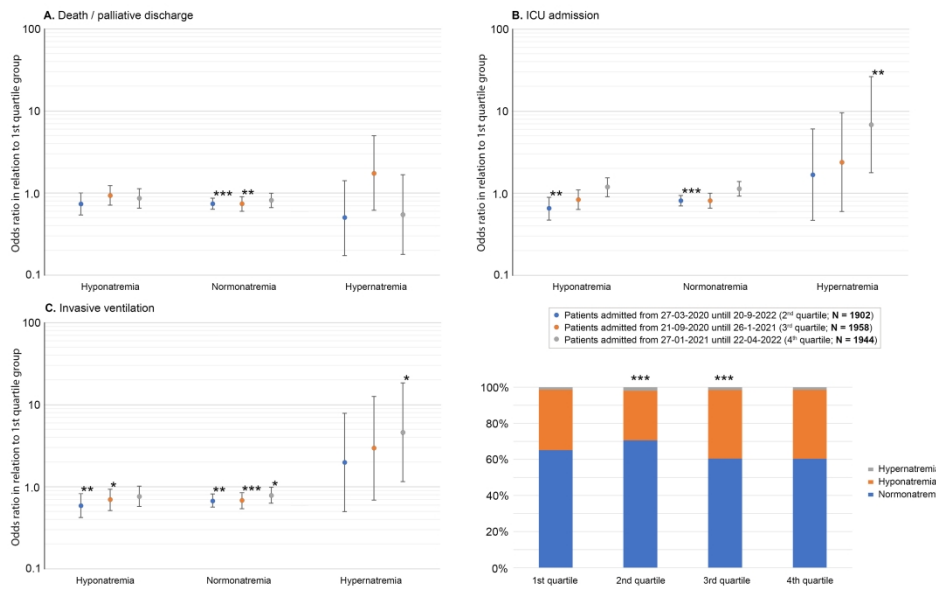

Figure 2. Odds ratio for adverse outcomes (death / palliative discharge (A), intensive care unit admission (B) invasive ventilation (C)) in each quartile compared to patients in the first quartile (admitted before 27-03-2020; N = 2002) for patients with hypo-, hyper-, or normonatremia at admission. \* Indicates a p-value <0.05, \*\* indicates a p-value < 0.01, \*\*\* indicates a p-value <0.001 for the odds ratio as calculated by binary logistic regression. (D) incidence of hypo-, normo-, and hypernatremia in each quartile, \*\*\* indicates a p-value <0.001 as compared to the first quartile for the chi-square statistic with Bonferroni post-hoc correction.

375x227mm (300 x 300 DPI)



1  
2  
3  
4  
5  
6  
7  
8  
9  
10  
11  
12  
13  
14  
15  
16  
17  
18  
19  
20  
21  
22  
23  
24  
25  
26  
27  
28  
29  
30  
31  
32  
33  
34  
35  
36  
37  
38  
39  
40  
41  
42  
43  
44  
45  
46  
47  
48  
49  
50  
51  
52  
53  
54  
55  
56  
57  
58  
59  
60

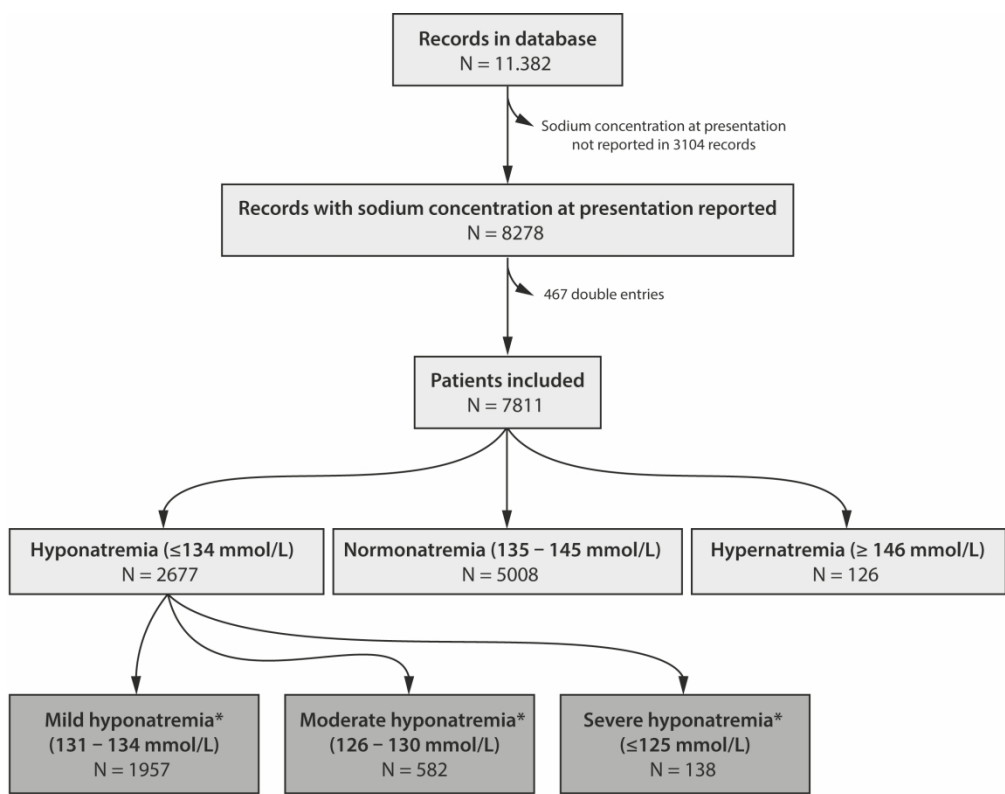

205x167mm (300 x 300 DPI)

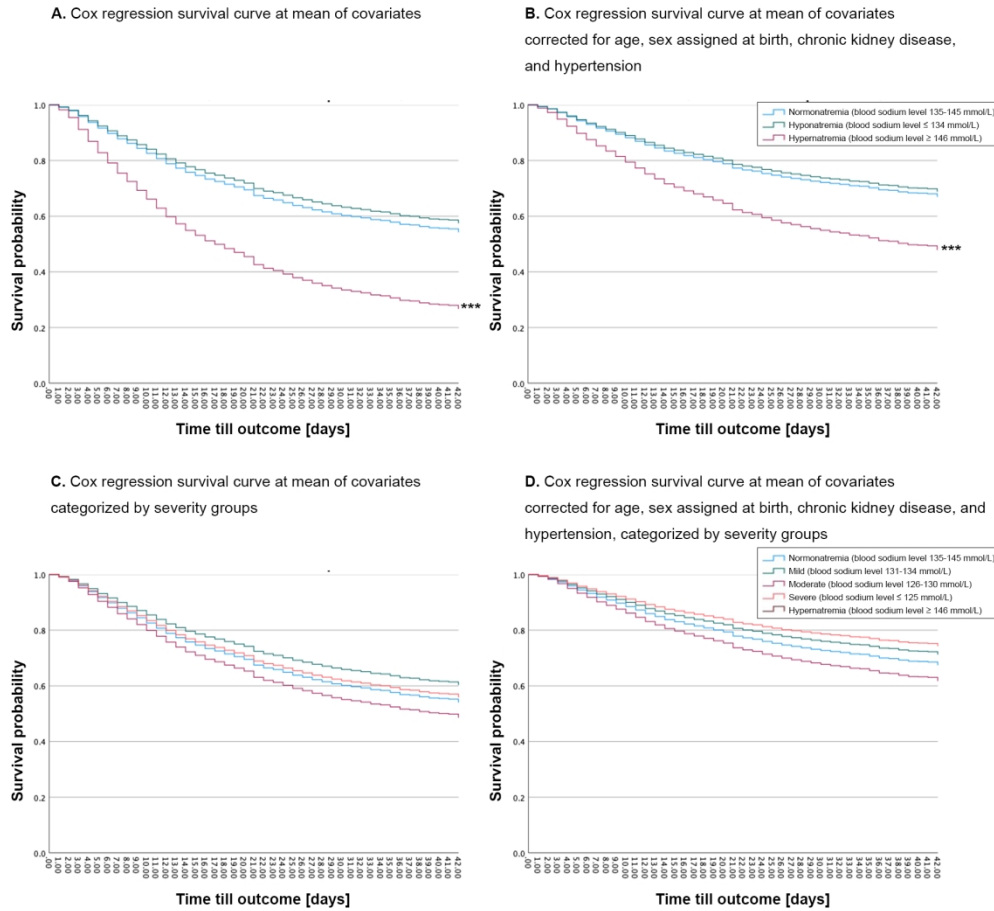

Supplemental Figure 2. Cox proportional survival curves at the mean of covariates for (A) unadjusted 6-week mortality categorized by normo-, hypo-, and hypernatremia, (B) 6-week mortality adjusted for age, sex assigned at birth, a history of chronic kidney disease, and a history of hypertension stratified in normo-, hypo-, and hypernatremia, (C) unadjusted 6-week mortality stratified in normo- and hypernatremia and mild, moderate, and severe hyponatremia, and (D) 6-week mortality adjusted for age, sex assigned at birth, a history of chronic kidney disease, and a history of hypertension stratified in normo- and hypernatremia and mild, moderate, and severe hyponatremia. \* Indicates a p-value <0.05, \*\*\* indicates a p-value <0.001

161x150mm (300 x 300 DPI)

# Outcomes of COVID-19 patients presenting with dysnatremia: an observational study

## Supplemental information

L.R. de Haan<sup>a, f1, \*</sup>, M. ten Wolde<sup>a</sup>, M. Beudel<sup>b</sup>, R.H. Olde Engberink<sup>c</sup>, B. Appelman<sup>c</sup>, E.K. Haspels-Hogervorst<sup>d</sup>, D. Rusch<sup>d</sup>, N.C. Gritters-van den Oever<sup>e</sup>, S. Simsek<sup>f1</sup>, N. Paternotte<sup>f2</sup>, J.P. van den Bergh<sup>g</sup>, C.E. Wyers<sup>g</sup>, M. de Kruijf<sup>h1</sup>, T. Dormans<sup>h2</sup>, H. Moeniralam<sup>i</sup>, N. Bokhizzou<sup>j</sup>, K. Brinkman<sup>k</sup>, R.A. Douma<sup>a</sup>,

<sup>a</sup> *Department of Internal Medicine, Flevo Hospital, Almere, the Netherlands*

<sup>b</sup> *Department of Neurology, Amsterdam University Medical Centre*

<sup>c</sup> *Center of Experimental and Molecular Medicine (C.E.M.M.), Location Academic Medical Center, Amsterdam UMC, Amsterdam, The Netherlands.*

<sup>d</sup> *Intensive care department, Martini Hospital, Groningen, the Netherlands*

<sup>e</sup> *Intensive care department, Treant Hospitals, Hoogeveen, Emmen, and Stadskanaal, the Netherlands*

<sup>f1</sup> *Department of Internal Medicine, Northwest Clinics, Alkmaar, the Netherlands*

<sup>f2</sup> *Department of Pulmonary diseases, Northwest Clinics, Alkmaar, the Netherlands*

<sup>g</sup> *Department of Internal Medicine, VieCuri Medical Centre, Venlo, the Netherlands*

<sup>h1</sup> *Department of Pulmonary diseases, Zuyderland Medical Centre, Heerlen, the Netherlands*

<sup>h2</sup> *Department of Intensive Care, Zuyderland Medical Centre, Heerlen, the Netherlands*

<sup>i</sup> *Department of Internal Medicine, St. Antonius Hospital, Nieuwegein, the Netherlands*

<sup>j</sup> *Department of Internal Medicine, BovenIJ hospital, Amsterdam, the Netherlands*

<sup>k</sup> *Department of Internal Medicine, Onze Lieve Vrouwe Gasthuis, Amsterdam, the Netherlands*

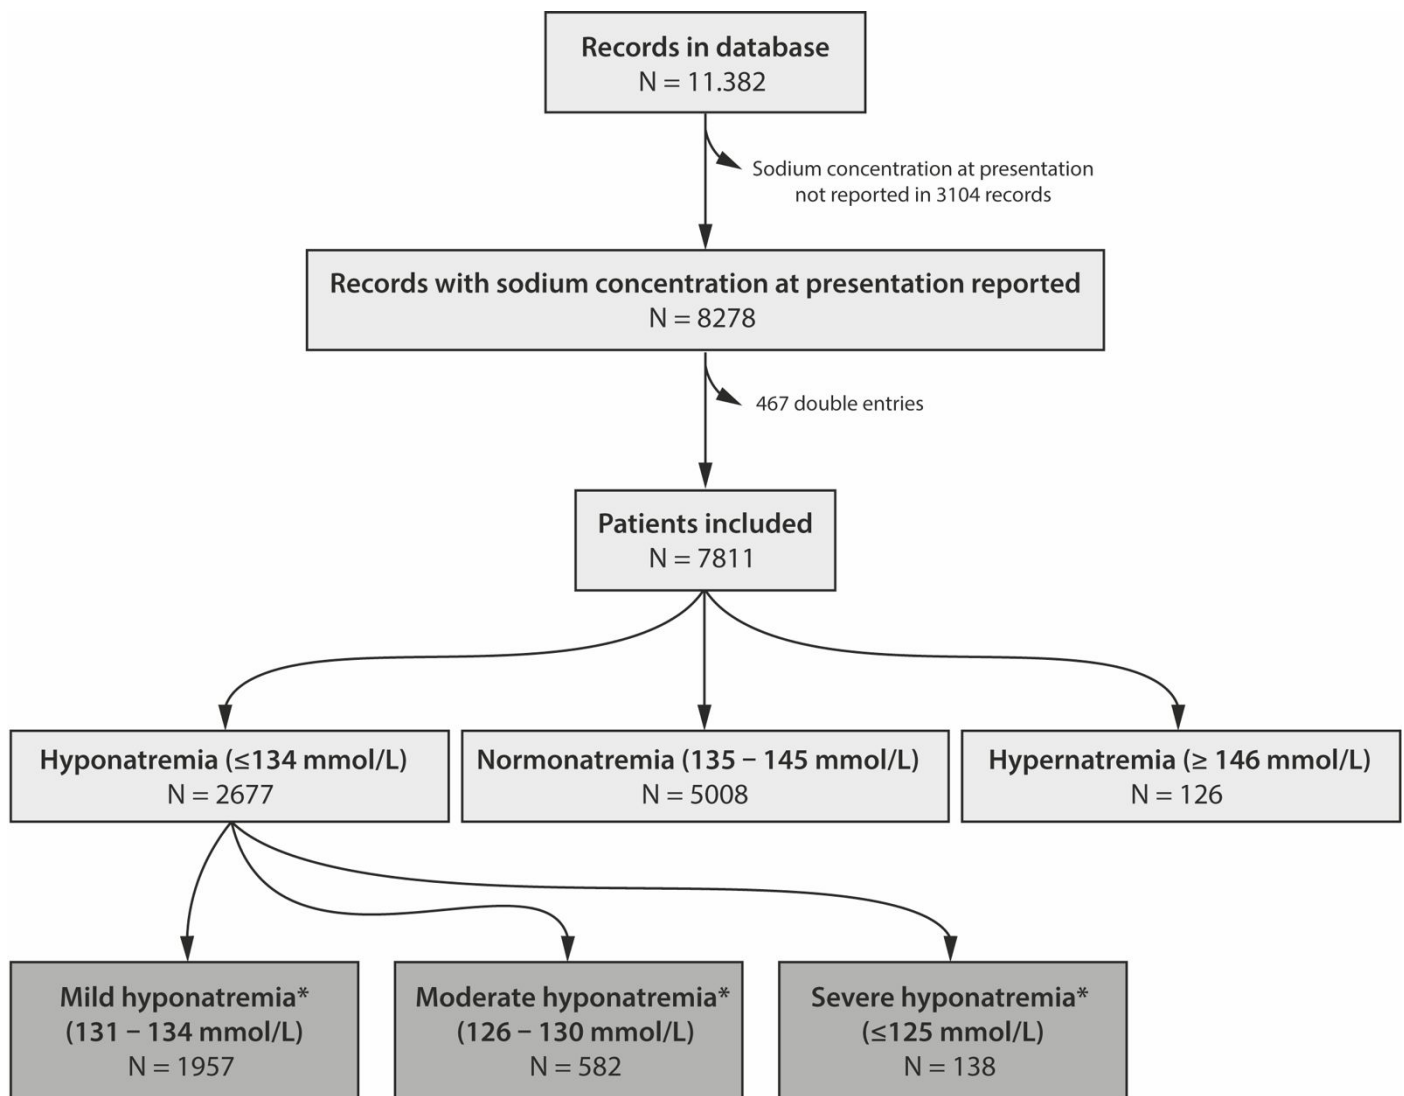

41 **Supplemental Figure 1.** Flow chart of included patients. Sodium concentrations indicate corrected serum sodium concentrations at hospital presentation \* indicates  
42 the subgroup analysis as provided in the supplemental information.

**Supplemental Table 1** – Subgroup analysis of patient characteristics

| <b>Comorbidity</b>        | <b>Included diseases</b>                                                                                                                                                                                                                                                                                                                                                                                                                                                                                                                                                                                                                                                                                                                                                                                                                                                                                       |
|---------------------------|----------------------------------------------------------------------------------------------------------------------------------------------------------------------------------------------------------------------------------------------------------------------------------------------------------------------------------------------------------------------------------------------------------------------------------------------------------------------------------------------------------------------------------------------------------------------------------------------------------------------------------------------------------------------------------------------------------------------------------------------------------------------------------------------------------------------------------------------------------------------------------------------------------------|
| Chronic pulmonary disease | Alpha-1 trypsin deficiency; asbestosis; cryptogenic organizing pneumonia; lymphangioleiomyomatosis; lung disease immunodeficiency and chromosome breakage syndrome; bronchopulmonary dysplasia; primary ciliary dyskinesia; bronchiectasis; cystic fibrosis; chronic bronchitis or emphysema; lung fibrosis; sarcoidosis; obstructive sleep apnea; pulmonary hypertension                                                                                                                                                                                                                                                                                                                                                                                                                                                                                                                                      |
| Chronic cardiac disease   | <b>Chronical heart disease:</b> Myocardial infarction; Cardiac arrhythmias (AVNRT, atrial fibrillation, (supra)ventricular tachycardia, ventricular tachycardia, brugada syndrome, sick sinus syndrome, wolf parkinson white syndrome; decompensated heart failure, cardiomyopathy; valve disease (aortic valve stenosis, aortic valve insufficiency<br><b>Congential heart disease:</b> aortic valve insufficiency or aortic valve stenosis; Atrial septal defect or ventricular septal defect; hypoplastic left heart syndrome; Ebstein’s anomaly; patent ductus arteriosus; tetralogy of Fallot; transposition of the great vessels                                                                                                                                                                                                                                                                         |
| Chronic kidney disease    | Acute tubulointerstitial nephritis; hemolytic uremic syndrome (HUS); amyloidosis; Anti-glomerular basement membrane disease; bartter syndrome; kidney damage due to medication, chronic bladder infections / kidney infections / diabetes, high blood pressure, arteriosclerosis; cryoglobulinemia, renal cystic disease; cystinosis; dense deposit disease (DDD); Focal segmental glomerulosclerosis (FSGS); Gitelman syndrome; glomerulonephritis; HNF1beta associated kidney disease; renal fusion (horseshoe kidney); IgA nephropathy; medullary sponge kidney; membranous nephropathy; minimal change disease; solitary kidney; Nail-patella syndrome (NPS); nephrogenic diabetes insipidus; nephroptosis; nephrotic syndrome; renal angioliipoma; renal cell carcinoma; primary hyperoxaluria; reflux nephropathy; atrophic kidney; scleroderma; lupus nephritis; Alport’s syndrome; systemic vasculitis |
| Chronic liver disease     | Liver disease that caused cirrhosis (e.g. Budd Chiari, hemochromatosis, hepatitis, Wilson’s disease)                                                                                                                                                                                                                                                                                                                                                                                                                                                                                                                                                                                                                                                                                                                                                                                                           |

**Supplemental Table 2 – Subgroup analysis of patient characteristics**

|                                             | Na 135 – 145 mmol/L<br>N = 5008    | Na 134 mmol/L<br>N = 2677           | Na 131 – 134 mmol/L<br>N = 1957     | Na 126 – 130 mmol/L<br>N = 582    | Na 125 mmol/L<br>N = 138          |
|---------------------------------------------|------------------------------------|-------------------------------------|-------------------------------------|-----------------------------------|-----------------------------------|
| Sex assigned at birth (N (%))               | ♂ 2946 (58.8 %)<br>♀ 2060 (41.2 %) | ♂ 1673 (62.5%) **<br>♀ 1003 (37.5%) | ♂ 1249 (63.9%) ***<br>♀ 707 (36.1%) | ♂ 363 (62.4%)<br>♀ 219 (37.6%)    | ♂ 61 (44.2%) ***<br>♀ 77 (55.8%)  |
| Age (median age in years (IQR))             | N = 5008<br>66.1 (55.0-76.0)       | N = 2675<br>67.0 (58.0-77.0) **     | N = 1956<br>67.0 (57.0 – 76.0)      | N = 581<br>68.1 (60.0 – 78.0) *** | N = 138<br>70.6 (62.0 – 79.3) *** |
| BMI (median BMI in kg/m <sup>2</sup> (IQR)) | N = 3374<br>27.7 (24.6 – 31.6)     | N = 1740<br>27.2 (24.2 – 31.1) **   | N = 1271<br>27.4 (24.4 – 31.5)      | N = 379<br>26.3 (23.4 – 30.3) *** | N = 90<br>26.9 (23.7 – 30.9)      |
| Order 'Do not intubate' (N (%))             | 796 / 2469 (32.2 %)                | 440 / 1442 (30.5 %)                 | 304 / 1043 (29.1 %)                 | 108 / 322 (33.5 %)                | 28 / 77 (36.4 %)                  |
| Chronic cardiac disease (N (%))             | 1334 / 4982 (26.8 %)               | 760 / 2666 (28.5%)                  | 541 / 1948 (27.8 %)                 | 187 / 581 (32.2 %)                | 32 / 137 (23.4 %)                 |
| Hypertension (N (%))                        | 1889 / 4586 (41.2 %)               | <b>1055 / 2374 (44.4 %) **</b>      | 749 / 1735 (43.2 %)                 | 240 / 520 (46.2 %)                | <b>66 / 119 (55.5 %) **</b>       |
| Chronic pulmonary disease (N (%))           | 844 / 4979 (17.0 %)                | 466 / 2662 (17.5 %)                 | 328 / 1945 (16.9 %)                 | 111 / 580 (19.1 %)                | 27 / 137 (19.7 %)                 |
| Chronic kidney disease (N (%))              | 491 / 4587 (10.7 %)                | 329 / 2379 (13.8 %) ***             | 220 / 1738 (12.7 %)                 | 92 / 522 (17.6 %) ***             | 17 / 119 (14.3 %)                 |
| Moderate to severe liver disease (N (%))    | 50 / 4972 (1.0 %)                  | 30 / 2662 (1.1%)                    | 25 / 1947 (1.3%)                    | 3 / 579 (0.5 %)                   | 2 / 136 (1.5%)                    |
| Diabetes (N (%))                            | 1261 / 4972 (25.4 %)               | 664 / 2662 (24.9 %)                 | 481 / 1946 (24.7 %)                 | 148 / 579 (25.6 %)                | 35 / 137 (25.5 %)                 |
| Immunosuppressives (N (%))                  | 295 / 4445 (6.6 %)                 | 192 / 2283 (8.4 %) **               | 129 / 1669 (7.7 %)                  | 56 / 497 (11.3 %) **              | 7 / 117 (6.0 %)                   |
| Thiazide diuretics (N (%))                  | 394 / 4994 (7.9 %)                 | 258 / 2671 (9.7 %) **               | 186 / 1953 (9.5 %)                  | 55 / 580 (9.5 %)                  | 17 / 138 (12.3 %)                 |
| Loop diuretics (N (%))                      | 389 / 4994 (7.8 %)                 | 187 / 2671 (7.0 %)                  | 128 / 1953 (6.6 %)                  | 50 / 580 (8.6 %)                  | 9 / 138 (6.5 %)                   |
| SSRIs (N (%))                               | 164 / 4994 (3.3 %)                 | 78 / 2671 (2.9 %)                   | 53 / 1953 (2.7%)                    | 15 / 580 (2.6%)                   | 10 / 138 (7.2 %)                  |

BMI = body mass index; IQR = interquartile range; % = percentage of patients in this group with indicated characteristic; SSRI = Selective Serotonin Reuptake inhibitor. SNRI = Selective Serotonin and Noradrenalin Reuptake inhibitor. Significance was assessed using a Kruskal Wallis test with post-hoc correction (for numerical data; non-normally distributed) or Chi-square test (for categorical data). p – values for all groups indicate the adjusted significance after post-hoc correction when compared to the normonatremia group. \* Indicates a p-value <0.05, \*\* indicates a p-value <0.01, \*\*\* indicates a p-value <0.001

**Supplemental Table 3** – Subgroup analysis of signs and symptoms

| Signs and symptoms                                                                                         | Na 135 – 145 mmol/L<br>N = 3206 | Na 134 mmol/L<br>N = 1821         | Na 131 – 134 mmol/L<br>N = 1346   | Na 126 – 130 mmol/L<br>N = 383  | Na 125 mmol/L<br>N = 92      |
|------------------------------------------------------------------------------------------------------------|---------------------------------|-----------------------------------|-----------------------------------|---------------------------------|------------------------------|
| Nausea / vomiting (N (%))                                                                                  | 1150 / 4129 (27.9 %)            | 679 / 2273 (29.9 %)               | 490 / 1663 (29.5 %)               | 151 / 499 (30.3 %)              | 38 / 111 (34.2%)             |
| Diarrhea (N (%))                                                                                           | 1146 / 4157 (27.6 %)            | 804 / 2298 (35.0%) ***            | 574 / 1686 (34.0 %) ***           | 180 / 501 (35.9%) ***           | 50 / 111 (45.0 %) ***        |
| Anosmia (N (%))                                                                                            | 352 / 3330 (10.6 %)             | 244 / 1904 (12.8 %)**             | 174 / 1395 (12.5 %)               | 62 / 420 (14.8 %)               | 8 / 89 (9.0 %)               |
| Confusion (N (%))                                                                                          | 651 / 4381 (14.9 %)             | 311 / 2319 (13.4%)                | 207 / 1688 (12.3 %)               | 78 / 511 (15.3 %)               | 26 / 120 (21.7 %)            |
| Seizures (N (%))                                                                                           | 31 / 3452 (0.9 %)               | 10 / 1977 (0.5%)                  | 6 / 1448 (0.4 %)                  | 2 / 434 (0.5 %)                 | 2 / 95 (2.1 %)               |
| FiO <sub>2</sub> (median fraction (IQR))                                                                   | N = 2084<br>0.36 (0.28 – 0.50)  | N = 1159<br>0.36 (0.28 – 0.50)    | N = 848<br>0.36 (0.28 – 0.48)     | N = 258<br>0.36 (0.32 – 0.60)   | N = 53<br>0.36 (0.31 – 0.75) |
| SBP (mean SBP in mmHg (SD))                                                                                | N = 2648<br>132 (± 22)          | N = 4971<br>135 (±23)***          | N = 1934<br>132 (±22) ***         | N = 578<br>132 (±22)**          | N = 136<br>138 (±27)         |
| HR (mean HR in BPM (SD))                                                                                   | N = 4965<br>91 (±20)            | N = 2661<br>92 (±18) **           | N = 1946<br>92 (±18) *            | N = 580<br>92 (±18)             | N = 135<br>90 (±19)          |
| Disturbed capillary refill (N (%))                                                                         | 93 / 1369 (6.8 %)               | 81 / 863 (9.4 %)                  | 51 / 614 (8.3 %)                  | 27 / 206 (13.1 %)               | 3 / 43 (7.0 %)               |
| Blood urea level (median level n mmol/L (IQR))                                                             | N = 4776<br>6.2 (4.5 – 9.2)     | N = 2549<br>6.3 (4.5 – 9.3)       | N = 1892<br>6.3 (4.6 – 9.1)       | N = 559<br>6.2 (4.5 – 10.2)     | N = 128<br>5.5 (4.2 – 9.8)   |
| eGFR rate using 2021 CKD-epi creatinine equation in (median clearance in ml/min/1.73 m <sup>3</sup> (IQR)) | N = 4983<br>68 (46 – 94)        | N = 2656<br>64 (45 – 90) ***      | N = 1944<br>64 (46 – 89) ***      | N = 575<br>63 (41 – 90) ***     | N = 137<br>79 (46 – 92)      |
| CT-severity score (mean score (SD))                                                                        | N = 1401<br>12.1 (±5.6)         | N = 909<br>12.4 (±5.5)            | N = 684<br>12.3 (±5.4)            | N = 190<br>12.6 (±5.4)          | N = 35<br>12.5 (±6.7)        |
| Blood CRP level (median level in mg/L (IQR))                                                               | N = 4939<br>70.8 (28.0 – 131)   | N = 2646<br>93.1 (49.0 – 154) *** | N = 1933<br>93.0 (48.2 – 151) *** | N = 577<br>103 (54.6 – 166) *** | N = 136<br>82.5 (36.0 – 145) |
| Blood LDH level (median level in U/L (IQR))                                                                | N = 4226<br>323 (247 – 426)     | N = 2238<br>349 (268 – 471) ***   | N = 1651<br>346 (269 – 467) ***   | N = 479<br>361 (269 – 482) ***  | N = 108<br>331 (240 – 543)   |
| Modified early warning score (MEWS) (median score (IQR))                                                   | N = 4055<br>3.0 (2.0 – 4.0)     | N = 2337<br>3.0 (2.0 – 4.0) ***   | N = 1709<br>3.0 (2.0 – 4.0) ***   | N = 509<br>3.0 (2.0 – 4.0)      | N = 119<br>3.0 (2.0 – 4.0)   |
| Quick sequential organ failure assessment (median score (IQR))                                             | N = 4131<br>1.0 (0.0 – 1.0)     | N = 2373<br>(0.0 – 1.0)           | N = 1735<br>1.0 (0.0 – 1.0)       | N = 517<br>1.0 (0.0 – 1.0)      | N = 121<br>1.0 (0.0 – 1.0)   |

SBP = systolic blood pressure; HR = heart rate; CKD-epi = chronic kidney disease Epidemiology Collaboration BPM = beats per minute; IQR = interquartile range; SD = standard deviation; CRP = c-reactive protein; LDH = lactate dehydrogenase; % = percentage of patients in this group with indicated characteristic. Significance was assessed using a Kruskal wallis test with post-hoc correction (for numerical data) or Chi-square test (for categorical data). \* Indicates a p-value <0.05, \*\* indicates a p-value <0.01, \*\*\* indicates a p-value <0.001

A. Cox regression survival curve at mean of covariates

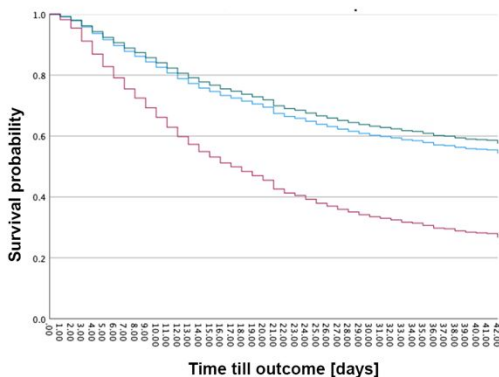

B. Cox regression survival curve at mean of covariates corrected for age, sex assigned at birth, chronic kidney disease, and hypertension

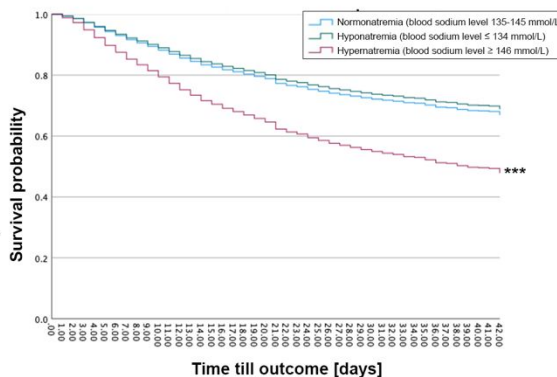

C. Cox regression survival curve at mean of covariates categorized by severity groups

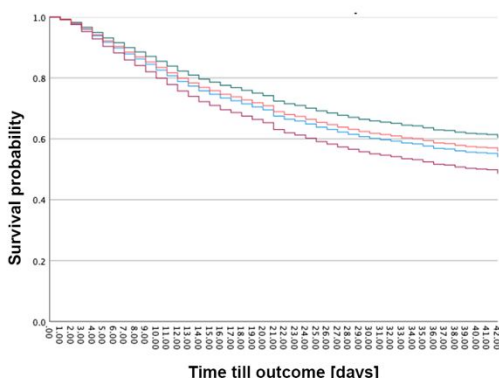

D. Cox regression survival curve at mean of covariates corrected for age, sex assigned at birth, chronic kidney disease, and hypertension, categorized by severity groups

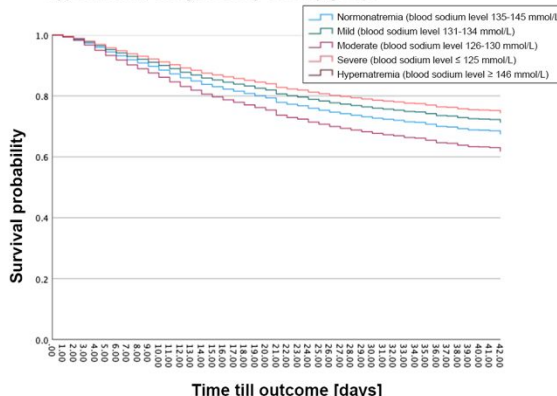

**Supplemental Figure 2.** Cox proportional survival curves at the mean of covariates for (A) unadjusted 6-week mortality categorized by normo-, hypo-, and hypernatremia, (B) 6-week mortality adjusted for age, sex assigned at birth, a history of chronic kidney disease, and a history of hypertension stratified in normo-, hypo-, and hypernatremia, (C) unadjusted 6-week mortality stratified in normo- and hypernatremia and mild, moderate, and severe hyponatremia, and (D) 6-week mortality adjusted for age, sex assigned at birth, a history of chronic kidney disease, and a history of hypertension stratified in normo- and hypernatremia and mild, moderate, and severe hyponatremia. \* Indicates a p-value <0.05, \*\*\* indicates a p-value <0.001



**Supplemental Table 4** – Subgroup analysis of outcome and complications

| Outcome                                                                             | Na 135 – 145 mmol/L<br>N = 3206 | Na 134 mmol/L<br>N = 1821                                       | Na 131 – 134 mmol/L<br>N = 1346                                | Na 126 – 130 mmol/L<br>N = 383                                 | Na 125 mmol/L<br>N = 92                                    |
|-------------------------------------------------------------------------------------|---------------------------------|-----------------------------------------------------------------|----------------------------------------------------------------|----------------------------------------------------------------|------------------------------------------------------------|
| Death or palliative discharge (N (%))                                               | 729 / 4568 (16.0 %)             | 405 / 2360 (17.2 %)<br><sup>A</sup> OR 1.042 (0.906 – 1.200)    | 269 / 1723 (15.6 %)                                            | 115 / 518 (22.2 %)                                             | 21 / 119 (17.6 %)                                          |
| ICU-admission (N (%)),<br>'do not intubate' excluded                                | 710 / 3778 (18.8 %)             | 439 / 1923 (22.8 %)<br><sup>A</sup> OR 1.274 (1.112 – 1.458)*** | 314 / 1422 (22.1 %)<br><sup>A</sup> OR 1.205 (1.036 – 1.401)*  | 104 / 410 (25.4 %)<br><sup>A</sup> OR 1.487 (1.170 – 1.889)*** | 21 / 91 (23.1 %)<br><sup>A</sup> OR 1.431 (0.868 – 2.360)  |
| Invasive ventilation (N (%)),<br>'do not intubate' excluded                         | 623 / 3706 (16.8 %)             | 352 / 1889 (18.6 %)<br><sup>A</sup> OR 1.122 (0.970 – 1.298)    | 250 / 1396 (17.9 %)                                            | 85 / 402 (21.1 %)                                              | 17 / 91 (18.7 %)                                           |
| Discharge alive within 42 days; N<br>indicating the number of non-censored<br>cases | N = 2747                        | N = 1527<br><sup>A</sup> HR 0.955 (0.897 – 1.017)<br>p = 0.154  | N = 1153                                                       | N = 302                                                        | N = 72                                                     |
| Complications                                                                       | Na 135 – 145 mmol/L<br>N = 3206 | Na 134 mmol/L<br>N = 1821                                       | Na 131 – 134 mmol/L<br>N = 1346                                | Na 126 – 130 mmol/L<br>N = 383                                 | Na 125 mmol/L<br>N = 92                                    |
| Bacterial pneumonia (N (%))                                                         | 501 / 4307 (11.6 %)             | 289 / 2212 (13.1 %)<br><sup>A</sup> OR 1.123 (0.962 – 1.312)    | 207 / 1619 (12.8 %)                                            | 72 / 483 (14.9 %)                                              | 10 / 110 (9.1 %)                                           |
| Aspergillosis pneumonia (N (%))                                                     | 83 / 3456 (2.4 %)               | 67 / 1915 (3.5 %)<br><sup>A</sup> OR 1.436 (1.034 – 1.993)      | 49 / 1402 (3.5 %)<br><sup>A</sup> OR 1.426 (0.995 – 2.044)     | 14 / 417 (3.4 %)<br><sup>A</sup> OR 1.352 (0.759 – 2.410)      | 4 / 96 (4.2 %)<br><sup>A</sup> OR 1.839 (0.657 – 5.148)    |
| ARDS (N (%))                                                                        | 404 / 4323 (9.3 %)              | 224 / 2223 (10.1 %)<br><sup>A</sup> OR 1.081 (0.909 – 1.286)    | 161 / 1627 (9.9 %)                                             | 52 / 486 (10.7 %)                                              | 11 / 110 (10.0 %)                                          |
| Treatment for septic shock (N (%)) &                                                | 135 / 4175 (3.2 %)              | 94 / 2153 (4.4 %)<br><sup>A</sup> OR 1.326 (1.013 – 1.737)*     | 66 / 1570 (4.2 %)<br><sup>A</sup> OR 1.274 (0.943 – 1.721)     | 25 / 478 (5.2 %)<br><sup>A</sup> OR 1.570 (1.012 – 2.438)*     | 3 / 105 (2.9%)<br><sup>A</sup> OR 0.920 (0.287 – 2.946)    |
| Congestive heart failure (N (%))                                                    | 125 / 4352 (2.9 %)              | 64 / 2235 (2.9 %)<br><sup>A</sup> OR 0.946 (0.696 – 1.287)      | 34 / 1637 (2.1%)                                               | 23 / 488 (4.7 %)                                               | 7 / 110 (6.4 %)                                            |
| Physical decline (N (%))                                                            | 950 / 4126 (23.0 %)             | 576 / 2116 (27.2 %)<br><sup>A</sup> OR 1.221 (1.082 – 1.377)**  | 414 / 1544 (26.8 %)<br><sup>A</sup> OR 1.206 (1.054 – 1.380)** | 136 / 468 (29.1 %)<br><sup>A</sup> OR 1.303 (1.053 – 1.614)*   | 26 / 104 (25.0 %)<br><sup>A</sup> OR 1.059 (0.674 – 1.666) |
| Delirium (N (%))                                                                    | 451 / 4146 (10.5 %)             | 237 / 2136 (11.1 %)<br><sup>A</sup> OR 0.987 (0.833 - 1.170)    | 157 / 1557 (10.1 %)                                            | 62 / 474 (13.1 %)                                              | 18 / 105 (17.1 %)                                          |

1  
2  
3 *ICU = Intensive care unit; ARDS = acute respiratory distress syndrome. OR = odds ratio <sup>A</sup>OR = adjusted odds; odds ratio corrected for sex assigned at birth and age. <sup>#</sup>Uncorrected for sex*  
4 *assigned at birth and age <sup>&</sup> Treatment for septic shock was defined as the need for vasopressors in order to maintain mean arterial blood pressure >65 mmHg and blood lactate level >2*  
5 *mmol/L, in the absence of other causes including hypovolemia. Significance was assessed using a Kruskal wallis test with post-hoc correction (time to discharge alive) or logistic regression (all*  
6 *other values). \* Indicates a p-value <0.05, \*\* indicates a p-value <0.01, \*\*\* indicates a p-value <0.001*  
7  
8  
9  
10  
11  
12  
13  
14  
15  
16  
17  
18  
19  
20  
21  
22  
23  
24  
25  
26  
27  
28  
29  
30  
31  
32  
33  
34  
35  
36  
37  
38  
39  
40  
41  
42  
43  
44  
45  
46

For peer review only

**Supplemental Table 5** – Patient characteristics, signs and symptoms, outcome measures, and complications of patients with hyponatremia ( $\text{Na} \leq 134$  mmol/L) that did not use diuretics stratified based on their urinary sodium excretion.

| 02<br>Patient characteristics                                                                              | Urinary sodium excretion<br>30 mmol/L<br>% or IQR<br>N = 72 | Urinary sodium excretion<br>30<br>mmol/L<br>% or IQR<br>N = 73 | p - value        |
|------------------------------------------------------------------------------------------------------------|-------------------------------------------------------------|----------------------------------------------------------------|------------------|
| Age (median age in years (IQR))                                                                            | N = 72<br>67 (56 – 74)                                      | N = 73<br>69 (59 – 76)                                         | p = 0.47         |
| Sex assigned at birth (N (%))                                                                              | ♂ 38 (53%)<br>♀ 34 (47%)                                    | ♂ 43 (59%)<br>♀ 30 (41%)                                       | p = 0.51         |
| Vomiting/nausea (N (%))                                                                                    | 32 / 71 (45.1 %)                                            | 19 / 67 (28.4 %)                                               | p = 0.05         |
| Diarrhea (N (%))                                                                                           | 26 / 67 (38.8 %)                                            | 28 / 68 (41.2 %)                                               | p = 0.86         |
| Heart rate (mean HR in BPM (SD))                                                                           | N = 71<br>89.7 (± 16.3)                                     | N = 72<br>93.1 (±18.9)                                         | p = 0.20         |
| Systolic blood pressure (mean SBP in mmHg (SD))                                                            | N = 70<br>135 (± 24.8)                                      | N = 71<br>137 (±24.1)                                          | p = 0.87         |
| Disturbed capillary refill (N (%))                                                                         | 3 / 27 (11.1 %)                                             | 4 / 31 (12.9 %)                                                | p = 1.00         |
| eGFR rate using 2021 CKD-epi creatinine equation in (median clearance in ml/min/1.73 m <sup>3</sup> (IQR)) | N = 71<br>67 (49 – 90)                                      | N = 73<br>71 (32 – 92)                                         | p = 0.49         |
| CRP (median level in mmol/L (IQR))                                                                         | N = 70<br>111 (52.5 – 163)                                  | N = 71<br>70 (35.0 – 154)                                      | <b>p = 0.028</b> |
| LDH (median level in U/L (IQR))                                                                            | N = 57<br>351 (270 – 491)                                   | N = 61<br>273 (227 – 434)                                      | <b>p = 0.021</b> |
| CT-severity score (median score (IQR))                                                                     | N = 33<br>11.0 (7.0 – 15.0)                                 | N = 40<br>12.0 (6.0 – 16.8)                                    | p = 0.86         |
| <b>Outcome</b>                                                                                             |                                                             |                                                                |                  |
| Death or palliative discharge (N (%))                                                                      | 14 / 72 (19.4%)                                             | 18 / 73 (24.7 %)                                               | p = 0.55         |
| ICU-admission (N (%), 'do not intubate' excluded)                                                          | 24 / 65 (36.9 %)                                            | 25 / 61 (41.0 %)                                               | p = 0.72         |
| Invasive ventilation (N (%)), 'do not intubate' excluded                                                   | 18 / 64 (28.1 %)                                            | 23 / 60 (38.3 %)                                               | p = 0.26         |

CRP = C-reactive protein; LDH = lactate dehydrogenase; CT = computed tomography; ICU = intensive care unit; eGFR = estimated glomerular filtration rate; CKD-epi = chronic kidney disease Epidemiology Collaboration. Significance was assessed using a Mann-Whitney test (for numerical data) or Chi-square test (for categorical data). p - values for all groups indicate the 2-tailed significance between the two groups.

**STROBE 2007 (v4) Statement—Checklist of items that should be included in reports of *cohort studies***

| Section/Topic                | Item # | Recommendation                                                                                                                                                                       | Reported on page # |
|------------------------------|--------|--------------------------------------------------------------------------------------------------------------------------------------------------------------------------------------|--------------------|
| <b>Title and abstract</b>    | 1      | (a) Indicate the study's design with a commonly used term in the title or the abstract                                                                                               | 1 and 2            |
|                              |        | (b) Provide in the abstract an informative and balanced summary of what was done and what was found                                                                                  | 2                  |
| <b>Introduction</b>          |        |                                                                                                                                                                                      |                    |
| Background/rationale         | 2      | Explain the scientific background and rationale for the investigation being reported                                                                                                 | 4                  |
| Objectives                   | 3      | State specific objectives, including any prespecified hypotheses                                                                                                                     | 5                  |
| <b>Methods</b>               |        |                                                                                                                                                                                      |                    |
| Study design                 | 4      | Present key elements of study design early in the paper                                                                                                                              | 6                  |
| Setting                      | 5      | Describe the setting, locations, and relevant dates, including periods of recruitment, exposure, follow-up, and data collection                                                      | 6                  |
| Participants                 | 6      | (a) Give the eligibility criteria, and the sources and methods of selection of participants. Describe methods of follow-up                                                           | 6                  |
|                              |        | (b) For matched studies, give matching criteria and number of exposed and unexposed                                                                                                  | -                  |
| Variables                    | 7      | Clearly define all outcomes, exposures, predictors, potential confounders, and effect modifiers. Give diagnostic criteria, if applicable                                             | 6 and 7            |
| Data sources/<br>measurement | 8*     | For each variable of interest, give sources of data and details of methods of assessment (measurement). Describe comparability of assessment methods if there is more than one group | 6 and 7            |
| Bias                         | 9      | Describe any efforts to address potential sources of bias                                                                                                                            | 7                  |
| Study size                   | 10     | Explain how the study size was arrived at                                                                                                                                            | 8                  |
| Quantitative variables       | 11     | Explain how quantitative variables were handled in the analyses. If applicable, describe which groupings were chosen and why                                                         | 6 and 7            |
| Statistical methods          | 12     | (a) Describe all statistical methods, including those used to control for confounding                                                                                                | 7                  |
|                              |        | (b) Describe any methods used to examine subgroups and interactions                                                                                                                  | 7                  |
|                              |        | (c) Explain how missing data were addressed                                                                                                                                          | 7                  |
|                              |        | (d) If applicable, explain how loss to follow-up was addressed                                                                                                                       | 7                  |
|                              |        | (e) Describe any sensitivity analyses                                                                                                                                                | -                  |
| <b>Results</b>               |        |                                                                                                                                                                                      |                    |

|                          |     |                                                                                                                                                                                                              |                       |
|--------------------------|-----|--------------------------------------------------------------------------------------------------------------------------------------------------------------------------------------------------------------|-----------------------|
| Participants             | 13* | (a) Report numbers of individuals at each stage of study—eg numbers potentially eligible, examined for eligibility, confirmed eligible, included in the study, completing follow-up, and analysed            | 8                     |
|                          |     | (b) Give reasons for non-participation at each stage                                                                                                                                                         | 8                     |
|                          |     | (c) Consider use of a flow diagram                                                                                                                                                                           | FIG 1                 |
| Descriptive data         | 14* | (a) Give characteristics of study participants (eg demographic, clinical, social) and information on exposures and potential confounders                                                                     | Table 1, p 24         |
|                          |     | (b) Indicate number of participants with missing data for each variable of interest                                                                                                                          | Table 1-4, p 24 to 29 |
|                          |     | (c) Summarise follow-up time (eg, average and total amount)                                                                                                                                                  | -                     |
| Outcome data             | 15* | Report numbers of outcome events or summary measures over time                                                                                                                                               | FIG 2                 |
| Main results             | 16  | (a) Give unadjusted estimates and, if applicable, confounder-adjusted estimates and their precision (eg, 95% confidence interval). Make clear which confounders were adjusted for and why they were included | Table 3, p 27-29      |
|                          |     | (b) Report category boundaries when continuous variables were categorized                                                                                                                                    | 6                     |
|                          |     | (c) If relevant, consider translating estimates of relative risk into absolute risk for a meaningful time period                                                                                             | -                     |
| Other analyses           | 17  | Report other analyses done—eg analyses of subgroups and interactions, and sensitivity analyses                                                                                                               | 8, 9, 11              |
| <b>Discussion</b>        |     |                                                                                                                                                                                                              |                       |
| Key results              | 18  | Summarise key results with reference to study objectives                                                                                                                                                     | 12                    |
| <b>Limitations</b>       |     |                                                                                                                                                                                                              |                       |
| Interpretation           | 20  | Give a cautious overall interpretation of results considering objectives, limitations, multiplicity of analyses, results from similar studies, and other relevant evidence                                   | 12-17                 |
| Generalisability         | 21  | Discuss the generalisability (external validity) of the study results                                                                                                                                        | 16                    |
| <b>Other information</b> |     |                                                                                                                                                                                                              |                       |
| Funding                  | 22  | Give the source of funding and the role of the funders for the present study and, if applicable, for the original study on which the present article is based                                                | 19                    |

\*Give information separately for cases and controls in case-control studies and, if applicable, for exposed and unexposed groups in cohort and cross-sectional studies.

**Note:** An Explanation and Elaboration article discusses each checklist item and gives methodological background and published examples of transparent reporting. The STROBE checklist is best used in conjunction with this article (freely available on the Web sites of PLoS Medicine at <http://www.plosmedicine.org/>, Annals of Internal Medicine at <http://www.annals.org/>, and Epidemiology at <http://www.epidem.com/>). Information on the STROBE Initiative is available at [www.strobe-statement.org](http://www.strobe-statement.org).

# BMJ Open

## What is the etiology of dysnatremia in COVID-19 and how is this related to outcomes in patients admitted during earlier and later COVID-19 waves? A multicentre, retrospective observational study

|                                 |                                                                                                                                                                                                                                                                                                                                                                                                                                                                                                                                                                                                                                                                                                                                                                                                                                                                                                                                                                                                                                                                                                                                                                                                                                                                                                                                                                                                                                                                                                                                                             |
|---------------------------------|-------------------------------------------------------------------------------------------------------------------------------------------------------------------------------------------------------------------------------------------------------------------------------------------------------------------------------------------------------------------------------------------------------------------------------------------------------------------------------------------------------------------------------------------------------------------------------------------------------------------------------------------------------------------------------------------------------------------------------------------------------------------------------------------------------------------------------------------------------------------------------------------------------------------------------------------------------------------------------------------------------------------------------------------------------------------------------------------------------------------------------------------------------------------------------------------------------------------------------------------------------------------------------------------------------------------------------------------------------------------------------------------------------------------------------------------------------------------------------------------------------------------------------------------------------------|
| Journal:                        | <i>BMJ Open</i>                                                                                                                                                                                                                                                                                                                                                                                                                                                                                                                                                                                                                                                                                                                                                                                                                                                                                                                                                                                                                                                                                                                                                                                                                                                                                                                                                                                                                                                                                                                                             |
| Manuscript ID                   | bmjopen-2023-075232.R1                                                                                                                                                                                                                                                                                                                                                                                                                                                                                                                                                                                                                                                                                                                                                                                                                                                                                                                                                                                                                                                                                                                                                                                                                                                                                                                                                                                                                                                                                                                                      |
| Article Type:                   | Original research                                                                                                                                                                                                                                                                                                                                                                                                                                                                                                                                                                                                                                                                                                                                                                                                                                                                                                                                                                                                                                                                                                                                                                                                                                                                                                                                                                                                                                                                                                                                           |
| Date Submitted by the Author:   | 18-Jul-2023                                                                                                                                                                                                                                                                                                                                                                                                                                                                                                                                                                                                                                                                                                                                                                                                                                                                                                                                                                                                                                                                                                                                                                                                                                                                                                                                                                                                                                                                                                                                                 |
| Complete List of Authors:       | de Haan, Lianne; Flevo Hospital, Department of Internal Medicine; Medical Centre Alkmaar, Department of Internal Medicine<br>ten Wolde, Marije; Flevo Hospital, Department of Internal Medicine<br>Beudel, Martijn; Amsterdam University Medical Centers, Neurology<br>Olde Engberink, Rik H G ; Amsterdam University Medical Centres, Center of Experimental and Molecular Medicine<br>Appelman, Brent; Amsterdam UMC location University of Amsterdam, Center for Experimental and Molecular Medicine<br>Haspels-Hogervorst, Esther; Martini Hospital, Department of intensive care<br>Rusch, Daisy; Martini Ziekenhuis, Department of intensive care<br>Gritters van den Oever, Niels; Treant Zorggroep, Department of Intensive Care<br>Simsek, Suat; Noordwest Ziekenhuisgroep, Department of Internal Medicine<br>Paternotte, Nienke; Northwest Hospital Group, Pulmonology<br>van den Bergh, Joop; VieCuri Medical Centre, Department of Internal Medicine<br>Wyers, Caroline; VieCuri Medical Centre, Department of Internal Medicine<br>de Kruif, Martijn; Zuyderland Medical Centre Heerlen, Department of Pulmonary Medicine<br>Dormans, Tom; Zuyderland Medical Centre, Department of Intensive Care<br>Moeniralam, Hazra; Sint Antonius Hospital, Department of Internal Medicine<br>Bokhizzou, Neyma; Bovenij Hospital, Internal Medicine<br>Brinkman, Kees; OLVG, Dept of Internal Medicine<br>Douma, Renee; Flevo Hospital, Department of Internal Medicine<br>Collaborator, COVIDPredict Study Group; Amsterdam University Medical Centres |
| <b>Primary Subject Heading</b>: | Infectious diseases                                                                                                                                                                                                                                                                                                                                                                                                                                                                                                                                                                                                                                                                                                                                                                                                                                                                                                                                                                                                                                                                                                                                                                                                                                                                                                                                                                                                                                                                                                                                         |
| Secondary Subject Heading:      | Renal medicine, Respiratory medicine                                                                                                                                                                                                                                                                                                                                                                                                                                                                                                                                                                                                                                                                                                                                                                                                                                                                                                                                                                                                                                                                                                                                                                                                                                                                                                                                                                                                                                                                                                                        |
| Keywords:                       | INTERNAL MEDICINE, COVID-19, INFECTIOUS DISEASES                                                                                                                                                                                                                                                                                                                                                                                                                                                                                                                                                                                                                                                                                                                                                                                                                                                                                                                                                                                                                                                                                                                                                                                                                                                                                                                                                                                                                                                                                                            |

1  
2  
3  
4  
5  
6  
7  
8  
9  
10  
11  
12  
13  
14  
15  
16  
17  
18  
19  
20  
21  
22  
23  
24  
25  
26  
27  
28  
29  
30  
31  
32  
33  
34  
35  
36  
37  
38  
39  
40  
41  
42  
43  
44  
45  
46  
47  
48  
49  
50  
51  
52  
53  
54  
55  
56  
57  
58  
59  
60

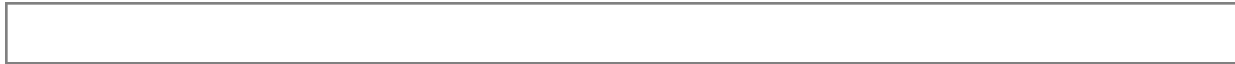

SCHOLARONE™  
Manuscripts



I, the Submitting Author has the right to grant and does grant on behalf of all authors of the Work (as defined in the below author licence), an exclusive licence and/or a non-exclusive licence for contributions from authors who are: i) UK Crown employees; ii) where BMJ has agreed a CC-BY licence shall apply, and/or iii) in accordance with the terms applicable for US Federal Government officers or employees acting as part of their official duties; on a worldwide, perpetual, irrevocable, royalty-free basis to BMJ Publishing Group Ltd ("BMJ") its licensees and where the relevant Journal is co-owned by BMJ to the co-owners of the Journal, to publish the Work in this journal and any other BMJ products and to exploit all rights, as set out in our [licence](#).

The Submitting Author accepts and understands that any supply made under these terms is made by BMJ to the Submitting Author unless you are acting as an employee on behalf of your employer or a postgraduate student of an affiliated institution which is paying any applicable article publishing charge ("APC") for Open Access articles. Where the Submitting Author wishes to make the Work available on an Open Access basis (and intends to pay the relevant APC), the terms of reuse of such Open Access shall be governed by a Creative Commons licence – details of these licences and which [Creative Commons](#) licence will apply to this Work are set out in our licence referred to above.

Other than as permitted in any relevant BMJ Author's Self Archiving Policies, I confirm this Work has not been accepted for publication elsewhere, is not being considered for publication elsewhere and does not duplicate material already published. I confirm all authors consent to publication of this Work and authorise the granting of this licence.



1  
2  
3  
4  
5  
6  
7  
8  
9  
10  
11  
12  
13  
14  
15  
16  
17  
18  
19  
20  
21  
22  
23  
24  
25  
26  
27  
28  
29  
30  
31  
32  
33  
34  
35  
36  
37  
38  
39  
40  
41  
42  
43  
44  
45  
46  
47  
48  
49  
50  
51  
52  
53  
54  
55  
56  
57  
58  
59  
60

# What is the etiology of dysnatremia in COVID-19 and how is this related to outcomes in patients admitted during earlier and later COVID-19 waves? A multicentre, retrospective observational study

L.R. de Haan<sup>a, f1, \*</sup>, M. ten Wolde<sup>a1</sup>, M. Beudel<sup>b</sup>, R.H. Olde Engberink<sup>c1</sup>, B. Appelman<sup>c2</sup>, E.K. Haspels-Hogervorst<sup>d1</sup>, D. Rusch<sup>d2</sup>, N.C. Gritters-van den Oever<sup>e</sup>, S. Simsek<sup>f1</sup>, N. Paternotte<sup>f2</sup>, J.P. van den Bergh<sup>g1</sup>, C.E. Wyers<sup>g2</sup>, M. de Kruif<sup>h1</sup>, T. Dormans<sup>h2</sup>, H. Moeniralam<sup>i</sup>, N. Bokhizzou<sup>j</sup>, K. Brinkman<sup>k</sup>, R.A. Douma<sup>a2</sup>, on behalf on The Dutch COVID-PREDICT study group

<sup>a</sup> Department of Internal Medicine, Flevo Hospital, Almere, the Netherlands

<sup>b</sup> Department of Neurology, Amsterdam University Medical Centre

<sup>c</sup> Center of Experimental and Molecular Medicine (C.E.M.M.), Location Academic Medical Center, Amsterdam UMC, Amsterdam, The Netherlands

<sup>d</sup> Department of Intensive Care, Martini Hospital, Groningen, the Netherlands

<sup>e</sup> Department of Intensive Care, Treant Hospitals, Hoogeveen, Emmen, and Stadskanaal, the Netherlands

<sup>f1</sup> Department of Internal Medicine, Northwest Clinics, Alkmaar, the Netherlands

<sup>f2</sup> Department of Pulmonary diseases, Northwest Clinics, Alkmaar, the Netherlands

<sup>g</sup> Department of Internal Medicine, VieCuri Medical Centre, Venlo, the Netherlands

<sup>h1</sup> Department of Pulmonary diseases, Zuyderland Medical Centre, Heerlen, the Netherlands

<sup>h2</sup> Department of Intensive Care, Zuyderland Medical Centre, Heerlen, the Netherlands

<sup>i</sup> Department of Internal Medicine, St. Antonius Hospital, Nieuwegein, the Netherlands

Department of Internal Medicine, BovenIJ hospital, Amsterdam, the Netherlands

<sup>k</sup> Department of Internal Medicine, Onze Lieve Vrouwe Gasthuis, Amsterdam, the Netherlands

\* **Corresponding author:** Lianne R. de Haan, Department of Internal Medicine, Flevoziekenhuis, Hospitaalweg 1, 1315 RA Almere, The Netherlands, E: [lr.de.haan@nwz.nl](mailto:lr.de.haan@nwz.nl), T +316-53853254. Present address: Department of Internal Medicine, Northwest Clinics, Wilhelminalaan 12, 1815 JD Alkmaar, The Netherlands.

## **Abstract**

### **Objectives**

To evaluate the relation between dysnatremia at hospital presentation and duration of admission, risk of ICU-admission, and all-cause mortality and to assess the underlying pathophysiological mechanism of hyponatremia in COVID-19 patients. Our hypothesis is that both hypo- and hypernatremia at presentation are associated with adverse outcomes.

### **Design**

Observational study

### **Setting**

Secondary care; nine Dutch hospitals (2 university and 9 general hospitals)

### **Participants**

An analysis was performed within the retrospective multicenter cohort study COVIDPredict. 7811 patients were included (60% males, 40% females) between February 24<sup>th</sup> 2020 and August 19<sup>th</sup> 2022. Patients who were  $\geq 18$  years with PCR-confirmed COVID-19, or CT with COVID-19 reporting and data system score  $\geq 4$  and alternative diagnosis were included. Patients were excluded when serum sodium levels at presentation were not registered in the database or when they had been transferred from another participating hospital.

### **Outcome measures**

We studied demographics, medical history, symptoms, and outcomes. Patients were stratified according to serum sodium concentration and urinary sodium excretion.

### **Results**

Hyponatremia was present in 2677 (34.2%) and hypernatremia in 126 (1.6%) patients. Patients with hyponatremia presented more frequently with diarrhea, lower blood pressure, and tachycardia. Hyponatremia was, despite a higher risk for ICU admission (OR 1.27 (1.11-1.46;  $p < 0.001$ ), not associated with mortality or the risk for intubation. Patients with hypernatremia had higher mortality rates

1  
2  
3 (OR 2.25 1.49 – 3.41;  $p < 0.001$ ) and were at risk for ICU-admission (OR 2.89 (1.83 – 4.58) and intubation  
4  
5 (OR 2.95 (1.83 – 4.74)).  
6  
7

### 8 **Conclusions**

9  
10 Hypernatremia at presentation was associated with adverse outcomes in COVID-19 patients.  
11  
12 Hypovolemic hyponatremia was found to be the most common etiology of hyponatremia. Hyponatremia  
13  
14 of unknown etiology was associated with a higher risk for ICU admission and intubation and longer  
15  
16 duration of admission.  
17

### 18 **Strengths and limitations of this study**

- 19  
20  
21  
22  
23 - This study includes over 7000 patients from different COVID-19 waves and from multiple  
24  
25 hospitals, resulting in an heterogenous patient population;  
26  
27 - This study relates the different presumed etiologies to clinical outcomes;  
28  
29 - A relative low number of urinary samples was available for patients with hyponatremia;  
30  
31 - Different treatment options that became available for COVID-19 during the ongoing pandemic  
32  
33 were not taken into account in thus study, which may have influenced the outcome of patients.  
34  
35  
36  
37  
38  
39  
40  
41  
42  
43  
44  
45  
46  
47  
48  
49  
50  
51  
52  
53  
54  
55  
56  
57  
58  
59  
60

## 1. Introduction

The coronavirus known as severe acute respiratory syndrome coronavirus 2 (SARS-CoV-2) has caused a global pandemic since February 2020. By the time of October 19<sup>th</sup>, 2022, there had been over 621 million reported cases and 2.9 million deaths attributed to coronavirus disease 19 (COVID-19), which is caused by SARS-COV-2-infection. Respiratory failure resulting from acute respiratory distress syndrome is the leading cause of death associated with SARS-CoV-2 infection<sup>3 20 21</sup>.

Common signs and symptoms of COVID-19 infection vary widely, but fever, cough, and dyspnea are frequently present. Other less frequent symptoms include anosmia, nausea, vomiting, diarrhea, and general illness<sup>3</sup>. In addition to these clinical symptoms, certain laboratory markers can indicate COVID-19. Elevated lactate dehydrogenase (LDH) levels and lymphopenia are commonly observed<sup>18 22</sup>. Furthermore, electrolyte imbalances such as hypocalcemia, hypokalemia, and dysnatremia (hypo- or hypernatremia) are often present in COVID-19 patients upon hospital admission<sup>15 18</sup>. Hyponatremia, in particular, has been reported in 7% to 64% of COVID-19 cases<sup>2 6 23-25</sup>, compared to 20-30% in all hospitalized patients<sup>26</sup>. It has been demonstrated that critically ill patients with COVID-19 more frequently develop hyponatremia during the first 72 hours of admission<sup>7</sup>. Hyponatremia is also frequently present in other infectious diseases, such as pneumonia, tuberculosis, meningitis, human immunodeficiency virus (HIV) infection, malaria, and leishmaniasis and has been linked to negative outcomes in these diseases and in COVID-19<sup>2 4 19 23 25 27 28</sup>. On the other hand, hypernatremia is less common, occurring in less than 10% of the general population and in up to 38% of patients in intensive care units. Hypernatremia is also associated with adverse clinical outcomes<sup>1 6 12 13 19</sup>.

The etiology of hyponatremia in infectious diseases, including COVID-19, can broadly be categorized into two groups based on urinary sodium excretion (USE). Low USE (<30 mmol/l) indicates an activation of the renin-angiotensin system (RAAS), e.g. due to hypovolemia resulting from inadequate dietary intake, vomiting or diarrhea. Conversely, high USE suggests RAAS inactivation, which could occur in patients with syndrome of inappropriate antidiuretic hormone secretion (SIADH) and in patients with critical illness-related corticoid deficiency, although diuretic usage can affect diagnostic accuracy<sup>16 29</sup>. In other infectious diseases, antidiuretic hormone (ADH) release has been linked to secretion of inflammatory marker interleukin-6<sup>30</sup>. Interleukin-6 is also enhanced in COVID-19 patients and is targeted

1  
2  
3 by off-label administration of interleukin-6-inhibitors, like tocilizumab and sarilumab<sup>21 31</sup>. Both etiologies  
4 (hypovolemic hyponatremia and inadequate ADH secretion) have been proposed to contribute to  
5 hyponatremia in COVID-19, although the exact mechanism is still unclear. Hyponatremia primarily  
6 occurs due to insufficient water intake, often caused by hypothalamic thirst center dysfunction or limited  
7 access to fluid intake. It can also result from diabetes insipidus, a condition characterized by ADH  
8 deficiency or resistance<sup>32</sup>.

9  
10  
11  
12  
13  
14  
15  
16  
17  
18  
19  
20  
21  
22  
23  
24  
25  
26  
27  
28  
29  
30  
31  
32  
33  
34  
35  
36  
37  
38  
39  
40  
41  
42  
43  
44  
45  
46  
47  
48  
49  
50  
51  
52  
53  
54  
55  
56  
57  
58  
59  
60

Previous studies have associated both hyponatremia and hypernatremia with worse clinical outcomes in COVID-19 patients during the early stages of the pandemic<sup>1 2 4 23 25 28</sup>. However, most of these studies were conducted before interleukin-6 inhibitors were administered and before the registration of Sars-CoV-2 vaccines<sup>1 21 23 25 33-36</sup>. Additionally, they lacked data on clinical parameters at presentation and how they differed between patients with or without dysnatremia, making it difficult to determine the underlying cause of the hyponatremia and to relate this cause to clinical outcomes<sup>19 34 37-39</sup>.

This study reports the incidence rates of hypo- and hypernatremia upon admission in COVID-19 patients from a large multi-center cohort study in The Netherlands, encompassing multiple COVID-19 waves. We hypothesize that both hyponatremia and hypernatremia can predict adverse outcomes, including ICU admission, the need for invasive ventilation, and mortality rates among hospitalized COVID-19 patients. Furthermore, we seek to investigate potential pathophysiological mechanisms underlying these conditions based on clinical features and laboratory values at presentation.

## 2. Methods

### 2.1 Patient recruitment and public involvement

We utilized data from the ongoing retrospective multicenter COVIDPredict Clinical Course Cohort, containing over 6500 patients with COVID-19, recruited between February 24<sup>th</sup>, 2020, and August 9<sup>th</sup>, 2022, in nine Dutch hospitals (two university and nine general hospitals). Inclusion criteria for the database required patients to be 18 years or older and either had a positive polymerase chain reaction (PCR) test for SARS-CoV-2 or had a COVID-19 reporting data system (CO-RADS) score of 4 (indicating abnormalities suspicious for COVID-19) or 5 (indicating typical COVID-19) on thoracic computed tomography (CT)-scan in the absence of an alternative diagnosis<sup>40</sup>. A waiver for the use of hospital data was obtained from the Medical Ethical Committees of the participating centers (Amsterdam UMC; 20.131) to utilize the hospital data. Patients were given the opportunity to opt out. To avoid duplicate entries, patients transferred from one participating hospital to another were excluded, resulting in a total 297 exclusions.

### 2.2 Study design

The included patients were categorized into three groups based on their serum sodium concentration upon admission to the participating hospital. The serum sodium concentration was adjusted for serum glucose concentration, whenever available, following the method described by Hillier, et al. <sup>41</sup>. The sodium concentrations were stratified as follows: 'normonatremia' (corrected serum sodium concentration (Na) 135-145 mmol/L), hyponatremia (corrected serum sodium concentration (Na) <135 mmol/L), further subcategorized as 'mild' (corrected serum sodium concentration Na 131-134 mmol/L), 'moderate' (corrected serum sodium concentration Na 126-130 mmol/L), and 'severe' (corrected serum sodium concentration Na  $\leq$  125 mmol/L) (Supplemental information). 'Hypernatremia' referred to corrected serum sodium concentration Na  $\geq$  146 mmol/L. Throughout the text, serum sodium concentrations and sodium groups refer to the corrected sodium values unless otherwise specified.

Demographic information such as ethnicity, sex at birth, and age, as well as co-morbidities categorized according to predetermined groups (additional information in the Supplemental Information), home medication, and presenting signs and symptoms were compared between the

1  
2  
3 groups and between normonatremia and different severity categories of hyponatremia (Supplemental  
4 information). Serum concentrations of creatinine, urea, C-reactive protein (CRP), and LDH were  
5 measured at the time of first presentation in the participating hospital. The estimated glomerular filtration  
6 rate (eGFR) was calculated using the 2021 Chronic kidney disease Epidemiology Collaboration (CKD-  
7 epi) formula based on serum creatinine levels<sup>42</sup>. The Modified Early Warning Score (MEWS) and Quick  
8 Sequential Organ Failure Assessment (qSOFA) were calculated based in clinical values obtained at  
9 presentation.  
10  
11  
12  
13  
14  
15

16 The following clinical outcome measures were compared between the groups and across  
17 different severity categories: duration of hospitalization, admission to intensive care unit, invasive  
18 ventilation, duration of ICU admission, discharge alive, death, and the administration of tocilizumab,  
19 sarilumab, or anakinra. Additionally, the incidence of complications was compared between the groups.  
20  
21  
22  
23  
24  
25

### 26 **2.3 Statistical analysis**

27  
28  
29

30 All data were analyzed using SPSS version 27. Comparisons were conducted between hyper-, normo-  
31 , and hyponatremia (Main Text) and between the normonatremia, mild, moderate, and severe  
32 hyponatremia groups (Supplemental Information). Baseline numerical data were presented as median  
33 and interquartile range, and the Kruskal Wallis test was used for analysis when the data were not  
34 normally distributed. For normally distributed data, baseline numerical data were presented as mean  
35 and standard deviation, and one-way ANOVA was employed for analysis. Baseline categorical data  
36 were displayed as absolute number and percentage of patients with the specific condition, and the Chi-  
37 square test was used for analysis.  
38  
39  
40  
41  
42  
43  
44

45 Outcome data (risk for ICU-admission, intubation, mortality rates, use of tocilizumab, sarilumab, or  
46 anakinra, and complications) were assessed using a binary logistic regression model. The odds ratios  
47 were calculated and adjusted for age, sex assigned at birth (categorized as male or female based on  
48 genotype and internal and external anatomy at birth), a history of chronic kidney disease, and a history  
49 of hypertension. The duration of hospital and ICU admission were evaluated using a Kruskal Wallis test.  
50  
51  
52  
53  
54  
55  
56  
57  
58  
59  
60

1  
2  
3 discharged alive for patients with and without dysnatremia. The hazard ratios were adjusted for age,  
4 sex assigned at birth, a history of chronic kidney disease, and a history of hypertension.  
5

6  
7 A p-value of  $\leq 0.05$  was considered statistically significant for all statistical tests. Patients who did  
8 not have data available for the specific variable being tested were excluded from the corresponding  
9 analysis.  
10  
11

## 12 13 14 **2.4 Patients and public involvement**

15  
16 This study was largely conducted during the first waves of the COVID-19 pandemic. As a result, it was  
17 not feasible to directly involve patients in the design of the study. Patients received information about  
18 the CovidPredict database via pamphlets and verbal communication. Additionally, information was  
19 available on the websites of participating hospitals and through various media channels. Details  
20 regarding the study design and dissemination plans are available on our website [www.covidpredict.org](http://www.covidpredict.org).  
21  
22  
23  
24  
25  
26  
27  
28  
29  
30  
31  
32  
33  
34  
35  
36  
37  
38  
39  
40  
41  
42  
43  
44  
45  
46  
47  
48  
49  
50  
51  
52  
53  
54  
55  
56  
57  
58  
59  
60



### 3. Results

#### 3.1 Incidence of dysnatremia at presentation

At the time of August 9<sup>th</sup>, 2022, the database contained a total of 11.382 records. Serum sodium concentrations at admission were available for 8278 (73%) admissions from 7811 patients (170 duplicate entries due to readmission and 297 patients had been transferred from or previously admitted to another participating hospital and transfer records were therefore excluded). Patients were included based on two criteria: a positive result for SARS-CoV-2 PCR (6673 patients) and or a CO-RADS score 4 or 5 in the absence of an alternative diagnosis (1138 patients). In cases where patients were readmitted, the admission with the abnormal sodium level at presentation (in case of hyponatremia or hypernatremia) or the first admission (in case sodium concentrations were normal for both presentations) was included in the analysis.

Of the 7811 included patients with COVID-19, 2677 (34.3%) presented with hyponatremia (corrected blood serum Na <135 mmol/L), and 126 (1.6%) presented with hypernatremia (corrected blood serum Na  $\geq$  146 mmol/L). Among the patients presenting with hyponatremia, 1957 (25.1%) presented with blood serum Na ranging 131-134 mmol/L (considered 'mild'), 582 (7.5%) presented with blood serum Na ranging 126-130 mmol/L (considered 'moderate'), and 138 (1.8%) with blood serum Na  $\leq$  125 mmol/L (considered 'severe') (see Supplemental Figure 1). A total of 1888 patients were included after the start of the SARS-CoV-19 vaccination campaign in the Netherlands on January 6<sup>th</sup>, 2021, of whom 445 were vaccinated (319 had received two or more doses). A total of 6183 patients (79.2%) started having symptoms prior to the seventh week of 2021, when the initial SARS-CoV-2 variants were most prevalent. 747 patients (9.6%) developed symptoms from the seventh to twenty-fifth week of 2021, when alpha-variants dominated in the Netherlands. 686 patients (8.8%) started having symptoms when delta variants dominated (twenty-sixth to fifty-first week of 2021), and 118 patients (1.5%) when the omicron variants dominated (after the fifty-second week of 2021)<sup>17</sup>.

### 3.2 Patient characteristics of patients presenting with dysnatremia

Table 1 shows the characteristics of patients with hyponatremia and hypernatremia compared to patients presenting with normal sodium concentrations at presentation. Both hypo- and hypernatremia occurred more often in males than in females (Table 1), except for 'severe' hyponatremia (Supplemental Table 1). The mean age of patients with and without hyponatremia differed slightly, with patients presenting with 'moderate' or 'severe' hyponatremia being significantly older (median age 68.1 and 70.6 years, respectively). Patients with hypernatremia were also older, with a mean age of 72.5 years. The body mass index (BMI) of patients presenting with hyponatremia tended to be slightly lower compared to those with normal sodium levels and was also lower in patients presenting with hypernatremia. Abnormal sodium levels at presentation were associated with chronic kidney disease. Patients with hyponatremia, particularly those with severe hyponatremia, more frequently had a history of hypertension, but this difference was not statistically significant for the subgroup of patients who did not use diuretics (36.4% (normonatremia) vs. 39.1% (hyponatremia);  $p = 0.003$ ; determined by a Chi-square test). The presence of hypo- or hypernatremia was not associated with a history of chronic heart, pulmonary, or liver disease (refer to Supplemental Table 2 for definitions). Regarding medication use, the use of thiazide diuretics was higher in patients with hyponatremia (Table 1), but the overall use of diuretics or the use of loop diuretics did not differ between the groups. Similarly, the use of selective serotonin (and noradrenalin) reuptake inhibitors (SSRIs/SNRIs) did not show significant differences between the groups. The use of immunosuppressives was more common in patients presenting with hyponatremia as compared to those with normal sodium concentration at presentation.

### 3.3 Signs and symptoms of patients presenting with dysnatremia

Patients with hyponatremia more frequently presented with diarrhea and anosmia compared to patients without hyponatremia (Table 2 and Supplemental Table 3). The presence of vomiting or nausea as presenting symptoms was not associated with hyponatremia. In the hypernatremia group, confusion was more frequently observed compared to patients with normal sodium levels. A prolonged capillary refill time of  $\geq 3$ s, which may indicate dehydration, was more often present in the hypernatremia group.

1  
2  
3 Patients with hypernatremia also had a slightly higher heart rate. Hyponatremia was associated with a  
4 slightly higher heart rate and a slightly lower systolic blood pressure, although these differences were  
5 not clinically significant. Both patients with hypernatremia and hyponatremia had a lower eGFR, with a  
6 more pronounced effect observed in the hypernatremia group (Table 2). A lower eGFR was associated  
7 with slightly higher mortality rates (unadjusted HR 1.008, 95% CI 1.007 – 1.008);  $p = 0.001$ , analyzed  
8 using a Cox proportional hazard regression analysis), regardless of sodium levels at presentation or  
9 exclusion of patients with chronic kidney disease. Enhanced blood urea concentration was only  
10 associated with hypernatremia.  
11  
12  
13  
14  
15  
16  
17

18 Patients with hyponatremia had higher blood CRP and LDH concentrations compared to those  
19 with normal sodium levels (Table 2). However, the fraction of supplemented oxygen (FiO<sub>2</sub>) and CT-  
20 severity scores did not differ significantly between the groups. The clinical score systems MEWS and  
21 qSOFA<sup>43</sup> (Table 2) also showed significant differences between the groups, but these differences were  
22 not clinically relevant.  
23  
24  
25  
26  
27

28 Furthermore, patients with hyponatremia had a slightly longer duration of complaints compared  
29 to those with normonatremia (8.8 days for hyponatremia vs. 8.6 days for;  $p = 0.010$ ; assessed using a  
30 Kruskal-Wallis test), although this difference was not clinically relevant.  
31  
32  
33  
34  
35

### 36 **3.4 Clinical outcomes in patients presenting with dysnatremia**

37  
38

39 Hypernatremia was associated with higher mortality rates or palliative discharge rates compared to the  
40 normo- and hyponatremia groups (Table 3, Figure 1, and Supplemental Figure 2). Additionally, patients  
41 with hypernatremia had a higher risk of ICU-admission and invasive ventilation. However, hyponatremia  
42 was not associated with increased mortality or palliative discharge rates (Table 3). Although there was  
43 a trend towards increased mortality in patients with severe hyponatremia, these results did not reach  
44 statistical significance due to the low number of patients that presented with sodium levels  $\leq 125$   
45 mmol/L (Supplemental Table 4). After excluding patients with a 'do not intubate' order hyponatremia  
46 was associated with a higher likelihood of ICU-admission, but not with the need for invasive ventilation.  
47 The duration of ICU admission was similar for patients with hypo-, normo-, and hypernatremia (Table  
48 3). Based on the additional details provided in Supplemental Table 5, patients with the order 'do not  
49 intubate' are considered frailer and thus had limited live expectancy.  
50  
51  
52  
53  
54  
55  
56  
57  
58  
59  
60

1  
2  
3 Hyponatremia corrected for glucose was used for all statistical testing. However, as some other  
4 studies used uncorrected hyponatremia<sup>37 44</sup>, we also examined the association of uncorrected  
5 hyponatremia with different outcomes. Without correction for serum glucose concentration,  
6  
7 hyponatremia was still associated with a slightly higher rate of ICU admission (adjusted odds ratio (AOR)  
8  
9 1.40 (1.23 – 1.60);  $p < 0.001$ ) and with the need for intubation (AOR 1.26 (1.10 – 1.46);  $p = 0.001$ ), but  
10  
11 not with death or palliative discharge rates (AOR 1.11 (0.97 – 1.28);  $p = 0.13$ ).  
12  
13

14  
15 Despite the correlation with ICU admission in patients with hyponatremia, the duration of  
16  
17 admission was not significantly longer in this group. Similar outcomes were observed for patients with  
18  
19 confirmed COVID-19 (SARS-CoV-2 PCR positive; 6673 patients) only, although in this subgroup, the  
20  
21 higher risk for ICU admission for patients with hyponatremia no longer reached statistical significance.

22  
23 As the COVID-19 pandemic progressed, the incidence of adverse outcomes was significantly  
24  
25 lower in patients with normo-, and hyponatremia at presentation that were admitted after September  
26  
27 20<sup>th</sup> 2020 (2<sup>nd</sup> to 4<sup>th</sup> quartile) as compared to those admitted before September 20<sup>th</sup>, 2020 (1<sup>st</sup> quartile;  
28  
29 Figure 2). However, hypernatremia was associated with a higher risk for ICU admission and invasive  
30  
31 ventilation for patients admitted after 26-01-2022 (4<sup>th</sup> quartile; compared to patients admitted in the 1<sup>st</sup>  
32  
33 quartile). The use of tocilizumab, sarilumab (interleukin-6 receptor agonists) and anakinra (interleukin-  
34  
35 1 receptor agonist) did not differ between the groups. Administration of COVID-19 vaccination was not  
36  
37 reported frequently enough to draw conclusions about its possible effects on outcome measures.  
38  
39

### 40 **3.5 Complications associated with hyponatremia upon admission**

41  
42  
43  
44 After adjusting for sex assigned at birth, age, and a history of chronic kidney disease and hypertension,  
45  
46 the course of disease of patients with hyponatremia was more often complicated by an aspergillosis  
47  
48 pneumonia (almost exclusively in patients that needed invasive ventilation and more frequently in  
49  
50 patients treated with dexamethasone, antibiotics, tocilizumab, sarilumab, or anakinra) and physical  
51  
52 decline (the latter was scored when explicitly documented in the patients' medical records, when the  
53  
54 patient suffered from 'ICU-acquired weakness', or when the patient was referred for medical  
55  
56 rehabilitation).

57  
58 Patients with hypernatremia, on the other hand, were more likely to experience acute respiratory  
59  
60 distress syndrome and receive treatment for septic shock (defined as the need for vasopressors in order

1  
2  
3 to maintain mean arterial blood pressure >65 mmHg and blood lactate level >2 mmol/L, in the absence  
4 of other causes including hypovolemia). They also had a higher incidence of delirium. It should be noted  
5 that excessive fluid resuscitation for the management of hypo- or hypernatremia could potentially lead  
6 to congestive heart failure, but the occurrence of this complication was rare and did not occur more  
7 frequently in patients with abnormal sodium values at presentation.  
8  
9  
10  
11  
12  
13  
14  
15

### 16 **3.6 Urinary sodium excretion related to patients' characteristics and outcomes**

17  
18  
19

20 USE was measured in 185 (6.9%) patients with hyponatremia of whom 145 (78%) did not use  
21 diuretics. Among these patients were 48 with 'mild', 67 with 'moderate', and 30 with 'severe'  
22 hyponatremia. The range of USE was 5.0 to 239 mmol/L, with a median of 30.0 mmol/L. Urinary  
23 osmolarity (UOL) was measured in 81 (3.0%) patients who did not use diuretics, including 26 with 'mild',  
24 37 with 'moderate', and 18 with 'severe' hyponatremia. The range of UOL values was 8 - 1007  
25 mOsmol/kg, with a median of 496 mOsmol/kg. Among patients in whom both USE and UOL were  
26 measured, 12 patients (15% of the total) met the definition of SIADH (USE  $\geq$  30 mmol/L and UOL  $\geq$   
27 100 mOsmol/kg in the absence of diuretic use and signs of hypovolemia (systolic blood pressure < 90  
28 mmHg or heart rate  $\geq$  100 BPM)).  
29  
30  
31  
32  
33  
34  
35  
36  
37

38 Patients were divided in two groups based on USE. Out of urinary sodium measurements, 72  
39 patients (49.7%) had low USE (< 30 mmol/L), indicating activation of the RAAS, while 73 patients  
40 (50.3%) had high USE ( $\geq$  30 mmol/L), indicating activation of the RAAS (Supplemental Table 6). A low  
41 USE was associated with a higher levels of CRP (111 (52.5 – 163) mmol/L vs. 70 (35.0 – 154) mmol/L;  
42  $p = 0.028$ ) and LDH (351 (270 – 491) U/L vs. 273 (227- 434) U/L;  $p = 0.021$ ) at presentation  
43 (Supplemental Table 6), but was not associated with symptoms such as nausea / vomiting or clinical  
44 signs of hypovolemia, such as tachycardia or hypotension. There were no significant differences in  
45 outcome measures, such as duration of admission, ICU admission, or death/palliative discharge,  
46 between patients with a low and high USE.  
47  
48  
49  
50  
51  
52  
53  
54  
55  
56  
57  
58  
59  
60

### 3.7 Etiology related to outcomes

Among the patients who presented with hyponatremia, 983 patients (36.7%) reported a history of gastrointestinal symptoms, such as nausea, vomiting, or diarrhea, and did not use diuretics or met the criteria for SIADH. 271 patients (10.1%) used diuretics in the absence of gastrointestinal symptoms and 12 (0.5%) who did not use diuretics complied to the definition of SIADH, of whom 5 also had gastrointestinal symptoms. Another group of 201 patients (7.5) had a history of nausea, vomiting, or diarrhea and used diuretics. However, the largest portion of patients (1210 patients, 45.2%) had an unknown etiology for hyponatremia, as they did not have a history of gastrointestinal symptoms, did not use diuretics, and did not meet the criteria for SIADH.

Figure 1D illustrates a cox proportional hazard curve, with separate lines representing each proposed etiology. It was observed that patients with a history of gastrointestinal symptoms had lower mortality rates compared to those with normal sodium levels (unadjusted hazard ratio (HR) 0.739, 95% confidence interval (CI) 0.611 – 0.894;  $p = 0.002$ ), despite higher CRP (mean 95 mg/L, IQR 47.5 – 151 mg/L) and LDH levels (mean 350 U/L, IQR 271 – 470 U/L) compared to normonatremia ( $p < 0.001$ ; assessed using a Kruskal-Wallis test). Patients with hyponatremia of unknown etiology had a higher risk of ICU admission (unadjusted OR 1.299, 95% CI 1.091 – 1.549;  $p = 0.003$ ; linear regression) and were at risk for intubation (unadjusted OR 1.313, 95% CI 1.109 – 1.554;  $p = 0.002$ ; linear regression), which was in line with higher CRP levels (mean 98 mg/L, IQR 53 – 166 mg/L) and LDH levels (mean 353 U/L, IQR 270 – 479 U/L) in this group compared to normonatremia ( $p < 0.001$ ; assessed using a Kruskal-Wallis test). However, the duration of ICU admission did not differ significantly among the different groups. It was found that patients with hyponatremia of unknown etiology had a slightly longer duration of hospital admission (8 days, interquartile range 4 – 17 days) compared to other groups ( $p = 0.005$ ; assessed using the Kruskal-Wallis test).

#### 4. Discussion

This large multicenter observational cohort study examined 7811 patients with COVID-19 over an extended period and multiple phases of the COVID-pandemic. We found that hyponatremia was highly prevalent but not associated with higher mortality rates. Although less prevalent, hypernatremia was associated with a three-to-four-fold increased risk of worse outcomes, including increased risk of ICU-admission, intubation, and mortality. Hyponatremia was also associated with a higher risk for ICU-admission, but not for intubation.

Patients with hyponatremia experienced more complications such as aspergillosis pneumonia and physical decline, while those with hypernatremia were more prone to sepsis and delirium. Similar to previous studies, hypo- and hypernatremia were more prevalent in males than in females, in elderly patients, those with chronic kidney disease, and a lower BMI<sup>4 6 28 33 35-37 44</sup>. In contrast to others, we did not find an association between hyponatremia and diabetes, which possibly relates to the fact that we corrected sodium levels for serum glucose<sup>4 6 28 33 37</sup>. Among COVID-19 patients, hyponatremia appeared to have multiple etiologies, but hypovolemic hyponatremia was found to be predominant.

The incidence of hyponatremia among COVID-19 patients in this study was 34.3%, which is higher than the pooled prevalence of hyponatremia in previous systematic reviews which included studies conducted during the earlier COVID-19-waves 24% to 25.8%<sup>23 25</sup>. However, it aligns with Tezcan, et al.<sup>39</sup> Voets, et al.<sup>45</sup>, and Sarvazad, et al.<sup>38</sup>, who reported rates of 34%, 35.8% and 38%, respectively (the latter study included only patients without underlying disease), although even higher incidences have been reported<sup>5 8 9 24 35</sup>. The incidence of hyponatremia in COVID-19 was also found to be higher compared to hyponatremia in other types of pneumonia: 5.4% - 28%<sup>6 7 27 45 46</sup>. Hyponatremia is most common in pneumonias caused by viral pathogens (e.g. rhinovirus, respiratory syncytial virus, (para)influenza virus, and adenovirus) with a incidence reported of 17.6%, as compared to 13.8% in patients with bacterial pneumonias<sup>46</sup>. Patients presenting with hyponatremia in this study were significantly older compared to patients with normonatremia, potentially due to age-related tubular atrophy and subsequent decreased urine concentrating capacity and sodium reabsorption<sup>47</sup>. The fact that previous studies have identified various other underlying conditions as risk factors for hyponatremia, including cardiac<sup>28</sup>, pulmonary<sup>28</sup>, and liver diseases<sup>28</sup> possibly relates to the older age of patients with

1  
2  
3 hyponatremia included (median age was 67 years in our study versus a mean age of 74.3 years in  
4 Chan, et al. <sup>28</sup> and a median age of 70 years in Ruiz-Sánchez, et al. <sup>44</sup>).

5  
6  
7 Hypernatremia is less common among COVID-19 patients compared to other pneumonias. We  
8 found an incidence of 1.6% among COVID-19 patients. This number is lower than the incidences  
9 reported in previous studies (2.9% - 38%)<sup>19 45</sup> and lower than the incidence of hypernatremia (5.3%)  
10 reported in patients with a community acquired pneumonia<sup>48</sup>. Patients with hypernatremia were found  
11 to be older than patients with normo- or hyponatremia. These age differences were in line with the  
12 expected age-related impairment of the thirst mechanism and potential barriers to accessible fluids (e.g.  
13 due to immobilization or dementia) which could contribute to inadequate fluid intake with subsequent  
14 development of hypernatremia<sup>32</sup>.

15  
16  
17  
18  
19  
20  
21  
22 Hyponatremia in infectious diseases can have multiple etiologies, of which SIADH,  
23 hypovolemia, and the use of diuretics are the most common, but critical illness-related corticoid  
24 insufficiency is also reported<sup>16 27</sup>. In this study we showed that multiple etiologies seem to play a role in  
25 COVID-19 patients. Among patients with hyponatremia a higher incidence of diarrhea and anosmia was  
26 observed. These symptoms could contribute to decreased appetite and subsequently lower dietary  
27 intake. Clinical investigations revealed an increased heart rate and slightly decreased systolic blood  
28 pressure, which suggests a possible hypovolemic state as an underlying cause for hyponatremia.  
29 Correspondingly, eGFR was lower in this group, despite comparable blood urea levels, which have been  
30 employed by others as measure to differentiate euvolemic from hypovolemic hyponatremia<sup>36</sup>. This  
31 hypovolemia could result from both reduced dietary intake and dehydration due to diarrhea. The low  
32 median USE (30 mmol/L) in a proportion of patients also points to extrarenal sodium loss and a  
33 hypovolemic status<sup>49</sup>. However, due to the limited number of patients with USE measurements, these  
34 findings should be interpreted as supportive rather than definitive evidence.

35  
36  
37  
38  
39  
40  
41  
42  
43  
44  
45  
46  
47 Moreover, patients presenting with hyponatremia had higher serum concentrations of LDH and  
48 CRP. A relationship between serum CRP and sodium concentration has been observed in other  
49 infectious diseases and has also been demonstrated in COVID-19 patients<sup>5 28 35</sup>. This phenomenon has  
50 been attributed to release of cytokines such as interleukin-6 and interleukin-1 $\beta$ <sup>50</sup>, which can affect the  
51 secretion of ADH and potentially contribute to the development of SIADH<sup>10 30</sup>. In COVID-19 patients,  
52 elevated levels of interleukin-6 and interleukin-1 $\beta$  have been noted<sup>37 51 52</sup>. Furthermore, a negative  
53 correlation between interleukin-6 and sodium levels has been demonstrated, implying a similar  
54  
55  
56  
57  
58  
59  
60



1  
2  
3 mechanism in the development of hyponatremia<sup>21 36</sup>. It is important to note that although administration  
4 of interleukin-6 receptor antagonists (tocilizumab and sarilumab) and interleukin-1 receptor antagonist  
5 (anakinra) was similar between groups, this observation does not undermine the aforementioned  
6 hypothesis, as these agents were administered based on indirect markers of interleukin release such  
7 as disease severity and CRP levels. Additionally, most patients in the study were included before  
8 registration of these agents for COVID-19 treatment, and the sample sizes of the groups might have  
9 been too small to draw definitive conclusions on the relationship between cytokine levels and  
10 hyponatremia in COVID-19 patients.  
11  
12  
13  
14  
15  
16  
17

18 Contrary to previous studies and in contrast to patients with community acquired pneumonia,  
19 we did not find SIADH as frequent cause of hyponatremia in COVID-19 patients<sup>2 25 37 53</sup>. In our study,  
20 only a small proportion of USE + UOL samples complied with the definition of SIADH, and a correlation  
21 between low urinary sodium excretion and serum CRP concentration was found, which is in contrast to  
22 the theory that interleukin-6 induces ADH release (Supplemental Table 6). The overall incidence of  
23 SIADH in our study suggests that SIADH is a less frequent cause of hyponatremia among COVID-19  
24 patients, compared to hyponatremia in patients with other pneumonias. This is possibly because  
25 COVID-19 more often causes diarrhea thereby also leading to other causes of hyponatremia. Frontera,  
26 et al.<sup>37</sup> reported a prevalence of 36% of SIADH among COVID-19 patients that presented with a serum  
27 sodium level  $\leq 120$  mmol/L. However, in our study population, less than 1% presented with a sodium  
28 level this low, and mild and severe hyponatremia differ in pathophysiology. Previous studies that  
29 identified SIADH as a frequent underlying mechanism of hyponatremia in COVID-19 patients based  
30 their information mostly on case reports, which likely focused on more severe cases<sup>25</sup>. The fact that in  
31 our study urinary investigation was not performed in all patients with hyponatremia may suggest that  
32 hyponatremia was not persistent or was otherwise not found to be severe enough to do so. This could  
33 also contribute to the lower incidence of confirmed SIADH cases in our study.  
34  
35  
36  
37  
38  
39  
40  
41  
42  
43  
44  
45  
46  
47  
48

49 The association between thiazide diuretics and hyponatremia is well-established. Thiazide  
50 diuretics are known to increase the risk of developing hyponatremia due to their effects on renal sodium  
51 and water excretion<sup>54</sup>. Therefore, it is not surprising that patients with hyponatremia more frequently  
52 used thiazide diuretics. The use of immunosuppressive medications, such as glucocorticoids, was also  
53 related to hyponatremia. Glucocorticoids can potentially affect the body's water and electrolyte  
54 imbalance, including sodium levels. The development of iatrogenic adrenal insufficiency, resulting from  
55  
56  
57  
58  
59  
60

1  
2  
3 the (prior) prescription of steroids, can contribute to relative glucocorticoid efficiency and potentially lead  
4  
5 to hyponatremia<sup>55 56</sup>.

6  
7 We did not find a significant association between hyponatremia and the risk of mortality or  
8  
9 intubation, although ICU admission rates were higher in the hyponatremia group. These results are in  
10  
11 line with Machiraju, et al. <sup>5</sup>, who also demonstrated a higher need for ICU admission in COVID-19  
12  
13 patients presenting with hyponatremia but could not relate hyponatremia to mortality nor the length of  
14  
15 hospital stay. Consistent with our results, Tzoulis, et al. <sup>36</sup> found no significant association between  
16  
17 hyponatremia and mortality but did relate hyponatremia to invasive ventilation and the length of hospital  
18  
19 admission. The higher serum CRP and LDH concentrations in hyponatremic patients in our study  
20  
21 indicate that these patients might be more ill compared to those with normal sodium levels, which is not  
22  
23 in line with the similar mortality rates<sup>57 58</sup>. We speculate that dehydration accompanied by hyponatremia,  
24  
25 along with elevated LDH and CRP levels were reasons for hospital admission. However, other  
26  
27 pathophysiologic mechanisms leading to worse outcomes were absent in these patients, favoring a  
28  
29 relatively good outcome.

30  
31 Our findings are in contrast with previous studies, in which the presence of hyponatremia at  
32  
33 presentation was independently associated with disease severity and prolonged hospital stay <sup>28 46</sup> and  
34  
35 was thought to be an independent predictor of hospital mortality<sup>2 4 23 25 28</sup>. These studies suggest that  
36  
37 hyponatremia, especially when not corrected for serum glucose concentration<sup>59</sup>, is a significant factor in  
38  
39 determining the prognosis of patients. The observed trend towards increased mortality in patients with  
40  
41 severe hyponatremia was also demonstrated by Ruiz-Sánchez, et al. <sup>44</sup>, Chan, et al. <sup>28</sup>, and Frontera,  
42  
43 et al. <sup>37</sup>. However, the latter study obtained statistically significant results with a lower number of patients  
44  
45 (36 out of 4645, representing 1% of the population, stratified as having severe hyponatremia based on  
46  
47 sodium levels  $\leq 120$  mmol/L) compared to 1.8% in our study, which could not be confirmed by our  
48  
49 study.

50  
51 There are several potential explanations for the difference in outcomes between our study and  
52  
53 previous studies. First, previous studies only included patients that were admitted during 2020 and the  
54  
55 spring of 2021, the beginning of the COVID-19 pandemic<sup>2 4 19 23 25</sup>. In large previous studies, mortality  
56  
57 rates between 22.6-28.9% have been reported<sup>6 59</sup>. In contrast, our study included patients from the  
58  
59 beginning of the COVID-19 pandemic until August 2022 and the overall mortality in our study was 16.7%.  
60  
Moreover, we observed significant variations in mortality, ICU-admission, and intubation rates in the

1  
2  
3 normo- and hyponatremia groups differed significantly between patients that were included during the  
4 initial wave in the spring of 2020 (when original SARS-CoV-2 variants dominated) and those included in  
5 subsequent COVID-19 waves (with alpha, delta, and omicron variants dominating in the last quartile of  
6 patients included). These differences in outcomes are likely attributed to increased knowledge about  
7 the disease, the development of new treatments such as dexamethasone and tocilizumab, and the  
8 commencement of widespread vaccination campaigns starting in January 2021. It is important to note  
9 that a study by Chan, et al.<sup>28</sup> included patients from late 2021 and early 2022 and still found an  
10 association between hyponatremia and adverse outcomes. However, these results may not be directly  
11 comparable to our study due to potential differences in vaccine efficacy and COVID-19 policies between  
12 Hong-Kong and Western countries<sup>60</sup>. These variations in patient cohorts and treatment strategies could  
13 influence outcomes and thus could lead to different results as compared to other studies. We speculate  
14 that the absence of a higher risk of adverse outcomes in COVID-19 patients presenting with  
15 hyponatremia, contrary to previous studies, could be partly attributed to the overall decrease in mortality  
16 as the pandemic progressed.

17  
18  
19  
20  
21  
22  
23  
24  
25  
26  
27  
28  
29  
30  
31  
32  
33  
34  
35  
36  
37  
38  
39  
40  
41  
42  
43  
44  
45  
46  
47  
48  
49  
50  
51  
52  
53  
54  
55  
56  
57  
58  
59  
60

Second, previous studies examined uncorrected sodium concentration at presentation as a prognostic factor and found increased mortality rates in patients with hyponatremia<sup>4 24 25 33 35 37 39 44 61</sup>. However, other studies that corrected for serum glucose concentration when these exceeded 10 mmol/L, found no significant association between hyponatremia and mortality<sup>36</sup>. Hirsch, et al.<sup>59</sup> demonstrated that the association between hyponatremia and mortality was only evident prior to correction for serum glucose concentration, and the association disappeared after correcting for glucose levels. These findings are similar to studies conducted outside the context of COVID-19<sup>62</sup>. In our study, uncorrected hyponatremia was associated with an elevated risk of ICU admission and intubation, whereas corrected hyponatremia did not show an association between hyponatremia and intubation. This suggests that a similar effect related to the correction of sodium levels for glucose concentration could explain the discrepancies between our study and previous studies<sup>37 44</sup>.

The association between ICU admission and hyponatremia was most pronounced in patients with a hyponatremia of unknown etiology. However, it is important to consider that this group may include mild presentations of SIADH due to the limited number of urinary samples available. These findings align with the higher CRP and LDH levels observed in this group. Patients that had a history of gastro-intestinal symptoms had a lower risk of ICU admission, despite having higher levels of CRP and

1  
2  
3 LDH levels. The higher CRP and LDH levels in this group could not be related to the SARS-CoV-2  
4 variants, as the highest CRP levels were observed in patients that developed symptoms during a period  
5 in which the delta variant dominated. Notably, this group also had the lowest prevalence of gastro-  
6 intestinal symptoms (data not shown).  
7  
8  
9

10 In contrast to the findings in patients with hyponatremia, our study revealed a significant  
11 association between hypernatremia and adverse outcomes such as ICU-admission, intubation, and  
12 death. While there were no significant differences in serum CRP and LDH concentration, as well as CT-  
13 severity scores at admission, between hypernatremic and normonatremic patients, higher MEWS and  
14 qSOFA scores indicated that a greater extent of lung tissue in hypernatremic patients. Furthermore,  
15 elevated serum urea concentration, lower eGFR, and a prolonged capillary refill time suggested  
16 dehydration in this group of patients. These findings collectively point towards a more severely ill patient  
17 population, which could account for the worse clinical outcomes observed. The association between  
18 hypernatremia and worse clinical outcomes has been previously documented in COVID-19<sup>14</sup> and other  
19 type of pneumonias<sup>48</sup>.  
20  
21  
22  
23  
24  
25  
26  
27  
28  
29

30 Our study on hyponatremia in COVID-19 is characterized by its large size, including over 7000  
31 patients from various hospitals across Netherlands. A notable strength of our study lies in the inclusion  
32 of patients from different waves of the COVID-19 and from multiple hospitals, both university and  
33 general. This approach resulted in a diverse patient population, making our findings applicable to the  
34 current situation. Furthermore, our study benefitted from the availability of a large amount of clinical data  
35 being available for each patient. This allowed us to analyze the associations we discovered in  
36 conjunction with relevant patient background details. For instance, we had access to vital signs recorded  
37 at admission, providing us with a more comprehensive understanding of the patients' condition upon  
38 admission compared to previous studies<sup>37 44</sup>. Consequently, we were able to offer more substantiated  
39 insights into the presumed underlying etiology and how the different etiologies were related to clinical  
40 outcomes.  
41  
42  
43  
44  
45  
46  
47  
48  
49  
50

51 This study has several limitations that should be acknowledged. Firstly, the availability of urinary  
52 samples of patients with hyponatremia (185 out of the total) limits the generalizability of our findings.  
53 Additionally, information on the duration of hyponatremia in participating patients was not provided.  
54 Exploring these aspects would have been valuable, as a previous study by de La Flor, et al.<sup>14</sup>  
55 demonstrated that persistent hyponatremia (72 – 96h after admission) was associated with higher  
56  
57  
58  
59  
60

1  
2  
3 mortality in COVID-19 patients. Secondly, the variability in treatment protocols among the participating  
4 hospital may have influenced outcome of patients in our study. Lastly, we were unable to study specific  
5 treatment options for hyponatremia in patients.  
6  
7

8  
9 Our results suggest that while hyponatremia is commonly observed among COVID-19 patients,  
10 it is not associated with adverse clinical outcome. However, the presence of hypernatremia should be  
11 of concern to clinicians, as it is indicative of a poorer prognosis. To enhance our understanding of the  
12 etiology of hyponatremia in COVID-19, future studies should focus on monitoring the clinical course of  
13 hyponatremia during hospitalization, documenting the duration of hyponatremia, and recording the  
14 treatment administered. It is crucial to obtain urinary samples from all patients presenting with COVID-  
15 19 and hyponatremia to further elucidate the underlying causes. Moreover, further research is warranted  
16 to investigate the incidence and potential mechanisms of SIADH in relation to disease severity and  
17 inflammation. More specifically, studies examining the relationship with interleukin-6 would be valuable,  
18 given that the interleukin-6 antagonist tocilizumab is used in the treatment of patients with moderate to  
19 severe COVID-19.  
20  
21  
22  
23  
24  
25  
26  
27  
28  
29  
30  
31  
32  
33  
34  
35  
36  
37  
38  
39  
40  
41  
42  
43  
44  
45  
46  
47  
48  
49  
50  
51  
52  
53  
54  
55  
56  
57  
58  
59  
60

## 5. Conclusion

Hyponatremia is a common electrolyte disorder found in one third of patients hospitalized with COVID-19. Several risk factors have been identified, including male sex assigned at birth, a slightly lower BMI, pre-existing conditions like chronic kidney disease, hypertension, as well as the use of certain medications such as the use of thiazide diuretics and immunosuppressives. We found that hyponatremia was not associated with a higher need for invasive ventilation nor with mortality. In contrast, hypernatremia was associated with worse outcomes as compared to normonatremia. Regarding the underlying pathophysiological mechanisms, hypovolemic hyponatremia appeared to be the predominant mechanism in COVID-19 patients. Other causes of hyponatremia, such as SIADH, were less commonly observed in our study population.

## Contributorship Statement

LRdH, MtW, and RAD conceptualized and designed the study, and were responsible for the planning, conduct, data analysis and interpretation. LRdH drafted the article supervised by MtW, and RAD. Figures and tables were designed by LRdH. LRdH, MtW, RAD, MB, RHOE, BA, EKHH, DR, NCGvdO, SS, NP, JPvdB, CEW, MdK, TD, HM, NB, and KB were responsible for the inclusion of patients and data entry in the COVID-PREDICT database in their respective centers on behalf of the COVID-PREDICT study group. MB, RHOE, BA, EKHH, DR, NCGvdO, SS, NP, JPvdB, CEW, MdK, TD, HM, NB, and KB critically revised the manuscript and supplemental material. All authors provided final approval of the manuscript and accepted responsibility for the integrity and accuracy of the work. They also ensured that any inquiries regarding the work's integrity or accuracy would be thoroughly investigated and resolved.

## Competing of interest

The authors declare that there is no conflict of interest.

## Funding

This research received no specific grant from any funding agency in the public, commercial, or not-for-profit sectors.

## Data sharing statement

No data are available. Not all patients provided active informed consent, and therefore sharing data is not possible.

## Ethics approval

The ethical board of the Amsterdam University Medical Centers (20.131) approved the study protocol.

## Acknowledgements

We want to acknowledge the contribution of the CovidPredict working group, including the clinicians that contributed to data collection and the students responsible for data entry, and we would like to acknowledge E. Martens for his help with the analysis.

## References

1. Shrestha AB, Sapkota UH, Shrestha S, et al. Association of hyponatremia with outcomes of COVID-19 patients: A protocol for systematic review and meta-analysis. *Medicine (Baltimore)* 2022;101(51):e32535. doi: 10.1097/md.00000000000032535 [published Online First: 2023/01/04]
2. Ayus JC, Kalantar-Zadeh K, Tantisattamo E, et al. Is hyponatremia a novel marker of inflammation in patients with COVID 19? *Nephrol Dial Transplant* 2023 doi: 10.1093/ndt/gfad111 [published Online First: 2023/05/28]
3. Chen N, Zhou M, Dong X, et al. Epidemiological and clinical characteristics of 99 cases of 2019 novel coronavirus pneumonia in Wuhan, China: a descriptive study. *Lancet* 2020;395(10223):507-13. doi: 10.1016/s0140-6736(20)30211-7 [published Online First: 2020/02/03]
4. Królicka A, Letachowicz K, Adamik B, et al. Dysnatremia in COVID-19 Patients-An Analysis of the COLOS Study. *J Clin Med* 2023;12(8) doi: 10.3390/jcm12082802 [published Online First: 2023/04/28]
5. Machiraju PK, Alex NM, Safinaaz, et al. Hyponatremia in Coronavirus Disease-19 Patients: A Retrospective Analysis. *Can J Kidney Health Dis* 2021;8:20543581211067069. doi: 10.1177/20543581211067069 [published Online First: 2022/01/11]
6. Liu D, Mowrey W, Fisher M, et al. Associations of Dysnatremia with COVID-19 Status and Mortality. *Kidney360* 2022;3(8):1323-31. doi: 10.34067/kid.0001062022 [published Online First: 2022/10/01]
7. Gustafson BD, Zhao Y, Milkovits AE, et al. Incidence of Hyponatremia Among Critically Ill Patients With and Without COVID-19 Infection at a Community Teaching Hospital. *J Intensive Care Med* 2023:8850666231170760. doi: 10.1177/08850666231170760 [published Online First: 2023/04/20]

- 1
  - 2
  - 3
  - 4
  - 5
  - 6
  - 7
  - 8
  - 9
  - 10
  - 11
  - 12
  - 13
  - 14
  - 15
  - 16
  - 17
  - 18
  - 19
  - 20
  - 21
  - 22
  - 23
  - 24
  - 25
  - 26
  - 27
  - 28
  - 29
  - 30
  - 31
  - 32
  - 33
  - 34
  - 35
  - 36
  - 37
  - 38
  - 39
  - 40
  - 41
  - 42
  - 43
  - 44
  - 45
  - 46
  - 47
  - 48
  - 49
  - 50
  - 51
  - 52
  - 53
  - 54
  - 55
  - 56
  - 57
  - 58
  - 59
  - 60
8. Taci Hoca N, Berktaş BM. Baseline electrolyte disorders predict disease severity and mortality in patients with COVID-19. *Medicine (Baltimore)* 2022;101(51):e32397. doi: 10.1097/md.00000000000032397 [published Online First: 2023/01/04]
9. Sjöström A, Rysz S, Sjöström H, et al. Electrolyte and acid-base imbalance in severe COVID-19. *Endocr Connect* 2021;10(7):805-14. doi: 10.1530/ec-21-0265 [published Online First: 2021/06/23]
10. Nogueira GM, Silva N, Moura AF, et al. Acute kidney injury and electrolyte disorders in COVID-19. *World J Virol* 2022;11(5):283-92. doi: 10.5501/wjv.v11.i5.283 [published Online First: 2022/10/04]
11. Atlani M, Kumar A, Pakhare AP, et al. Potential Association of Hypernatremia With Mortality in Patients With Acute Kidney Injury and COVID-19. *Cureus* 2022;14(7):e27530. doi: 10.7759/cureus.27530 [published Online First: 2022/09/06]
12. Genovesi S, Regolisti G, Rebora P, et al. Negative prognostic impact of electrolyte disorders in patients hospitalized for Covid-19 in a large multicenter study. *J Nephrol* 2023;36(3):621-26. doi: 10.1007/s40620-022-01429-3 [published Online First: 2022/08/25]
13. Sabaghian T, Honarvar M, Safavi-Naini SAA, et al. Effect of Electrolyte Imbalance on Mortality and Late Acute Kidney Injury in Hospitalized COVID-19 Patients. *Iran J Kidney Dis* 2022;16(4):228-37. [published Online First: 2022/08/14]
14. de La Flor JC, Gomez-Berrocal A, Marschall A, et al. The impact of the correction of hyponatremia during hospital admission on the prognosis of SARS-CoV-2 infection. *Med Clin (Engl Ed)* 2022;159(1):12-18. doi: 10.1016/j.medcle.2021.07.021 [published Online First: 2022/07/06]
15. Malieckal DA, Uppal NN, Ng JH, et al. Electrolyte abnormalities in patients hospitalized with COVID-19. *Clin Kidney J* 2021;14(6):1704-07. doi: 10.1093/ckj/sfab060 [published Online First: 2021/06/04]
16. Honore PM, Redant S, Preseau T, et al. Understanding the Underlying Mechanisms of Hyponatremia in Coronavirus Disease 2019 Is Critical Since Treatment Varies Based on Etiology: Let Us Not Forget Critical Illness-Related Corticosteroid Insufficiency As the Treatment Is Very Different and Often Lifesaving! *Crit Care Med* 2021;49(7):e724-e25. doi: 10.1097/ccm.0000000000005006 [published Online First: 2021/04/20]
17. Environment NifPHat. Variants of the coronavirus SARS-CoV-2. <https://www.rivm.nl> 2023
18. Wu Y, Hou B, Liu J, et al. Risk Factors Associated With Long-Term Hospitalization in Patients With COVID-19: A Single-Centered, Retrospective Study. *Front Med (Lausanne)* 2020;7:315. doi: 10.3389/fmed.2020.00315 [published Online First: 2020/06/26]
19. Tzoulis P, Grossman AB, Baldeweg SE, et al. MANAGEMENT OF ENDOCRINE DISEASE: Dysnatraemia in COVID-19: prevalence, prognostic impact, pathophysiology, and management. *Eur J Endocrinol* 2021;185(4):R103-r11. doi: 10.1530/eje-21-0281 [published Online First: 2021/08/10]
20. Horby P, Lim WS, Emberson JR, et al. Dexamethasone in Hospitalized Patients with Covid-19 - Preliminary Report. *N Engl J Med* 2020 doi: 10.1056/NEJMoa2021436 [published Online First: 2020/07/18]
21. Berni A, Malandrino D, Parenti G, et al. Hyponatremia, IL-6, and SARS-CoV-2 (COVID-19) infection: may all fit together? *J Endocrinol Invest* 2020;43(8):1137-39. doi: 10.1007/s40618-020-01301-w [published Online First: 2020/05/27]
22. COVID-PREDICT-werkgroep. Klinisch beloop van covid-19 in Nederland. *NTVG* 2021;165



23. Akbar MR, Pranata R, Wibowo A, et al. The Prognostic Value of Hyponatremia for Predicting Poor Outcome in Patients With COVID-19: A Systematic Review and Meta-Analysis. *Front Med (Lausanne)* 2021;8:666949. doi: 10.3389/fmed.2021.666949 [published Online First: 2021/07/02]
24. Islam MK, Hasan P, Sharif MM, et al. Hyponatremia in COVID-19 patients: Experience from Bangladesh. *Health Sci Rep* 2022;5(2):e565. doi: 10.1002/hsr2.565 [published Online First: 2022/03/22]
25. Khidir RJY, Ibrahim BAY, Adam MHM, et al. Prevalence and outcomes of hyponatremia among COVID-19 patients: A systematic review and meta-analysis. *Int J Health Sci (Qassim)* 2022;16(5):69-84. [published Online First: 2022/09/15]
26. Upadhyay A, Jaber BL, Madias NE. Incidence and prevalence of hyponatremia. *Am J Med* 2006;119(7 Suppl 1):S30-5. doi: 10.1016/j.amjmed.2006.05.005 [published Online First: 2006/07/18]
27. Liamis G, Milionis HJ, Elisaf M. Hyponatremia in patients with infectious diseases. *J Infect* 2011;63(5):327-35. doi: 10.1016/j.jinf.2011.07.013 [published Online First: 2011/08/13]
28. Chan GCK, Wong CK, So BYF, et al. Epidemiology and outcomes of hyponatremia in patients with COVID-19-A territory-wide study in Hong Kong. *Front Med (Lausanne)* 2022;9:1096165. doi: 10.3389/fmed.2022.1096165 [published Online First: 2023/01/31]
29. Rondon-Berrios H, Agaba EI, Tzamaloukas AH. Hyponatremia: pathophysiology, classification, manifestations and management. *Int Urol Nephrol* 2014;46(11):2153-65. doi: 10.1007/s11255-014-0839-2 [published Online First: 2014/09/25]
30. Hodax JK, Bialo SR, Yalcindag A. SIADH in Systemic JIA Resolving After Treatment With an IL-6 Inhibitor. *Pediatrics* 2018;141(1) doi: 10.1542/peds.2016-4174 [published Online First: 2017/12/16]
31. Salama C, Han J, Yau L, et al. Tocilizumab in Patients Hospitalized with Covid-19 Pneumonia. *N Engl J Med* 2021;384(1):20-30. doi: 10.1056/NEJMoa2030340 [published Online First: 2020/12/18]
32. Kugler JP, Hustead T. Hyponatremia and hypernatremia in the elderly. *Am Fam Physician* 2000;61(12):3623-30. [published Online First: 2000/07/13]
33. Hu W, Lv X, Li C, et al. Disorders of sodium balance and its clinical implications in COVID-19 patients: a multicenter retrospective study. *Intern Emerg Med* 2021;16(4):853-62. doi: 10.1007/s11739-020-02515-9 [published Online First: 2020/10/17]
34. Martino M, Falcioni P, Giancola G, et al. Sodium alterations impair the prognosis of hospitalized patients with COVID-19 pneumonia. *Endocr Connect* 2021;10(10):1344-51. doi: 10.1530/ec-21-0411 [published Online First: 2021/09/18]
35. Ayus JC, Negri AL, Moritz ML, et al. Hyponatremia, Inflammation at Admission, and Mortality in Hospitalized COVID-19 Patients: A Prospective Cohort Study. *Front Med (Lausanne)* 2021;8:748364. doi: 10.3389/fmed.2021.748364 [published Online First: 2021/12/21]
36. Tzoulis P, Waung JA, Bagkeris E, et al. Dysnatremia is a Predictor for Morbidity and Mortality in Hospitalized Patients with COVID-19. *J Clin Endocrinol Metab* 2021;106(6):1637-48. doi: 10.1210/clinem/dgab107 [published Online First: 2021/02/25]
37. Frontera JA, Valdes E, Huang J, et al. Prevalence and Impact of Hyponatremia in Patients With Coronavirus Disease 2019 in New York City. *Crit Care Med* 2020;48(12):e1211-e17. doi: 10.1097/ccm.0000000000004605 [published Online First: 2020/08/23]

38. Sarvazad H, Cahngaripour SH, Eskandari Roozbahani N, et al. Evaluation of electrolyte status of sodium, potassium and magnesium, and fasting blood sugar at the initial admission of individuals with COVID-19 without underlying disease in Golestan Hospital, Kermanshah. *New Microbes New Infect* 2020;38:100807. doi: 10.1016/j.nmni.2020.100807 [published Online First: 2020/12/10]
39. Tezcan ME, Dogan Gokce G, Sen N, et al. Baseline electrolyte abnormalities would be related to poor prognosis in hospitalized coronavirus disease 2019 patients. *New Microbes New Infect* 2020;37:100753. doi: 10.1016/j.nmni.2020.100753 [published Online First: 2020/09/10]
40. Prokop M, van Everdingen W, van Rees Vellinga T, et al. CO-RADS: A Categorical CT Assessment Scheme for Patients Suspected of Having COVID-19-Definition and Evaluation. *Radiology* 2020;296(2):E97-e104. doi: 10.1148/radiol.2020201473 [published Online First: 2020/04/28]
41. Hillier TA, Abbott RD, Barrett EJ. Hyponatremia: evaluating the correction factor for hyperglycemia. *Am J Med* 1999;106(4):399-403. doi: 10.1016/s0002-9343(99)00055-8 [published Online First: 1999/05/04]
42. Inker LA, Eneanya ND, Coresh J, et al. New Creatinine- and Cystatin C-Based Equations to Estimate GFR without Race. *N Engl J Med* 2021;385(19):1737-49. doi: 10.1056/NEJMoa2102953 [published Online First: 2021/09/24]
43. van der Woude SW, van Doormaal FF, Hutten BA, et al. Classifying sepsis patients in the emergency department using SIRS, qSOFA or MEWS. *Neth J Med* 2018;76(4):158-66. [published Online First: 2018/05/31]
44. Ruiz-Sánchez JG, Núñez-Gil IJ, Cuesta M, et al. Prognostic Impact of Hyponatremia and Hypernatremia in COVID-19 Pneumonia. A HOPE-COVID-19 (Health Outcome Predictive Evaluation for COVID-19) Registry Analysis. *Front Endocrinol (Lausanne)* 2020;11:599255. doi: 10.3389/fendo.2020.599255 [published Online First: 2020/12/18]
45. Voets PJ, Frölke SC, Vogtländer NP, et al. COVID-19 and dysnatremia: A comparison between COVID-19 and non-COVID-19 respiratory illness. *SAGE Open Med* 2021;9:20503121211027778. doi: 10.1177/20503121211027778 [published Online First: 2021/07/16]
46. Królicka AL, Kruczkowska A, Krajewska M, et al. Hyponatremia in Infectious Diseases- A Literature Review. *Int J Environ Res Public Health* 2020;17(15) doi: 10.3390/ijerph17155320 [published Online First: 2020/07/29]
47. Chang-Panesso M. Acute kidney injury and aging. *Pediatr Nephrol* 2021;36(10):2997-3006. doi: 10.1007/s00467-020-04849-0 [published Online First: 2021/01/08]
48. Tokgöz Akyil F, Akyil M, Çoban Ağca M, et al. Hyponatremia prolongs hospital stay and hypernatremia better predicts mortality than hyponatremia in hospitalized patients with community-acquired pneumonia. *Tuberk Toraks* 2019;67(4):239-47. doi: 10.5578/tt.68779 [published Online First: 2020/02/14]
49. Spasovski G, Vanholder R, Allolio B, et al. Clinical practice guideline on diagnosis and treatment of hyponatraemia. *Intensive Care Med* 2014;40(3):320-31. doi: 10.1007/s00134-014-3210-2 [published Online First: 2014/02/25]
50. Park SJ, Shin JI. Inflammation and hyponatremia: an underrecognized condition? *Korean J Pediatr* 2013;56(12):519-22. doi: 10.3345/kjp.2013.56.12.519 [published Online First: 2014/01/15]
51. Leaf DE, Gupta S, Wang W. Tocilizumab in Covid-19. *N Engl J Med* 2021;384(1):86-87. doi: 10.1056/NEJMc2032911 [published Online First: 2020/12/29]
52. Soy M, Keser G, Atagündüz P, et al. Cytokine storm in COVID-19: pathogenesis and overview of anti-inflammatory agents used in treatment. *Clin Rheumatol*

- 2020;39(7):2085-94. doi: 10.1007/s10067-020-05190-5 [published Online First: 2020/06/01]
53. Cuesta M, Slattery D, Goulden EL, et al. Hyponatraemia in patients with community-acquired pneumonia; prevalence and aetiology, and natural history of SIAD. *Clin Endocrinol (Oxf)* 2019;90(5):744-52. doi: 10.1111/cen.13937 [published Online First: 2019/01/19]
54. Filippone EJ, Ruzieh M, Foy A. Thiazide-Associated Hyponatremia: Clinical Manifestations and Pathophysiology. *Am J Kidney Dis* 2020;75(2):256-64. doi: 10.1053/j.ajkd.2019.07.011 [published Online First: 2019/10/14]
55. Garrahy A, Thompson CJ. Hyponatremia and Glucocorticoid Deficiency. *Front Horm Res* 2019;52:80-92. doi: 10.1159/000493239 [published Online First: 2020/02/26]
56. Rodríguez Virgili J, Cabal García AA. [Iatrogenic adrenal insufficiency]. *Semergen* 2012;38(7):468-71. doi: 10.1016/j.semerg.2011.10.005 [published Online First: 2012/10/02]
57. Li K, Wu J, Wu F, et al. The Clinical and Chest CT Features Associated With Severe and Critical COVID-19 Pneumonia. *Invest Radiol* 2020;55(6):327-31. doi: 10.1097/rli.0000000000000672 [published Online First: 2020/03/03]
58. Salvatore C, Roberta F, Angela L, et al. Clinical and laboratory data, radiological structured report findings and quantitative evaluation of lung involvement on baseline chest CT in COVID-19 patients to predict prognosis. *Radiol Med* 2020:1-11. doi: 10.1007/s11547-020-01293-w [published Online First: 2020/10/14]
59. Hirsch JS, Uppal NN, Sharma P, et al. Prevalence and outcomes of hyponatremia and hypernatremia in patients hospitalized with COVID-19. *Nephrol Dial Transplant* 2021;36(6):1135-38. doi: 10.1093/ndt/gfab067 [published Online First: 2021/03/17]
60. Graña C, Ghosn L, Evrenoglou T, et al. Efficacy and safety of COVID-19 vaccines. *Cochrane Database Syst Rev* 2022;12(12):Cd015477. doi: 10.1002/14651858.Cd015477 [published Online First: 2022/12/07]
61. Atila C, Sailer CO, Bassetti S, et al. Prevalence and outcome of dysnatremia in patients with COVID-19 compared to controls. *Eur J Endocrinol* 2021;184(3):409-18. doi: 10.1530/eje-20-1374 [published Online First: 2021/01/16]
62. Waikar SS, Mount DB, Curhan GC. Mortality after hospitalization with mild, moderate, and severe hyponatremia. *Am J Med* 2009;122(9):857-65. doi: 10.1016/j.amjmed.2009.01.027 [published Online First: 2009/08/25]

## Figure legends

**Figure 1.** Hazard ratios of cox proportional survival curves for survival probability for each sodium value adjusted for age, sex assigned at birth, a history of chronic kidney disease, and a history of hypertension. The grey area indicates the normonatremia. Table shows hazard ratios for covariates and sodium as a continuous variable (**A**). Cox proportional survival curves at the mean of covariates for (**B**) unadjusted 6-week mortality stratified by normo-, hypo-, and hypernatremia, (**C**) 6-week mortality adjusted for age, sex assigned at birth, a history of chronic kidney disease, and a history of hypertension stratified in normo-, hypo-, and hypernatremia, (**D**) Unadjusted 6-week mortality stratified by etiology. \*\* indicates a p-value <0.01, \*\*\* indicates a p-value <0.001

**Figure 2.** Odds ratio for adverse outcomes (death / palliative discharge (**A**), intensive care unit admission (**B**) invasive ventilation (**C**)) in each quartile compared to patients in the first quartile (admitted before 27-03-2020; N = 2002) for patients with hypo-, hyper-, or normonatremia at admission. \* Indicates a p-value <0.05, \*\* indicates a p-value < 0.01, \*\*\* indicates a p-value <0.001 for the odds ratio as calculated by binary logistic regression. (**D**) incidence of hypo-, normo-, and hypernatremia in each quartile, \*\*\* indicates a p-value <0.001 as compared to the first quartile for the chi-square statistic with Bonferroni post-hoc correction.

**Table 1** – Comparison of patient characteristics between COVID-19 patients with hypo-, normo-, and hypernatremia

|                                             | <b>Hyponatremia</b><br>Na 134 mmol/L<br>N = 2677     | <b>Normonatremia</b><br>Na 136 – 145 mmol/L<br>N = 5008 | <b>Hypernatremia</b><br>Na 146 mmol/L<br>N = 126     |
|---------------------------------------------|------------------------------------------------------|---------------------------------------------------------|------------------------------------------------------|
| Sex assigned at birth (N (%))               | ♂ 1673 (62.5%)<br>♀ 1003 (37.5%)<br><b>p = 0.002</b> | ♂ 2946 (58.8 %)<br>♀ 2060 (41.2 %)                      | ♂ 84 (66.7%)<br>♀ 42 (33.3%)                         |
| Age (median age in years (IQR))             | N = 2675<br>67.0 (58.0-77.0)<br><b>p &lt; 0.001</b>  | N = 5008<br>66.1 (55.0-76.0)                            | N = 126<br>72.5 (62.8 – 80.3)<br><b>p &lt; 0.001</b> |
| BMI (median BMI in kg/m <sup>2</sup> (IQR)) | N = 1740<br>27.2 (24.2 – 31.1)<br><b>p = 0.009</b>   | N = 3374<br>27.7 (24.6 – 31.6)                          | N = 91<br>25.0 (22.2 – 29.1)<br><b>p &lt; 0.001</b>  |
| Order 'Do not intubate' (N (%))             | 440 / 1442 (30.5 %)                                  | 796 / 2469 (32.2 %)                                     | 39 / 77 (50.6 %)<br><b>p = 0.004</b>                 |
| Chronic cardiac disease (N (%))             | 760 / 2666 (28.5%)<br>p = 0.07                       | 1334 / 4982 (26.8 %)                                    | 42 / 123 (34.1 %)<br>p = 0.07                        |
| Hypertension (N (%))                        | 1055 / 2374 (44.4 %)<br><b>p = 0.002</b>             | 1889 / 4586 (41.2 %)                                    | 64 / 120 (53.3 %)                                    |
| Chronic pulmonary disease (N (%))           | 466 / 2662 (17.5 %)<br>p = 0.75                      | 844 / 4979 (17.0 %)                                     | 19 / 122 (15.6 %)<br>p = 0.75                        |
| Chronic kidney disease (N (%))              | 329 / 2379 (13.8 %)<br><b>p &lt; 0.001</b>           | 491 / 4587 (10.7 %)                                     | 26 / 121 (21.5 %)<br><b>p &lt; 0.001</b>             |
| Moderate to severe liver disease (N (%))    | 30 / 2662 (1.1 %)<br>p = 0.46                        | 50 / 4972 (1.0 %)                                       | 0 / 123 (0.0 %)<br>p = 0.46                          |
| Diabetes (N (%))                            | 664 / 2662 (24.9 %)<br>p = 0.39                      | 1261 / 4972 (25.4 %)                                    | 38 / 125 (30.4 %)<br>p = 0.39                        |
| Immunosuppressives (N (%))                  | 192 / 2283 (8.4 %)<br><b>p = 0.002</b>               | 295 / 4445 (6.6 %)                                      | 2 / 118 (1.7 %)                                      |
| Thiazide diuretics (N (%))                  | 258 / 2671 (9.7 %)<br><b>p = 0.015</b>               | 394 / 4994 (7.9 %)                                      | 7 / 125 (5.6 %)                                      |
| Loop diuretics (N (%))                      | 187 / 2671 (7.0 %)<br>p = 0.22                       | 389 / 4994 (7.8 %)                                      | 13 / 125 (10.4 %)<br>p = 0.22                        |
| SSRIs / SNRIs (N (%))                       | 78 / 2671 (2.9 %)<br>p = 0.69                        | 164 / 4994 (3.3 %)                                      | 4 / 125 (3.2 %)<br>p = 0.69                          |

BMI = body mass index; IQR = interquartile range; % = percentage of patients in this group with indicated characteristic; SSRI = Selective Serotonin Reuptake inhibitor; SNRI = Selective Serotonin and Noradrenalin Reuptake inhibitor. Significance was assessed using a Kruskal-Wallis test with post-hoc correction (for numerical data; non-normally distributed) or Chi-square test (for categorical data). p – values for all groups indicate the adjusted significance after post-hoc correction when compared to the normonatremia group. When no p – value was provided there was no significant difference compared to the normonatremia group. Subgroup analyses for hyponatremia is provided in the supplemental information.

**Table 2** – Comparison of signs and symptoms at presentation between COVID-19 patients with hypo-, normo-, and hypernatremia

| Signs and symptoms                                                                                         | Hyponatremia<br>Na 134 mmol/L<br>N = 2677  | Normonatremia<br>Na 136 – 145 mmol/L<br>N = 5008 | Hypernatremia<br>Na 146 mmol/L<br>N = 126 |
|------------------------------------------------------------------------------------------------------------|--------------------------------------------|--------------------------------------------------|-------------------------------------------|
| Nausea / vomiting (N (%))                                                                                  | 679 / 2273 (29.9 %)<br>p = 0.04            | 1150 / 4129 (27.9 %)                             | 16 / 83 (19.3 %)<br>p = 0.04              |
| Diarrhea (N (%))                                                                                           | 804 / 2298 (35.0%)<br>p < 0.001            | 1146 / 4157 (27.6 %)                             | 15 / 82 (18.3 %)                          |
| Anosmia (N (%))                                                                                            | 244 / 1904 (12.8 %)<br>p = 0.002           | 352 / 3330 (10.6 %)                              | 1 / 66 (1.5 %)                            |
| Confusion (N (%))                                                                                          | 311 / 2319 (13.4%)                         | 651 / 4381 (14.9 %)                              | 45 / 105 (42.9 %)<br>p < 0.001            |
| Seizures (N (%))                                                                                           | 10 / 1977 (0.5%)<br>p = 0.20               | 31 / 3452 (0.9 %)                                | 0 / 80 (0.0 %)<br>p = 0.20                |
| FiO2 (median fraction (IQR))                                                                               | N = 1159<br>0.36 (0.28-0.50)<br>p = 0.05   | N = 2084<br>0.36 (0.28 – 0.50)                   | N = 67<br>0.44 (0.30 – 0.80)<br>p = 0.05  |
| SBP (mean SBP in mmHg (SD))                                                                                | N = 2648<br>132 (± 22)<br>p < 0.001        | N = 4971<br>135 (±23)                            | N = 120<br>135 (± 25)<br>p = 1.00         |
| HR (mean HR in BPM (SD))                                                                                   | N = 2661<br>92 (±18)<br>p = 0.003          | N = 4965<br>91 (±20)                             | N = 123<br>95 (±25)<br>p = 0.034          |
| Capillary refill ≥3 s (N (%))                                                                              | 81 / 863 (9.4 %)                           | 93 / 1369 (6.8 %)                                | 6 / 33 (18.2 %)<br>p = 0.008              |
| Blood urea level (median level n mmol/L (IQR))                                                             | N = 2549<br>6.3 (4.5 – 9.3)<br>p = 0.87    | N = 4776<br>6.2 (4.5 – 9.2)                      | N = 115<br>12.6 (7.9 – 25.3)<br>p < 0.000 |
| eGFR rate using 2021 CKD-epi creatinine equation in (median clearance in ml/min/1.73 m <sup>3</sup> (IQR)) | N = 2656<br>64 (45 – 90)<br>p < 0.001      | N = 4983<br>68 (46 – 94)                         | N = 125<br>41 (24 – 71)<br>p < 0.001      |
| CT-severity score (mean score (SD))                                                                        | N = 909<br>12.4 (±5.5)<br>p = 0.58         | N = 1401<br>12.1 (±5.6)                          | N = 30<br>14.5 (±7.2)<br>p = 0.06         |
| Blood CRP level (median level in mg/L (IQR))                                                               | N = 2646<br>93.1 (49.0 – 154)<br>p < 0.001 | N = 4939<br>70.8 (28.0 – 131)                    | N = 123<br>75.0 (29.0 – 148)<br>P = 1.00  |
| Blood LDH level (median level in U/L (IQR))                                                                | N = 2238<br>349 (268 – 471)<br>p < 0.001   | N = 4226<br>323 (247 – 426)                      | N = 89<br>363 (255 – 447)<br>p = 0.52     |

|                            |                                                    |                             |                                                   |
|----------------------------|----------------------------------------------------|-----------------------------|---------------------------------------------------|
| MEWS (median score (IQR))  | N = 2337<br>3.0 (2.0 – 4.0)<br><b>p &lt; 0.001</b> | N = 4055<br>3.0 (2.0 – 4.0) | N = 103<br>4.0 (2.0 – 5.0)<br><b>p &lt; 0.001</b> |
| qSOFA (median score (IQR)) | N = 2373<br>1.0 (0.0 – 1.0)<br>p = 1.00            | N = 4131<br>1.0 (0.0 – 1.0) | N = 104<br>1.0 (1.0 – 1.0)<br><b>p &lt; 0.001</b> |

SBP = systolic blood pressure; HR = heart rate; eGFR = estimated glomerular filtration rate; CKD-epi = chronic kidney disease Epidemiology Collaboration; CT = computed tomography; BPM = beats per minute; IQR = interquartile range; SD = standard deviation; CRP = c-reactive protein; LDH = lactate dehydrogenase; MEWS = modified early warning score; qSOFA = quick sequential organ failure assessment. % = percentage of patients in this group with indicated characteristic. Significance was assessed using a Kruskal-Wallis test with post-hoc correction (for numerical data) or Chi-square test (for categorical data). p – values for all groups indicate significance when compared to the normonatremia group. When no p – value was provided there was no significant difference to the normonatremia group. Subgroup analyses for hyponatremia is provided in the supplemental information.

**Table 3** – Comparison of clinical outcomes between COVID-19 patients with hypo-, normo-, and hypernatremia

| Outcome                                                                          | Hyponatremia<br>Na 134 mmol/L<br>N = 2677                               | Normonatremia<br>Na 136 – 145 mmol/L<br>N = 5008 | Hypernatremia<br>Na 146 mmol/L<br>N = 126                            |
|----------------------------------------------------------------------------------|-------------------------------------------------------------------------|--------------------------------------------------|----------------------------------------------------------------------|
| Duration of admission (median days (IQR))                                        | N = 2372<br>7 (4 – 16)<br>p < 0.001                                     | N = 4116<br>7 (3 – 14)                           | N = 103<br>8 (4 – 15)<br>P = 0.998                                   |
| Death or palliative discharge (N (%))                                            | 405 / 2360 (17.2 %)<br><sup>A</sup> OR 1.04 (0.91 – 1.20)<br>p = 0.56   | 729 / 4568 (16.0 %)                              | 42 / 119 (35.3 %)<br><sup>A</sup> OR 2.25 (1.49 – 3.41)<br>p < 0.001 |
| ICU-admission (N (%)),<br>'do not intubate' excluded                             | 439 / 1923 (22.8 %)<br><sup>A</sup> OR 1.27 (1.11 – 1.46)<br>p < 0.001  | 710 / 3778 (18.8 %)                              | 32 / 80 (40.0%)<br><sup>A</sup> OR 2.89 (1.83 – 4.58)<br>p < 0.001   |
| Duration of ICU-admission (days (IQR))<br>'do not intubate' excluded             | N = 299<br>8 (3 - 19)<br>p = 0.356                                      | N = 437<br>10 (4 – 19)                           | N = 25<br>11 (3.5 – 19)<br>p = 0.356                                 |
| Invasive ventilation (N (%)),<br>'do not intubate' excluded                      | 352 / 1889 (18.6 %)<br><sup>A</sup> OR 1.12 (0.97 – 1.30)<br>p = 0.121  | 623 / 3706 (16.8 %)                              | 29 / 77 (37.7 %)<br><sup>A</sup> OR 2.95 (1.83 – 4.74)<br>p < 0.001  |
| Discharge alive within 42 days; N indicating<br>the number of non-censored cases | N = 1527<br><sup>A</sup> HR 0.96 (0.90 – 1.02)<br>p = 0.15              | N = 2747                                         | N = 52<br><sup>A</sup> HR 0.78 (0.59 – 1.03)<br>p = 0.08             |
| Use of tocilizumab, sarilumab, or anakinra<br>(N (%))                            | 134 / 688 (19.5%)<br><sup>A</sup> OR 1.256 (0.984 – 1.604)<br>p = 0.068 | 199 / 1245 (16.0%)                               | 3 / 34 (8.8%)<br><sup>A</sup> OR 0.550 (0.165 – 1.830)<br>p = 0.330  |
| <b>Complications</b>                                                             | Na 134 mmol/L<br>N = 1821                                               | Na 136 – 145 mmol/L<br>N = 3206                  | Na 146 mmol/L<br>N = 82                                              |
| Bacterial pneumonia (N (%))                                                      | 289 / 2212 (13.1 %)<br><sup>A</sup> OR 1.12 (0.96 – 1.31)<br>p = 0.14   | 501 / 4307 (11.6 %)                              | 18 / 109 (16.5 %)<br><sup>A</sup> OR 1.44 (0.85 – 2.40)<br>p = 0.17  |



1  
2  
3  
4  
5  
6  
7  
8  
9  
10  
11  
12  
13  
14  
15  
16  
17  
18  
19  
20  
21  
22  
23  
24  
25  
26  
27  
28  
29  
30  
31  
32  
33  
34  
35  
36  
37  
38  
39  
40  
41  
42  
43  
44  
45  
46

|                                      |                                                             |                     |                                                           |
|--------------------------------------|-------------------------------------------------------------|---------------------|-----------------------------------------------------------|
| Aspergillosis pneumonia (N (%))      | 67 / 1915 (3.5 %)<br>^AOR 1.44 (1.03 – 1.99)<br>p = 0.031   | 83 / 3442 (2.4 %)   | 5 / 90 (5.6 %)<br>^AOR 2.26 (0.89 – 5.74)<br>p = 0.084    |
| ARDS (N (%))                         | 224 / 2223 (10.1 %)<br>^AOR 1.08 (0.91 – 1.29)<br>p = 0.377 | 404 / 4323 (9.3 %)  | 17 / 110 (15.5 %)<br>^AOR 1.78 (1.05– 3.04)<br>p = 0.033  |
| Treatment for septic shock (N (%)) * | 94 / 2153 (4.4 %)<br>^AOR 1.33 (1.01 – 1.74)<br>p = 0.04    | 135 / 4175 (3.2 %)  | 12 / 109 (11.0 %)<br>^AOR 3.37 (1.80 – 6.33)<br>p < 0.001 |
| Congestive heart failure (N (%))     | 64 / 2235 (2.9 %)<br>^AOR 0.95 (0.70 – 1.29)<br>p = 0.73    | 125 / 4352 (2.9 %)  | 2 / 111 (1.8 %)<br>^AOR 0.48 (0.12 – 1.96)<br>p = 0.31    |
| Physical decline (N (%))             | 576 / 2116 (27.2 %)<br>^AOR 1.22 (1.08 – 1.38)<br>p < 0.001 | 950 / 4126 (23.0 %) | 30 / 106 (28.3 %)<br>^AOR 1.18 (0.77 – 1.82)<br>p = 0.44  |
| Delirium (N (%))                     | 237 / 2136 (11.1 %)<br>^AOR 0.99 (0.83 - 1.17)<br>p = 0.88  | 451 / 4146 (10.5 %) | 27 / 107 (25.7 %)<br>^AOR 2.25 (1.42 – 3.56)<br>p < 0.001 |

ICU = Intensive care unit; ARDS = acute respiratory distress syndrome. ^AOR = adjusted odds ratio; odds ratio adjusted for sex assigned at birth, age, a history of chronic kidney disease, and a history of hypertension. ^AHR = adjusted hazard ratio; hazard ratio adjusted for sex assigned at birth, age, a history of chronic kidney disease, and a history of hypertension \* Treatment for septic shock was defined as the need for vasopressors in order to maintain mean arterial blood pressure >65 mmHg and blood lactate level >2 mmol/L, in the absence of other causes including hypovolemia. Significance was assessed using a cox proportional-hazard model at the mean of the covariates (discharge alive) or logistic regression (all other values). p – values for all groups indicate significance when compared to the normonatremia group.

**Corresponding author:**

Lianne R. de Haan

[Lr.de.haan@nwz.nl](mailto:Lr.de.haan@nwz.nl)

Hospitaalweg 1

1315 RA Almere

The Netherlands

**Alternative proofreader:**

Renée A. Douma

[rdouma@flevoziekenhuis.nl](mailto:rdouma@flevoziekenhuis.nl)

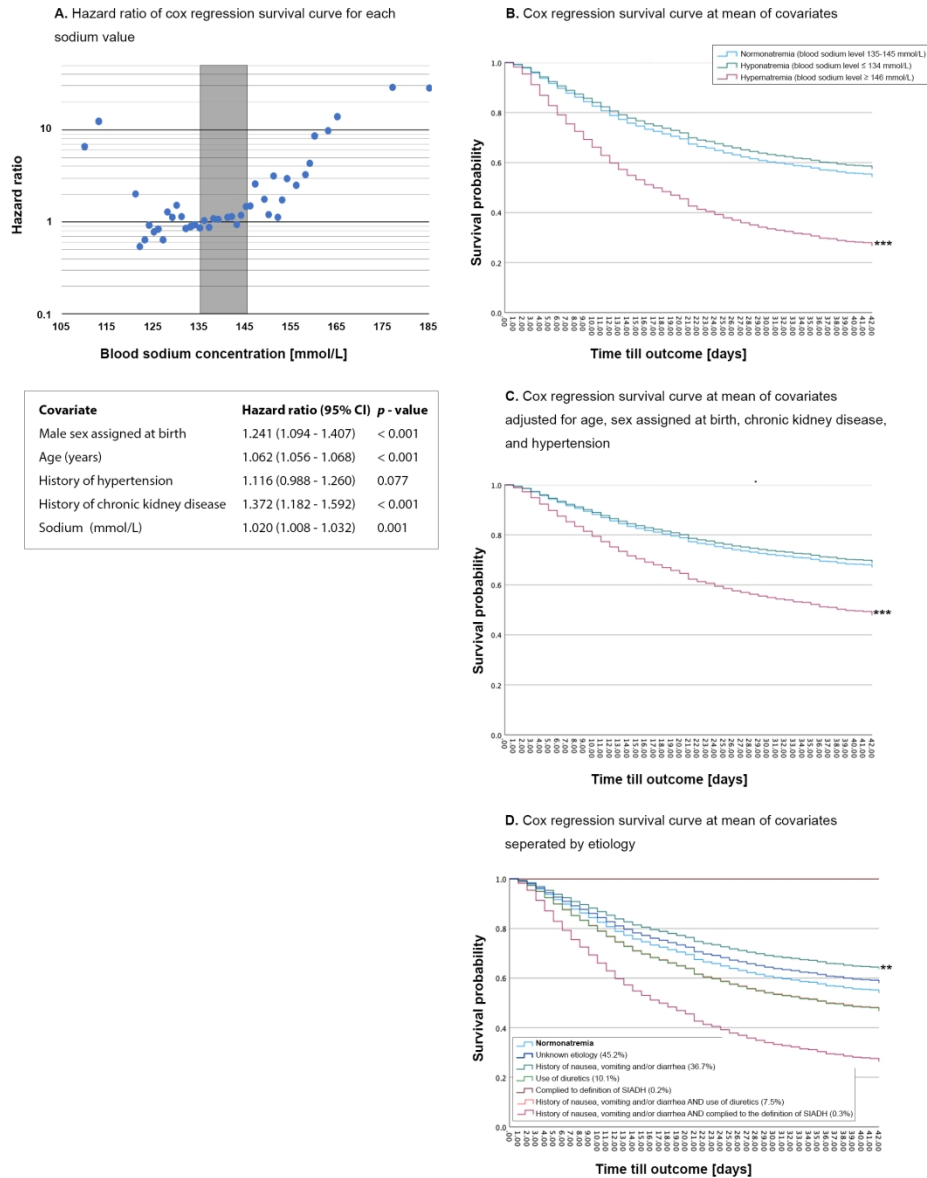

Figure 1. Hazard ratios of cox proportional survival curves for survival probability for each sodium value adjusted for age, sex assigned at birth, a history of chronic kidney disease, and a history of hypertension. The grey area indicates the normonatremia. Table shows hazard ratios for covariates and sodium as a continuous variable (A). Cox proportional survival curves at the mean of covariates for (B) unadjusted 6-week mortality stratified by normo-, hypo-, and hypernatremia, (C) 6-week mortality adjusted for age, sex assigned at birth, a history of chronic kidney disease, and a history of hypertension stratified in normo-, hypo-, and hypernatremia, (D) Unadjusted 6-week mortality stratified by etiology. \*\* indicates a p-value <0.01, \*\*\* indicates a p-value <0.001

172x215mm (300 x 300 DPI)

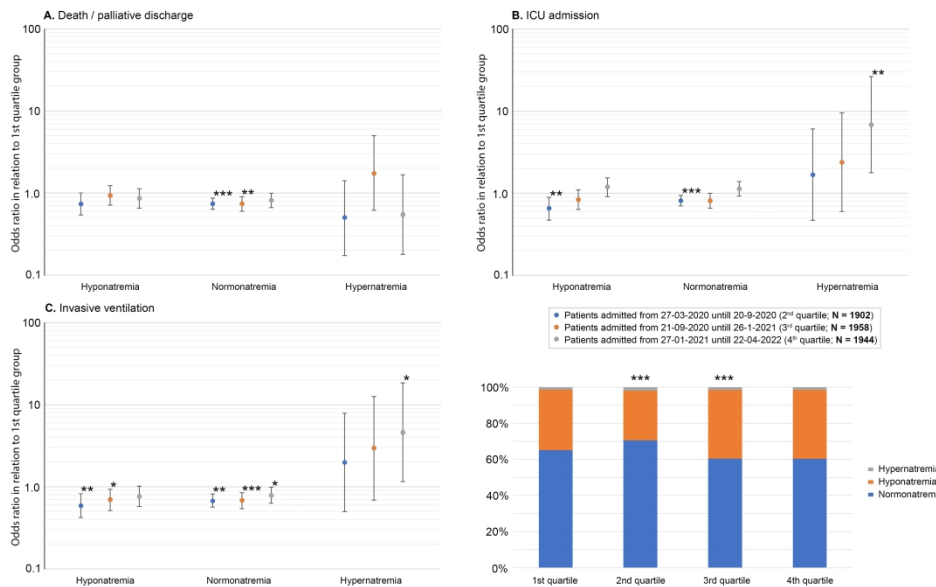

Figure 2. Odds ratio for adverse outcomes (death / palliative discharge (A), intensive care unit admission (B) invasive ventilation (C)) in each quartile compared to patients in the first quartile (admitted before 27-03-2020; N = 2002) for patients with hypo-, hyper-, or normonatremia at admission. \* Indicates a p-value <0.05, \*\* indicates a p-value < 0.01, \*\*\* indicates a p-value <0.001 for the odds ratio as calculated by binary logistic regression. (D) incidence of hypo-, normo-, and hypernatremia in each quartile, \*\*\* indicates a p-value <0.001 as compared to the first quartile for the chi-square statistic with Bonferroni post-hoc correction.

375x227mm (300 x 300 DPI)

# Outcomes of COVID-19 patients presenting with dysnatremia: an observational study

## Supplemental information

L.R. de Haan<sup>a, f1, \*</sup>, M. ten Wolde<sup>a</sup>, M. Beudel<sup>b</sup>, R.H. Olde Engberink<sup>c</sup>, B. Appelman<sup>c</sup>, E.K. Haspels-Hogervorst<sup>d</sup>, D. Rusch<sup>d</sup>, N.C. Gritters-van den Oever<sup>e</sup>, S. Simsek<sup>f1</sup>, N. Paternotte<sup>f2</sup>, J.P. van den Bergh<sup>g</sup>, C.E. Wyers<sup>g</sup>, M. de Kruijff<sup>h1</sup>, T. Dormans<sup>h2</sup>, H. Moeniralam<sup>i</sup>, N. Bokhizzoui<sup>j</sup>, K. Brinkman<sup>k</sup>, R.A. Douma<sup>a</sup>, on behalf on The Dutch COVID-PREDICT study group

<sup>a</sup> Department of Internal Medicine, Flevo Hospital, Almere, the Netherlands

<sup>b</sup> Department of Neurology, Amsterdam University Medical Centre

<sup>c</sup> Center of Experimental and Molecular Medicine (C.E.M.M.), Location Academic Medical Center, Amsterdam UMC, Amsterdam, The Netherlands.

<sup>d</sup> Intensive care department, Martini Hospital, Groningen, the Netherlands

<sup>e</sup> Intensive care department, Treant Hospitals, Hoogeveen, Emmen, and Stadskanaal, the Netherlands

<sup>f1</sup> Department of Internal Medicine, Northwest Clinics, Alkmaar, the Netherlands

<sup>f2</sup> Department of Pulmonary diseases, Northwest Clinics, Alkmaar, the Netherlands

<sup>g</sup> Department of Internal Medicine, VieCuri Medical Centre, Venlo, the Netherlands

<sup>h1</sup> Department of Pulmonary diseases, Zuyderland Medical Centre, Heerlen, the Netherlands

<sup>h2</sup> Department of Intensive Care, Zuyderland Medical Centre, Heerlen, the Netherlands

<sup>i</sup> Department of Internal Medicine, St. Antonius Hospital, Nieuwegein, the Netherlands

<sup>j</sup> Department of Internal Medicine, BovenIJ hospital, Amsterdam, the Netherlands

<sup>k</sup> Department of Internal Medicine, Onze Lieve Vrouwe Gasthuis, Amsterdam, the Netherlands

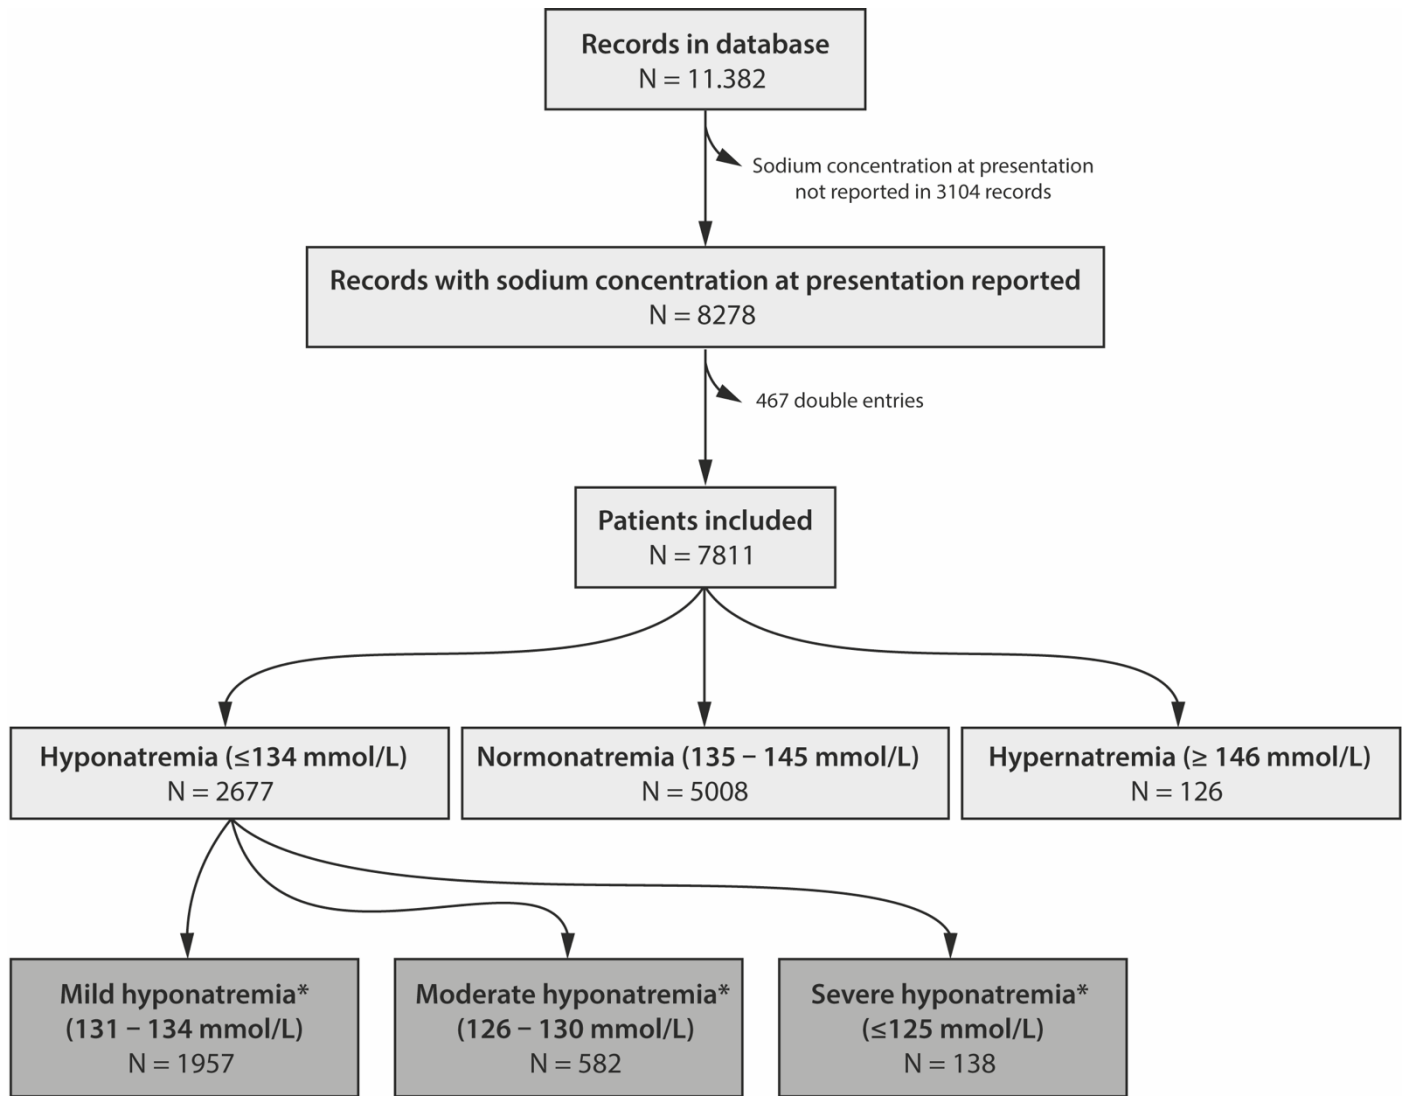

**Supplemental Figure 1.** Flow chart of included patients. Sodium concentrations indicate corrected serum sodium concentrations at hospital presentation \* indicates the subgroup analysis as provided in the supplemental information.

**Supplemental Table 1** – Subgroup analysis of patient characteristics

|                                             | Na 135 – 145 mmol/L<br>N = 5008    | Na ≤134 mmol/L<br>N = 2677          | Na 131 – 134 mmol/L<br>N = 1957     | Na 126 – 130 mmol/L<br>N = 582    | Na ≤125 mmol/L<br>N = 138         |
|---------------------------------------------|------------------------------------|-------------------------------------|-------------------------------------|-----------------------------------|-----------------------------------|
| Sex assigned at birth (N (%))               | ♂ 2946 (58.8 %)<br>♀ 2060 (41.2 %) | ♂ 1673 (62.5%) **<br>♀ 1003 (37.5%) | ♂ 1249 (63.9%) ***<br>♀ 707 (36.1%) | ♂ 363 (62.4%)<br>♀ 219 (37.6%)    | ♂ 61 (44.2%) ***<br>♀ 77 (55.8%)  |
| Age (median age in years (IQR))             | N = 5008<br>66.1 (55.0-76.0)       | N = 2675<br>67.0 (58.0-77.0) **     | N = 1956<br>67.0 (57.0 – 76.0)      | N = 581<br>68.1 (60.0 – 78.0) *** | N = 138<br>70.6 (62.0 – 79.3) *** |
| BMI (median BMI in kg/m <sup>2</sup> (IQR)) | N = 3374<br>27.7 (24.6 – 31.6)     | N = 1740<br>27.2 (24.2 – 31.1) **   | N = 1271<br>27.4 (24.4 – 31.5)      | N = 379<br>26.3 (23.4 – 30.3) *** | N = 90<br>26.9 (23.7 – 30.9)      |
| Order 'Do not intubate' (N (%))             | 796 / 2469 (32.2 %)                | 440 / 1442 (30.5 %)                 | 304 / 1043 (29.1 %)                 | 108 / 322 (33.5 %)                | 28 / 77 (36.4 %)                  |
| Chronic cardiac disease (N (%))             | 1334 / 4982 (26.8 %)               | 760 / 2666 (28.5%)                  | 541 / 1948 (27.8 %)                 | 187 / 581 (32.2 %)                | 32 / 137 (23.4 %)                 |
| Hypertension (N (%))                        | 1889 / 4586 (41.2 %)               | <b>1055 / 2374 (44.4 %) **</b>      | 749 / 1735 (43.2 %)                 | 240 / 520 (46.2 %)                | <b>66 / 119 (55.5 %) **</b>       |
| Chronic pulmonary disease (N (%))           | 844 / 4979 (17.0 %)                | 466 / 2662 (17.5 %)                 | 328 / 1945 (16.9 %)                 | 111 / 580 (19.1 %)                | 27 / 137 (19.7 %)                 |
| Chronic kidney disease (N (%))              | 491 / 4587 (10.7 %)                | 329 / 2379 (13.8 %) ***             | 220 / 1738 (12.7 %)                 | 92 / 522 (17.6 %) ***             | 17 / 119 (14.3 %)                 |
| Moderate to severe liver disease (N (%))    | 50 / 4972 (1.0 %)                  | 30 / 2662 (1.1%)                    | 25 / 1947 (1.3%)                    | 3 / 579 (0.5 %)                   | 2 / 136 (1.5%)                    |
| Diabetes (N (%))                            | 1261 / 4972 (25.4 %)               | 664 / 2662 (24.9 %)                 | 481 / 1946 (24.7 %)                 | 148 / 579 (25.6 %)                | 35 / 137 (25.5 %)                 |
| Immunosuppressives (N (%))                  | 295 / 4445 (6.6 %)                 | 192 / 2283 (8.4 %) **               | 129 / 1669 (7.7 %)                  | 56 / 497 (11.3 %) **              | 7 / 117 (6.0 %)                   |
| Thiazide diuretics (N (%))                  | 394 / 4994 (7.9 %)                 | 258 / 2671 (9.7 %) **               | 186 / 1953 (9.5 %)                  | 55 / 580 (9.5 %)                  | 17 / 138 (12.3 %)                 |
| Loop diuretics (N (%))                      | 389 / 4994 (7.8 %)                 | 187 / 2671 (7.0 %)                  | 128 / 1953 (6.6 %)                  | 50 / 580 (8.6 %)                  | 9 / 138 (6.5 %)                   |
| SSRIs (N (%))                               | 164 / 4994 (3.3 %)                 | 78 / 2671 (2.9 %)                   | 53 / 1953 (2.7%)                    | 15 / 580 (2.6%)                   | 10 / 138 (7.2 %)                  |

BMI = body mass index; IQR = interquartile range; % = percentage of patients in this group with indicated characteristic; SSRI = Selective Serotonin Reuptake inhibitor. SNRI = Selective Serotonin and Noradrenalin Reuptake inhibitor. Significance was assessed using a Kruskal-Wallis test with post-hoc correction (for numerical data; non-normally distributed) or Chi-square test (for categorical data). p – values for all groups indicate the adjusted significance after post-hoc correction when compared to the normonatremia group. \* Indicates a p-value <0.05, \*\* indicates a p-value <0.01, \*\*\* indicates a p-value <0.001

1  
2  
3  
4  
5  
6  
7  
8  
9  
10  
11  
12  
13  
14  
15  
16  
17  
18  
19  
20  
21  
22  
23  
24  
25  
26  
27  
28  
29  
30  
31  
32  
33  
34  
35  
36  
37  
38  
39  
40  
41  
42  
43  
44  
45  
46

For peer review only



**Supplemental Table 2 – Definitions for comorbidities**

| Comorbidity                      | Included diseases                                                                                                                                                                                                                                                                                                                                                                                                                                                                                                                                                                                                                                                                                                                                                                                                                                                                                              |
|----------------------------------|----------------------------------------------------------------------------------------------------------------------------------------------------------------------------------------------------------------------------------------------------------------------------------------------------------------------------------------------------------------------------------------------------------------------------------------------------------------------------------------------------------------------------------------------------------------------------------------------------------------------------------------------------------------------------------------------------------------------------------------------------------------------------------------------------------------------------------------------------------------------------------------------------------------|
| Chronic pulmonary disease        | Alpha-1 trypsin deficiency; asbestosis; cryptogenic organizing pneumonia; lymphangioleiomyomatosis; lung disease immuno-deficiency and chromosome breakage syndrome; bronchopulmonary dysplasia; primary ciliary dyskinesia; bronchiectasis; cystic fibrosis; chronic bronchitis or emphysema; lung fibrosis; sarcoidosis; obstructive sleep apnea; pulmonary hypertension                                                                                                                                                                                                                                                                                                                                                                                                                                                                                                                                     |
| Chronic cardiac disease          | <b>Chronical heart disease:</b> Myocardial infarction; Cardiac arrhythmias (AVNRT, atrial fibrillation, (supra)ventricular tachycardia, ventricular tachycardia, brugada syndrome, sick sinus syndrome, wolf parkinson white syndrome; decompensated heart failure, cardiomyopathy; valve disease (aortic valve stenosis, aortic valve insufficiency<br><b>Congenital heart disease:</b> aortic valve insufficiency or aortic valve stenosis; Atrial septal defect or ventricular septal defect; hypoplastic left heart syndrome; Ebstein's anomaly; patent ductus arteriosus; tetralogy of Fallot; transposition of the great vessels                                                                                                                                                                                                                                                                         |
| Chronic kidney disease           | Acute tubulointerstitial nephritis; hemolytic uremic syndrome (HUS); amyloidosis; Anti-glomerular basement membrane disease; bartter syndrome; kidney damage due to medication, chronic bladder infections / kidney infections / diabetes, high blood pressure, arteriosclerosis; cryoglobulinemia, renal cystic disease; cystinosis; dense deposit disease (DDD); Focal segmental glomerulosclerosis (FSGS); Gitelman syndrome; glomerulonephritis; HNF1beta associated kidney disease; renal fusion (horseshoe kidney); IgA nephropathy; medullary sponge kidney; membranous nephropathy; minimal change disease; solitary kidney; Nail-patella syndrome (NPS); nephrogenic diabetes insipidus; nephroptosis; nephrotic syndrome; renal angioliopoma; renal cell carcinoma; primary hyperoxaluria; reflux nephropathy; atrophic kidney; scleroderma; lupus nephritis; Alport's syndrome; systemic vasculitis |
| Moderate to severe liver disease | Liver disease that caused cirrhosis (e.g. Budd Chiari, hemochromatosis, hepatitis, Wilson's disease)                                                                                                                                                                                                                                                                                                                                                                                                                                                                                                                                                                                                                                                                                                                                                                                                           |

**Supplemental Table 3 – Subgroup analysis of signs and symptoms**

| Signs and symptoms                                                                                         | Na 135 – 145 mmol/L<br>N = 3206 | Na ≤134 mmol/L<br>N = 1821        | Na 131 – 134 mmol/L<br>N = 1346   | Na 126 – 130 mmol/L<br>N = 383  | Na ≤125 mmol/L<br>N = 92     |
|------------------------------------------------------------------------------------------------------------|---------------------------------|-----------------------------------|-----------------------------------|---------------------------------|------------------------------|
| Nausea / vomiting (N (%))                                                                                  | 1150 / 4129 (27.9 %)            | 679 / 2273 (29.9 %)               | 490 / 1663 (29.5 %)               | 151 / 499 (30.3 %)              | 38 / 111 (34.2%)             |
| Diarrhea (N (%))                                                                                           | 1146 / 4157 (27.6 %)            | 804 / 2298 (35.0%) ***            | 574 / 1686 (34.0 %) ***           | 180 / 501 (35.9%) ***           | 50 / 111 (45.0 %) ***        |
| Anosmia (N (%))                                                                                            | 352 / 3330 (10.6 %)             | 244 / 1904 (12.8 %) **            | 174 / 1395 (12.5 %)               | 62 / 420 (14.8 %)               | 8 / 89 (9.0 %)               |
| Confusion (N (%))                                                                                          | 651 / 4381 (14.9 %)             | 311 / 2319 (13.4%)                | 207 / 1688 (12.3 %)               | 78 / 511 (15.3 %)               | 26 / 120 (21.7 %)            |
| Seizures (N (%))                                                                                           | 31 / 3452 (0.9 %)               | 10 / 1977 (0.5%)                  | 6 / 1448 (0.4 %)                  | 2 / 434 (0.5 %)                 | 2 / 95 (2.1 %)               |
| FiO2 (median fraction (IQR))                                                                               | N = 2084<br>0.36 (0.28 – 0.50)  | N = 1159<br>0.36 (0.28 – 0.50)    | N = 848<br>0.36 (0.28 – 0.48)     | N = 258<br>0.36 (0.32 – 0.60)   | N = 53<br>0.36 (0.31 – 0.75) |
| SBP (mean SBP in mmHg (SD))                                                                                | N = 2648<br>132 (± 22)          | N = 4971<br>135 (±23) ***         | N = 1934<br>132 (±22) ***         | N = 578<br>132 (±22) **         | N = 136<br>138 (±27)         |
| HR (mean HR in BPM (SD))                                                                                   | N = 4965<br>91 (±20)            | N = 2661<br>92 (±18) **           | N = 1946<br>92 (±18) *            | N = 580<br>92 (±18)             | N = 135<br>90 (±19)          |
| Disturbed capillary refill (N (%))                                                                         | 93 / 1369 (6.8 %)               | 81 / 863 (9.4 %)                  | 51 / 614 (8.3 %)                  | 27 / 206 (13.1 %)               | 3 / 43 (7.0 %)               |
| Blood urea level (median level n mmol/L (IQR))                                                             | N = 4776<br>6.2 (4.5 – 9.2)     | N = 2549<br>6.3 (4.5 – 9.3)       | N = 1892<br>6.3 (4.6 – 9.1)       | N = 559<br>6.2 (4.5 – 10.2)     | N = 128<br>5.5 (4.2 – 9.8)   |
| eGFR rate using 2021 CKD-epi creatinine equation in (median clearance in ml/min/1.73 m <sup>3</sup> (IQR)) | N = 4983<br>68 (46 – 94)        | N = 2656<br>64 (45 – 90) ***      | N = 1944<br>64 (46 – 89) ***      | N = 575<br>63 (41 – 90) ***     | N = 137<br>79 (46 – 92)      |
| CT-severity score (mean score (SD))                                                                        | N = 1401<br>12.1 (±5.6)         | N = 909<br>12.4 (±5.5)            | N = 684<br>12.3 (±5.4)            | N = 190<br>12.6 (±5.4)          | N = 35<br>12.5 (±6.7)        |
| Blood CRP level (median level in mg/L (IQR))                                                               | N = 4939<br>70.8 (28.0 – 131)   | N = 2646<br>93.1 (49.0 – 154) *** | N = 1933<br>93.0 (48.2 – 151) *** | N = 577<br>103 (54.6 – 166) *** | N = 136<br>82.5 (36.0 – 145) |
| Blood LDH level (median level in U/L (IQR))                                                                | N = 4226<br>323 (247 – 426)     | N = 2238<br>349 (268 – 471) ***   | N = 1651<br>346 (269 – 467) ***   | N = 479<br>361 (269 – 482) ***  | N = 108<br>331 (240 – 543)   |
| Modified early warning score (MEWS) (median score (IQR))                                                   | N = 4055<br>3.0 (2.0 – 4.0)     | N = 2337<br>3.0 (2.0 – 4.0) ***   | N = 1709<br>3.0 (2.0 – 4.0) ***   | N = 509<br>3.0 (2.0 – 4.0)      | N = 119<br>3.0 (2.0 – 4.0)   |
| Quick sequential organ failure assessment (median score (IQR))                                             | N = 4131<br>1.0 (0.0 – 1.0)     | N = 2373<br>1.0 (0.0 – 1.0)       | N = 1735<br>1.0 (0.0 – 1.0)       | N = 517<br>1.0 (0.0 – 1.0)      | N = 121<br>1.0 (0.0 – 1.0)   |

SBP = systolic blood pressure; HR = heart rate; CKD-epi = chronic kidney disease Epidemiology Collaboration BPM = beats per minute; IQR = interquartile range; SD = standard deviation; CRP = c-reactive protein; LDH = lactate dehydrogenase; % = percentage of patients in this group with indicated characteristic. Significance was assessed using a Kruskal wallis test with post-hoc correction (for numerical data) or Chi-square test (for categorical data). \* Indicates a p-value <0.05, \*\* indicates a p-value <0.01, \*\*\* indicates a p-value <0.001

A. Cox regression survival curve at mean of covariates

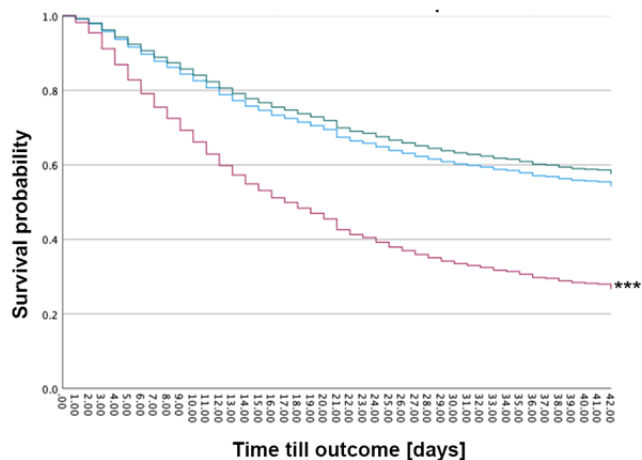

B. Cox regression survival curve at mean of covariates

corrected for age, sex assigned at birth, chronic kidney disease, and hypertension

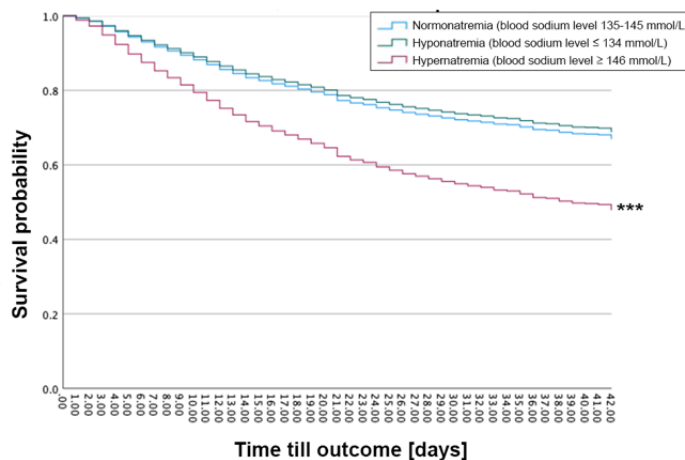

C. Cox regression survival curve at mean of covariates

categorized by severity groups

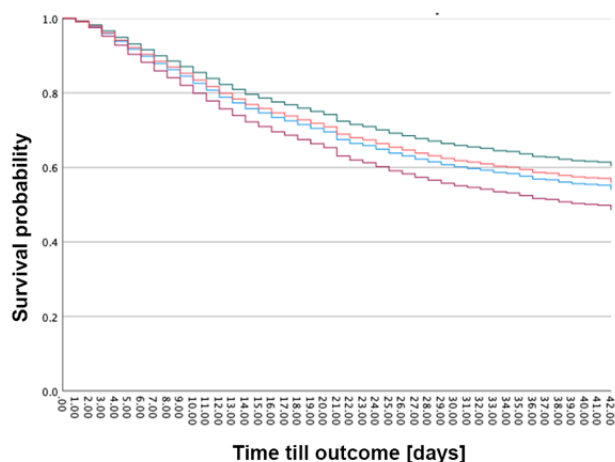

D. Cox regression survival curve at mean of covariates

corrected for age, sex assigned at birth, chronic kidney disease, and hypertension, categorized by severity groups

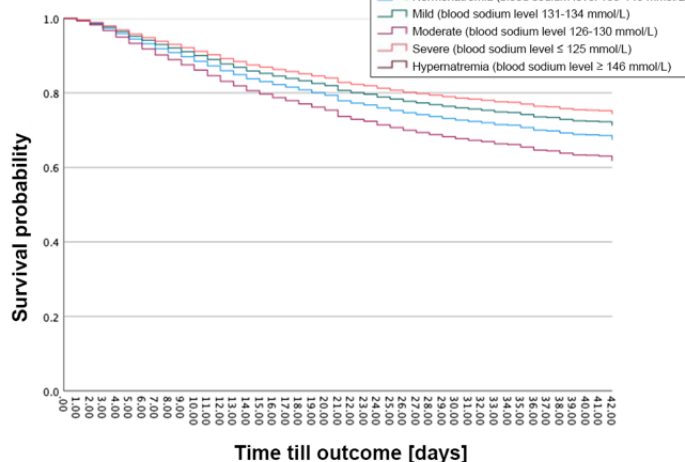

**Supplemental Figure 2.** Cox proportional survival curves at the mean of covariates for (A) unadjusted 6-week mortality categorized by normo-, hypo-, and hypernatremia, (B) 6-week mortality adjusted for age, sex assigned at birth, a history of chronic kidney disease, and a history of hypertension stratified in normo-, hypo-, and hypernatremia, (C) unadjusted 6-week mortality stratified in normo- and hypernatremia and mild, moderate, and severe hyponatremia, and (D) 6-week mortality adjusted for age, sex assigned at birth, a history of chronic kidney disease, and a history of hypertension stratified in normo- and hypernatremia and mild, moderate, and severe hyponatremia. \* Indicates a p-value  $<0.05$ , \*\*\* indicates a p-value  $<0.001$

**Supplemental Table 4** – Subgroup analysis of outcome and complications

| Outcome                                                                       | Na 135 – 145 mmol/L<br>N = 3206 | Na ≤134 mmol/L<br>N = 1821                                              | Na 131 – 134 mmol/L<br>N = 1346                                | Na 126 – 130 mmol/L<br>N = 383                                 | Na ≤125 mmol/L<br>N = 92                                   |
|-------------------------------------------------------------------------------|---------------------------------|-------------------------------------------------------------------------|----------------------------------------------------------------|----------------------------------------------------------------|------------------------------------------------------------|
| Duration of admission (median days (IQR))                                     | N = 4116<br>7 (3 – 14)          | N = 2372<br>7 (4 – 16) ***                                              | N = 1735<br>7 (4 – 15) **                                      | N = 514<br>8 (4 – 18)*                                         | N123<br>8 (3 – 18)                                         |
| Death or palliative discharge (N (%))                                         | 729 / 4568 (16.0 %)             | 405 / 2360 (17.2 %)<br><sup>A</sup> OR 1.042 (0.906 – 1.200)            | 269 / 1723 (15.6 %)                                            | 115 / 518 (22.2 %)                                             | 21 / 119 (17.6 %)                                          |
| ICU-admission (N (%), 'do not intubate' excluded)                             | 710 / 3778 (18.8 %)             | 439 / 1923 (22.8 %)<br><sup>A</sup> OR 1.274 (1.112 – 1.458)***         | 314 / 1422 (22.1 %)<br><sup>A</sup> OR 1.205 (1.036 – 1.401)*  | 104 / 410 (25.4 %)<br><sup>A</sup> OR 1.487 (1.170 – 1.889)*** | 21 / 91 (23.1 %)<br><sup>A</sup> OR 1.431 (0.868 – 2.360)  |
| Duration of ICU-admission (days (IQR))<br>'do not intubate' excluded          | N = 437<br>10 (4 – 19)          | N = 299<br>8 (3 – 19)<br>p = 0.356                                      | N = 215<br>8 (3 – 20)                                          | N = 68<br>8 (4 – 18)                                           | N = 16<br>9 (4 – 21)                                       |
| Invasive ventilation (N (%)),<br>'do not intubate' excluded                   | 623 / 3706 (16.8 %)             | 352 / 1889 (18.6 %)<br><sup>A</sup> OR 1.122 (0.970 – 1.298)            | 250 / 1396 (17.9 %)                                            | 85 / 402 (21.1 %)                                              | 17 / 91 (18.7 %)                                           |
| Discharge alive within 42 days; N indicating the number of non-censored cases | N = 2747                        | N = 1527<br><sup>A</sup> HR 0.955 (0.897 – 1.017)<br>p = 0.154          | N = 1153                                                       | N = 302                                                        | N = 72                                                     |
| Use of tocilizumab, sarilumab, or anakinra (N (%))                            | 199 / 1245 (16.0%)              | 134 / 688 (19.5%)<br><sup>A</sup> OR 1.256 (0.984 – 1.604)<br>p = 0.068 | 91 / 480 (19.0 %)                                              | 36 / 169 (21.3 %)                                              | 7 / 39 (17.9%)                                             |
| Complications                                                                 | Na 135 – 145 mmol/L<br>N = 3206 | Na ≤134 mmol/L<br>N = 1821                                              | Na 131 – 134 mmol/L<br>N = 1346                                | Na 126 – 130 mmol/L<br>N = 383                                 | Na ≤125 mmol/L<br>N = 92                                   |
| Bacterial pneumonia (N (%))                                                   | 501 / 4307 (11.6 %)             | 289 / 2212 (13.1 %)<br><sup>A</sup> OR 1.123 (0.962 – 1.312)            | 207 / 1619 (12.8 %)                                            | 72 / 483 (14.9 %)                                              | 10 / 110 (9.1 %)                                           |
| Aspergillosis pneumonia (N (%))                                               | 83 / 3456 (2.4 %)               | 67 / 1915 (3.5 %)<br><sup>A</sup> OR 1.436 (1.034 – 1.993)              | 49 / 1402 (3.5 %)<br><sup>A</sup> OR 1.426 (0.995 – 2.044)     | 14 / 417 (3.4 %)<br><sup>A</sup> OR 1.352 (0.759 – 2.410)      | 4 / 96 (4.2 %)<br><sup>A</sup> OR 1.839 (0.657 – 5.148)    |
| ARDS (N (%))                                                                  | 404 / 4323 (9.3 %)              | 224 / 2223 (10.1 %)<br><sup>A</sup> OR 1.081 (0.909 – 1.286)            | 161 / 1627 (9.9 %)                                             | 52 / 486 (10.7 %)                                              | 11 / 110 (10.0 %)                                          |
| Treatment for septic shock (N (%))<br>&                                       | 135 / 4175 (3.2 %)              | 94 / 2153 (4.4 %)<br><sup>A</sup> OR 1.326 (1.013 – 1.737)*             | 66 / 1570 (4.2 %)<br><sup>A</sup> OR 1.274 (0.943 – 1.721)     | 25 / 478 (5.2 %)<br><sup>A</sup> OR 1.570 (1.012 – 2.438)*     | 3 / 105 (2.9%)<br><sup>A</sup> OR 0.920 (0.287 – 2.946)    |
| Congestive heart failure (N (%))                                              | 125 / 4352 (2.9 %)              | 64 / 2235 (2.9 %)<br><sup>A</sup> OR 0.946 (0.696 – 1.287)              | 34 / 1637 (2.1%)                                               | 23 / 488 (4.7 %)                                               | 7 / 110 (6.4 %)                                            |
| Physical decline (N (%))                                                      | 950 / 4126 (23.0 %)             | 576 / 2116 (27.2 %)<br><sup>A</sup> OR 1.221 (1.082 – 1.377)**          | 414 / 1544 (26.8 %)<br><sup>A</sup> OR 1.206 (1.054 – 1.380)** | 136 / 468 (29.1 %)<br><sup>A</sup> OR 1.303 (1.053 – 1.614)*   | 26 / 104 (25.0 %)<br><sup>A</sup> OR 1.059 (0.674 – 1.666) |

|   |                  |                     |                                                              |                     |                   |                   |
|---|------------------|---------------------|--------------------------------------------------------------|---------------------|-------------------|-------------------|
| 1 | Delirium (N (%)) | 451 / 4146 (10.5 %) | 237 / 2136 (11.1 %)<br><sup>A</sup> OR 0.987 (0.833 - 1.170) | 157 / 1557 (10.1 %) | 62 / 474 (13.1 %) | 18 / 105 (17.1 %) |
|---|------------------|---------------------|--------------------------------------------------------------|---------------------|-------------------|-------------------|

2  
3  
4 *ICU = Intensive care unit; ARDS = acute respiratory distress syndrome. OR = odds ratio <sup>A</sup>OR = adjusted odds ratio; odds ratio corrected for sex assigned at birth and age. #Uncorrected for sex assigned at birth and age & Treatment for septic shock was defined as the need for vasopressors in order to maintain mean arterial blood pressure >65 mmHg and blood lactate level >2 mmol/L, in the absence of other causes including hypovolemia. Significance was assessed using a Kruskal wallis test with post-hoc correction (time to discharge alive) or logistic regression (all other values). \* Indicates a p-value <0.05, \*\* indicates a p-value <0.01, \*\*\* indicates a p-value <0.001*

5  
6  
7  
8  
9  
10  
11  
12  
13  
14  
15  
16  
17  
18  
19  
20  
21  
22  
23  
24  
25  
26  
27  
28  
29  
30  
31  
32  
33  
34  
35  
36  
37  
38  
39  
40  
41  
42  
43  
44  
45  
46

For peer review only

**Supplemental Table 5** – Characteristics of patients with the order ‘do not intubate’

|                                                      | Order ‘do not intubate’                        | No order ‘do not intubate’                       | p-value   |
|------------------------------------------------------|------------------------------------------------|--------------------------------------------------|-----------|
| Sex assigned at birth (N (%))                        | ♀ 531 / 1576 (33.7 %)<br>♂ 743 / 2388 (31.1 %) | ♀ 1045 / 1576 (66.3 %)<br>♂ 1645 / 2388 (68.9 %) | p = 0.095 |
| Age (median age in years (IQR))                      | 79 (73 – 84)                                   | 62 (53 -71)                                      | p < 0.001 |
| BMI (median BMI in kg/m <sup>2</sup> (IQR))          | 26.2 (23.1 – 30.1)                             | 27.9 (25.0 – 31.9)                               | p < 0.001 |
| Chronic pulmonary disease (N (%))                    | 361 / 1270 (28.4 %)                            | 359 / 2680 (13.4%)                               | p < 0.001 |
| <i>Asthma (N (%))</i>                                | 95 / 1269 (7.5 %)                              | 256 / 2678 (9.6%)                                | p = 0.036 |
| <i>Chronic obstructive pulmonary disease (N (%))</i> | 125 / 267 (46.8 %)                             | 80 / 293 (27.3 %)                                | p < 0.001 |
| Chronic kidney disease (N (%))                       | 259 / 1270 (20.4 %)                            | 250 / 2681 (9.3%)                                | p < 0.001 |
| Chronic cardiac disease (N (%))                      | 637 / 1266 (50.3 %)                            | 564 / 2683 (21.0%)                               | p < 0.001 |
| Hypertension (N (%))                                 | 755 / 1270 (59.4 %)                            | 1051 / 2685 (39.1 %)                             | p < 0.001 |
| Moderate to severe liver disease (N (%))             | 21 / 1267 (1.7 %)                              | 28 / 2680 (1.0 %)                                | p = 0.123 |
| Diabetes (N (%))                                     | 457 / 1270 (36.0 %)                            | 679 / 2680 (25.3 %)                              | p < 0.001 |
| Neoplasm (N (%))                                     | 156 / 1273 (12.3 %)                            | 130 / 2682 (4.8 %)                               | p < 0.001 |

BMI = Body Mass Index. Significance was assessed using a Mann-Whitney test (for numerical data) or Chi-square test (for categorical data). p – values for all groups indicate the 2-tailed significance between the two groups.

**Supplemental Table 6** – Patient characteristics, signs and symptoms, outcome measures, and complications of patients with hyponatremia ( $\text{Na} \leq 134$  mmol/L) that did not use diuretics stratified based on their urinary sodium excretion.

| Patient characteristics                                                                                    | Urinary sodium excretion < 30 mmol/L | Urinary sodium excretion $\geq$ 30 mmol/L | p - value        |
|------------------------------------------------------------------------------------------------------------|--------------------------------------|-------------------------------------------|------------------|
|                                                                                                            | % or IQR<br>N = 72                   | % or IQR<br>N = 73                        |                  |
| Age (median age in years (IQR))                                                                            | N = 72<br>67 (56 – 74)               | N = 73<br>69 (59 – 76)                    | p = 0.47         |
| Sex assigned at birth (N (%))                                                                              | ♂ 38 (53%)<br>♀ 34 (47%)             | ♂ 43 (59%)<br>♀ 30 (41%)                  | p = 0.51         |
| Vomiting/nausea (N (%))                                                                                    | 32 / 71 (45.1 %)                     | 19 / 67 (28.4 %)                          | p = 0.05         |
| Diarrhea (N (%))                                                                                           | 26 / 67 (38.8 %)                     | 28 / 68 (41.2 %)                          | p = 0.86         |
| Heart rate (mean HR in BPM (SD))                                                                           | N = 71<br>89.7 ( $\pm$ 16.3)         | N = 72<br>93.1 ( $\pm$ 18.9)              | p = 0.20         |
| Systolic blood pressure (mean SBP in mmHg (SD))                                                            | N = 70<br>135 ( $\pm$ 24.8)          | N = 71<br>137 ( $\pm$ 24.1)               | p = 0.87         |
| Disturbed capillary refill (N (%))                                                                         | 3 / 27 (11.1 %)                      | 4 / 31 (12.9 %)                           | p = 1.00         |
| eGFR rate using 2021 CKD-epi creatinine equation in (median clearance in ml/min/1.73 m <sup>3</sup> (IQR)) | N = 71<br>67 (49 – 90)               | N = 73<br>71 (32 – 92)                    | p = 0.49         |
| CRP (median level in mmol/L (IQR))                                                                         | N = 70<br>111 (52.5 – 163)           | N = 71<br>70 (35.0 – 154)                 | <b>p = 0.028</b> |
| LDH (median level in U/L (IQR))                                                                            | N = 57<br>351 (270 – 491)            | N = 61<br>273 (227 – 434)                 | <b>p = 0.021</b> |
| CT-severity score (median score (IQR))                                                                     | N = 33<br>11.0 (7.0 – 15.0)          | N = 40<br>12.0 (6.0 – 16.8)               | p = 0.86         |
| <b>Outcome</b>                                                                                             |                                      |                                           |                  |
| Death or palliative discharge (N (%))                                                                      | 14 / 72 (19.4%)                      | 18 / 73 (24.7 %)                          | p = 0.55         |
| ICU-admission (N (%), 'do not intubate' excluded)                                                          | 24 / 65 (36.9 %)                     | 25 / 61 (41.0 %)                          | p = 0.72         |
| Invasive ventilation (N (%)), 'do not intubate' excluded                                                   | 18 / 64 (28.1 %)                     | 23 / 60 (38.3 %)                          | p = 0.26         |

CRP = C-reactive protein; LDH = lactate dehydrogenase; CT = computed tomography; ICU = intensive care unit; eGFR = estimated glomerular filtration rate; CKD-epi = chronic kidney disease Epidemiology Collaboration. Significance was assessed using a Mann-Whitney test (for numerical data) or Chi-square test (for categorical data). p – values for all groups indicate the 2-tailed significance between the two groups.

1  
2  
3  
4  
5  
6  
7  
8  
9  
10  
11  
12  
13  
14  
15  
16  
17  
18  
19  
20  
21  
22  
23  
24  
25  
26  
27  
28  
29  
30  
31  
32  
33  
34  
35  
36  
37  
38  
39  
40  
41  
42  
43  
44  
45  
46  
47  
48  
49  
50  
51  
52  
53  
54  
55  
56  
57  
58  
59  
60

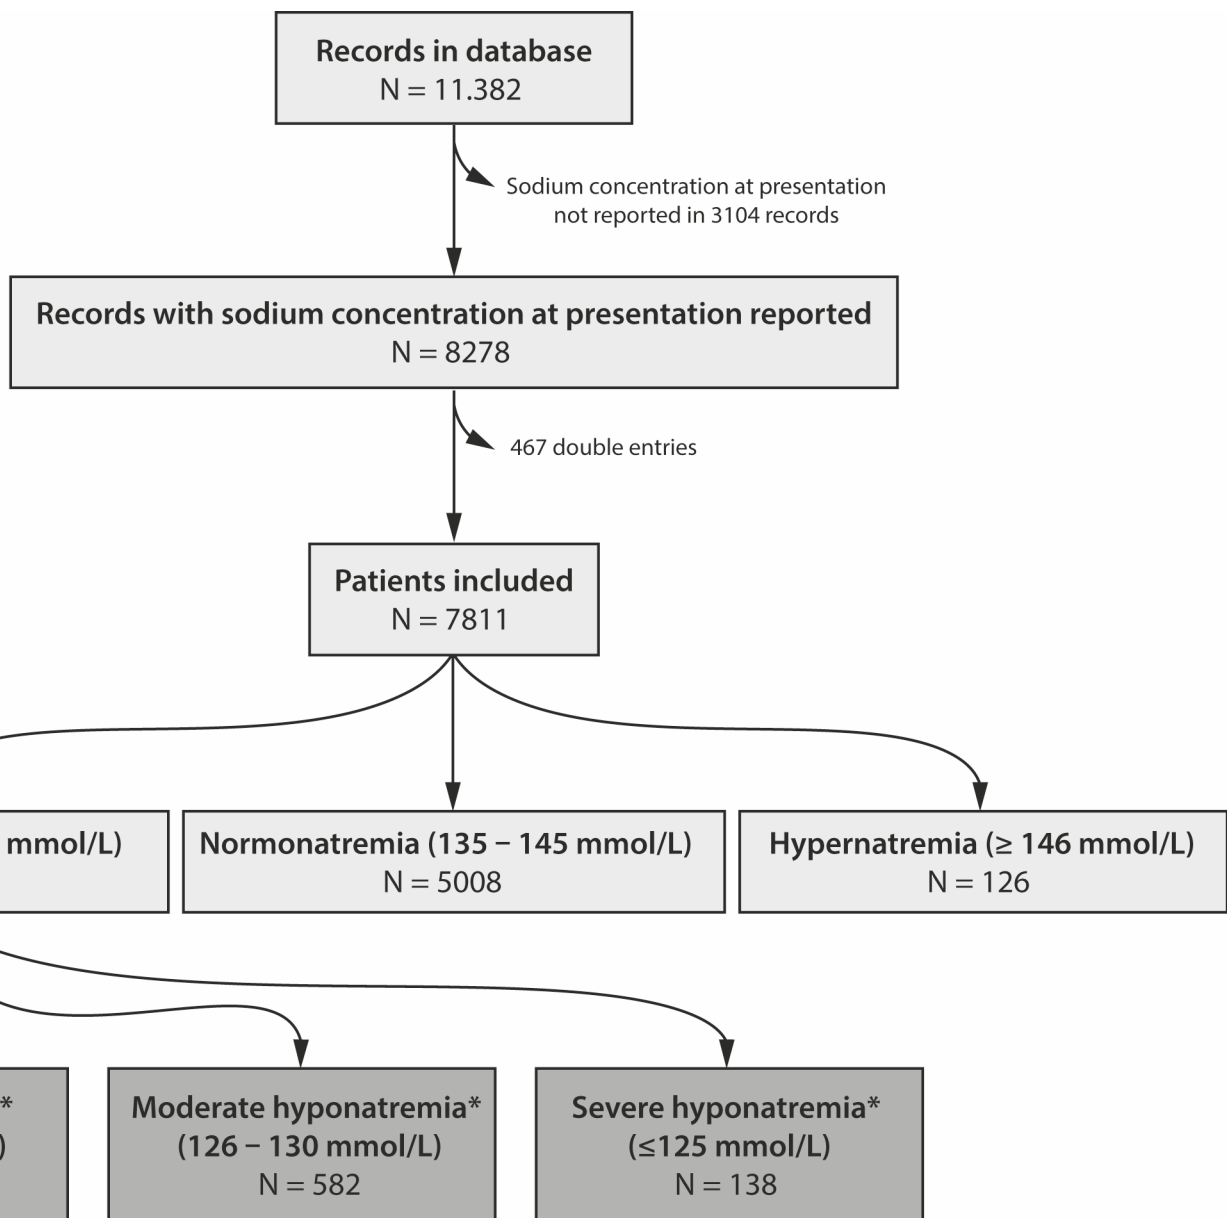



A. Cox regression survival curve at mean of covariates

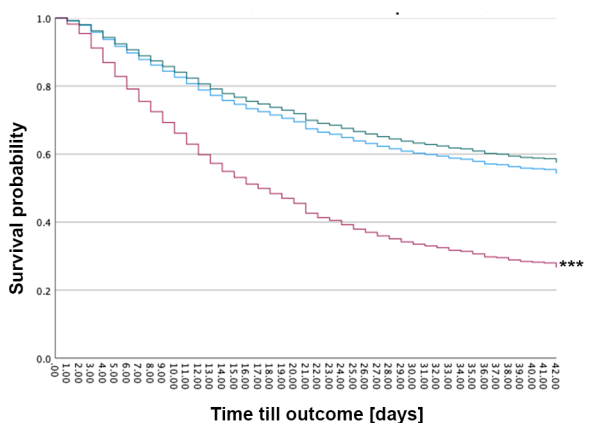

B. Cox regression survival curve at mean of covariates corrected for age, sex assigned at birth, chronic kidney disease, and hypertension

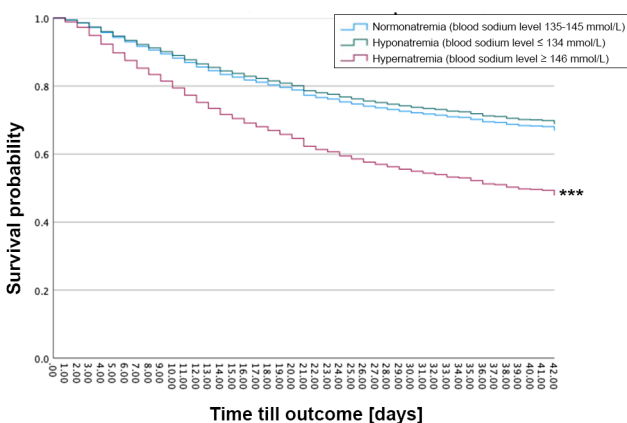

C. Cox regression survival curve at mean of covariates categorized by severity groups

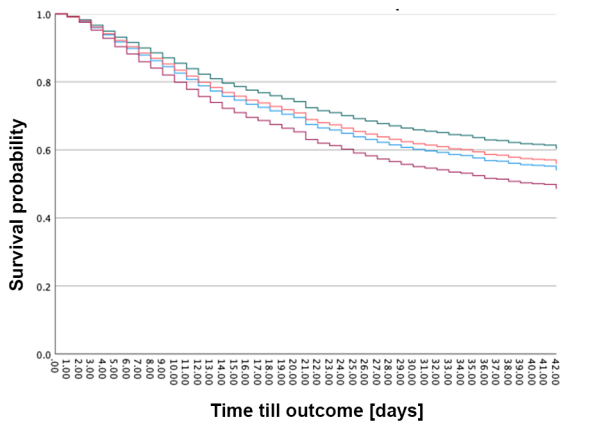

D. Cox regression survival curve at mean of covariates corrected for age, sex assigned at birth, chronic kidney disease, and hypertension, categorized by severity groups

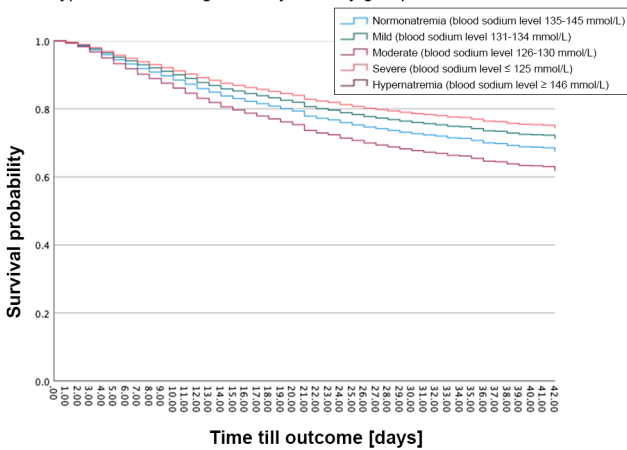

**STROBE 2007 (v4) Statement—Checklist of items that should be included in reports of *cohort studies***

| Section/Topic                | Item # | Recommendation                                                                                                                                                                       | Reported on page # |
|------------------------------|--------|--------------------------------------------------------------------------------------------------------------------------------------------------------------------------------------|--------------------|
| <b>Title and abstract</b>    | 1      | (a) Indicate the study's design with a commonly used term in the title or the abstract                                                                                               | 1 and 2            |
|                              |        | (b) Provide in the abstract an informative and balanced summary of what was done and what was found                                                                                  | 2                  |
| <b>Introduction</b>          |        |                                                                                                                                                                                      |                    |
| Background/rationale         | 2      | Explain the scientific background and rationale for the investigation being reported                                                                                                 | 4                  |
| Objectives                   | 3      | State specific objectives, including any prespecified hypotheses                                                                                                                     | 5                  |
| <b>Methods</b>               |        |                                                                                                                                                                                      |                    |
| Study design                 | 4      | Present key elements of study design early in the paper                                                                                                                              | 6                  |
| Setting                      | 5      | Describe the setting, locations, and relevant dates, including periods of recruitment, exposure, follow-up, and data collection                                                      | 6                  |
| Participants                 | 6      | (a) Give the eligibility criteria, and the sources and methods of selection of participants. Describe methods of follow-up                                                           | 6                  |
|                              |        | (b) For matched studies, give matching criteria and number of exposed and unexposed                                                                                                  | -                  |
| Variables                    | 7      | Clearly define all outcomes, exposures, predictors, potential confounders, and effect modifiers. Give diagnostic criteria, if applicable                                             | 6 and 7            |
| Data sources/<br>measurement | 8*     | For each variable of interest, give sources of data and details of methods of assessment (measurement). Describe comparability of assessment methods if there is more than one group | 6 and 7            |
| Bias                         | 9      | Describe any efforts to address potential sources of bias                                                                                                                            | 7                  |
| Study size                   | 10     | Explain how the study size was arrived at                                                                                                                                            | 8                  |
| Quantitative variables       | 11     | Explain how quantitative variables were handled in the analyses. If applicable, describe which groupings were chosen and why                                                         | 6 and 7            |
| Statistical methods          | 12     | (a) Describe all statistical methods, including those used to control for confounding                                                                                                | 7                  |
|                              |        | (b) Describe any methods used to examine subgroups and interactions                                                                                                                  | 7                  |
|                              |        | (c) Explain how missing data were addressed                                                                                                                                          | 7                  |
|                              |        | (d) If applicable, explain how loss to follow-up was addressed                                                                                                                       | 7                  |
|                              |        | (e) Describe any sensitivity analyses                                                                                                                                                | -                  |
| <b>Results</b>               |        |                                                                                                                                                                                      |                    |

|                          |     |                                                                                                                                                                                                              |                       |
|--------------------------|-----|--------------------------------------------------------------------------------------------------------------------------------------------------------------------------------------------------------------|-----------------------|
| Participants             | 13* | (a) Report numbers of individuals at each stage of study—eg numbers potentially eligible, examined for eligibility, confirmed eligible, included in the study, completing follow-up, and analysed            | 8                     |
|                          |     | (b) Give reasons for non-participation at each stage                                                                                                                                                         | 8                     |
|                          |     | (c) Consider use of a flow diagram                                                                                                                                                                           | FIG 1                 |
| Descriptive data         | 14* | (a) Give characteristics of study participants (eg demographic, clinical, social) and information on exposures and potential confounders                                                                     | Table 1, p 24         |
|                          |     | (b) Indicate number of participants with missing data for each variable of interest                                                                                                                          | Table 1-4, p 24 to 29 |
|                          |     | (c) Summarise follow-up time (eg, average and total amount)                                                                                                                                                  | -                     |
| Outcome data             | 15* | Report numbers of outcome events or summary measures over time                                                                                                                                               | FIG 2                 |
| Main results             | 16  | (a) Give unadjusted estimates and, if applicable, confounder-adjusted estimates and their precision (eg, 95% confidence interval). Make clear which confounders were adjusted for and why they were included | Table 3, p 27-29      |
|                          |     | (b) Report category boundaries when continuous variables were categorized                                                                                                                                    | 6                     |
|                          |     | (c) If relevant, consider translating estimates of relative risk into absolute risk for a meaningful time period                                                                                             | -                     |
| Other analyses           | 17  | Report other analyses done—eg analyses of subgroups and interactions, and sensitivity analyses                                                                                                               | 8, 9, 11              |
| <b>Discussion</b>        |     |                                                                                                                                                                                                              |                       |
| Key results              | 18  | Summarise key results with reference to study objectives                                                                                                                                                     | 12                    |
| <b>Limitations</b>       |     |                                                                                                                                                                                                              |                       |
| Interpretation           | 20  | Give a cautious overall interpretation of results considering objectives, limitations, multiplicity of analyses, results from similar studies, and other relevant evidence                                   | 12-17                 |
| Generalisability         | 21  | Discuss the generalisability (external validity) of the study results                                                                                                                                        | 16                    |
| <b>Other information</b> |     |                                                                                                                                                                                                              |                       |
| Funding                  | 22  | Give the source of funding and the role of the funders for the present study and, if applicable, for the original study on which the present article is based                                                | 19                    |

\*Give information separately for cases and controls in case-control studies and, if applicable, for exposed and unexposed groups in cohort and cross-sectional studies.

**Note:** An Explanation and Elaboration article discusses each checklist item and gives methodological background and published examples of transparent reporting. The STROBE checklist is best used in conjunction with this article (freely available on the Web sites of PLoS Medicine at <http://www.plosmedicine.org/>, Annals of Internal Medicine at <http://www.annals.org/>, and Epidemiology at <http://www.epidem.com/>). Information on the STROBE Initiative is available at [www.strobe-statement.org](http://www.strobe-statement.org).

# BMJ Open

## What is the etiology of dysnatremia in COVID-19 and how is this related to outcomes in patients admitted during earlier and later COVID-19 waves? A multicentre, retrospective observational study in eleven Dutch hospitals

|                                 |                                                                                                                                                                                                                                                                                                                                                                                                                                                                                                                                                                                                                                                                                                                                                                                                                                                                                                                                                                                                                                                                                                                                                                                                                                                                                                                                                                                                                                                                                                                                                             |
|---------------------------------|-------------------------------------------------------------------------------------------------------------------------------------------------------------------------------------------------------------------------------------------------------------------------------------------------------------------------------------------------------------------------------------------------------------------------------------------------------------------------------------------------------------------------------------------------------------------------------------------------------------------------------------------------------------------------------------------------------------------------------------------------------------------------------------------------------------------------------------------------------------------------------------------------------------------------------------------------------------------------------------------------------------------------------------------------------------------------------------------------------------------------------------------------------------------------------------------------------------------------------------------------------------------------------------------------------------------------------------------------------------------------------------------------------------------------------------------------------------------------------------------------------------------------------------------------------------|
| Journal:                        | <i>BMJ Open</i>                                                                                                                                                                                                                                                                                                                                                                                                                                                                                                                                                                                                                                                                                                                                                                                                                                                                                                                                                                                                                                                                                                                                                                                                                                                                                                                                                                                                                                                                                                                                             |
| Manuscript ID                   | bmjopen-2023-075232.R2                                                                                                                                                                                                                                                                                                                                                                                                                                                                                                                                                                                                                                                                                                                                                                                                                                                                                                                                                                                                                                                                                                                                                                                                                                                                                                                                                                                                                                                                                                                                      |
| Article Type:                   | Original research                                                                                                                                                                                                                                                                                                                                                                                                                                                                                                                                                                                                                                                                                                                                                                                                                                                                                                                                                                                                                                                                                                                                                                                                                                                                                                                                                                                                                                                                                                                                           |
| Date Submitted by the Author:   | 04-Sep-2023                                                                                                                                                                                                                                                                                                                                                                                                                                                                                                                                                                                                                                                                                                                                                                                                                                                                                                                                                                                                                                                                                                                                                                                                                                                                                                                                                                                                                                                                                                                                                 |
| Complete List of Authors:       | de Haan, Lianne; Flevo Hospital, Department of Internal Medicine; Medical Centre Alkmaar, Department of Internal Medicine<br>ten Wolde, Marije; Flevo Hospital, Department of Internal Medicine<br>Beudel, Martijn; Amsterdam University Medical Centers, Neurology<br>Olde Engberink, Rik H G ; Amsterdam University Medical Centres, Center of Experimental and Molecular Medicine<br>Appelman, Brent; Amsterdam UMC location University of Amsterdam, Center for Experimental and Molecular Medicine<br>Haspels-Hogervorst, Esther; Martini Hospital, Department of intensive care<br>Rusch, Daisy; Martini Ziekenhuis, Department of intensive care<br>Gritters van den Oever, Niels; Treant Zorggroep, Department of Intensive Care<br>Simsek, Suat; Noordwest Ziekenhuisgroep, Department of Internal Medicine<br>Paternotte, Nienke; Northwest Hospital Group, Pulmonology<br>van den Bergh, Joop; VieCuri Medical Centre, Department of Internal Medicine<br>Wyers, Caroline; VieCuri Medical Centre, Department of Internal Medicine<br>de Kruif, Martijn; Zuyderland Medical Centre Heerlen, Department of Pulmonary Medicine<br>Dormans, Tom; Zuyderland Medical Centre, Department of Intensive Care<br>Moeniralam, Hazra; Sint Antonius Hospital, Department of Internal Medicine<br>Bokhizzou, Neyma; Bovenij Hospital, Internal Medicine<br>Brinkman, Kees; OLVG, Dept of Internal Medicine<br>Douma, Renee; Flevo Hospital, Department of Internal Medicine<br>Collaborator, COVIDPredict Study Group; Amsterdam University Medical Centres |
| <b>Primary Subject Heading</b>: | Infectious diseases                                                                                                                                                                                                                                                                                                                                                                                                                                                                                                                                                                                                                                                                                                                                                                                                                                                                                                                                                                                                                                                                                                                                                                                                                                                                                                                                                                                                                                                                                                                                         |
| Secondary Subject Heading:      | Renal medicine, Respiratory medicine                                                                                                                                                                                                                                                                                                                                                                                                                                                                                                                                                                                                                                                                                                                                                                                                                                                                                                                                                                                                                                                                                                                                                                                                                                                                                                                                                                                                                                                                                                                        |
| Keywords:                       | INTERNAL MEDICINE, COVID-19, INFECTIOUS DISEASES                                                                                                                                                                                                                                                                                                                                                                                                                                                                                                                                                                                                                                                                                                                                                                                                                                                                                                                                                                                                                                                                                                                                                                                                                                                                                                                                                                                                                                                                                                            |

1  
2  
3  
4  
5  
6  
7  
8  
9  
10  
11  
12  
13  
14  
15  
16  
17  
18  
19  
20  
21  
22  
23  
24  
25  
26  
27  
28  
29  
30  
31  
32  
33  
34  
35  
36  
37  
38  
39  
40  
41  
42  
43  
44  
45  
46  
47  
48  
49  
50  
51  
52  
53  
54  
55  
56  
57  
58  
59  
60



SCHOLARONE™  
Manuscripts



I, the Submitting Author has the right to grant and does grant on behalf of all authors of the Work (as defined in the below author licence), an exclusive licence and/or a non-exclusive licence for contributions from authors who are: i) UK Crown employees; ii) where BMJ has agreed a CC-BY licence shall apply, and/or iii) in accordance with the terms applicable for US Federal Government officers or employees acting as part of their official duties; on a worldwide, perpetual, irrevocable, royalty-free basis to BMJ Publishing Group Ltd ("BMJ") its licensees and where the relevant Journal is co-owned by BMJ to the co-owners of the Journal, to publish the Work in this journal and any other BMJ products and to exploit all rights, as set out in our [licence](#).

The Submitting Author accepts and understands that any supply made under these terms is made by BMJ to the Submitting Author unless you are acting as an employee on behalf of your employer or a postgraduate student of an affiliated institution which is paying any applicable article publishing charge ("APC") for Open Access articles. Where the Submitting Author wishes to make the Work available on an Open Access basis (and intends to pay the relevant APC), the terms of reuse of such Open Access shall be governed by a Creative Commons licence – details of these licences and which [Creative Commons](#) licence will apply to this Work are set out in our licence referred to above.

Other than as permitted in any relevant BMJ Author's Self Archiving Policies, I confirm this Work has not been accepted for publication elsewhere, is not being considered for publication elsewhere and does not duplicate material already published. I confirm all authors consent to publication of this Work and authorise the granting of this licence.

1  
2  
3  
4  
5  
6  
7  
8  
9  
10  
11  
12  
13  
14  
15  
16  
17  
18  
19  
20  
21  
22

# What is the etiology of dysnatremia in COVID-19 and how is this related to outcomes in patients admitted during earlier and later COVID-19 waves? A multicentre, retrospective observational study in eleven Dutch hospitals

23 L.R. de Haan<sup>a, f1, \*</sup>, M. ten Wolde<sup>a1</sup>, M. Beudel<sup>b</sup>, R.H. Olde Engberink<sup>c1</sup>, B. Appelman<sup>c2</sup>, E.K. Haspels-  
24 Hogervorst<sup>d1</sup>, D. Rusch<sup>d2</sup>, N.C. Gritters-van den Oever<sup>e</sup>, S. Simsek<sup>f1</sup>, N. Paternotte<sup>f2</sup>, J.P. van den  
25 Bergh<sup>g1</sup>, C.E. Wyers<sup>g2</sup>, M. de Kruif<sup>h1</sup>, T. Dormans<sup>h2</sup>, H. Moeniralam<sup>i</sup>, N. Bokhizzoui<sup>j</sup>, K. Brinkman<sup>k</sup>, R.A.  
26 Douma<sup>a2</sup>, on behalf on The Dutch COVID-PREDICT study group  
27  
28  
29  
30  
31

32 <sup>a</sup> Department of Internal Medicine, Flevo Hospital, Almere, the Netherlands

33 <sup>b</sup> Department of Neurology, Amsterdam University Medical Centre

34 <sup>c</sup> Center of Experimental and Molecular Medicine (C.E.M.M.), Location Academic Medical Center,  
35 Amsterdam UMC, Amsterdam, The Netherlands

36 <sup>d</sup> Department of Intensive Care, Martini Hospital, Groningen, the Netherlands

37 <sup>e</sup> Department of Intensive Care, Treant Hospitals, Hoogeveen, Emmen, and Stadskanaal, the  
38 Netherlands

39 <sup>f1</sup> Department of Internal Medicine, Northwest Clinics, Alkmaar, the Netherlands

40 <sup>f2</sup> Department of Pulmonary diseases, Northwest Clinics, Alkmaar, the Netherlands

41 <sup>g</sup> Department of Internal Medicine, VieCuri Medical Centre, Venlo, the Netherlands

42 <sup>h1</sup> Department of Pulmonary diseases, Zuyderland Medical Centre, Heerlen, the Netherlands

43 <sup>h2</sup> Department of Intensive Care, Zuyderland Medical Centre, Heerlen, the Netherlands

44 <sup>i</sup> Department of Internal Medicine, St. Antonius Hospital, Nieuwegein, the Netherlands

45 Department of Internal Medicine, BovenIJ hospital, Amsterdam, the Netherlands

46 <sup>k</sup> Department of Internal Medicine, Onze Lieve Vrouwe Gasthuis, Amsterdam, the Netherlands

47  
48  
49  
50  
51  
52  
53  
54  
55  
56  
57 \* **Corresponding author:** Lianne R. de Haan, Department of Internal Medicine,  
58 Flevoziekenhuis, Hospitaalweg 1, 1315 RA Almere, The Netherlands, E: [lr.de.haan@nwz.nl](mailto:lr.de.haan@nwz.nl), T

1  
2  
3 +316-53853254. Present address: Department of Internal Medicine, Northwest Clinics,  
4 Wilhelminalaan 12, 1815 JD Alkmaar, The Netherlands.  
5  
6  
7

## 8 **Abstract**

### 9 **Objectives**

10 To evaluate the relation between dysnatremia at hospital presentation and duration of admission, risk  
11 of ICU-admission, and all-cause mortality and to assess the underlying pathophysiological mechanism  
12 of hyponatremia in COVID-19 patients. Our hypothesis is that both hypo- and hypernatremia at  
13 presentation are associated with adverse outcomes.  
14  
15  
16  
17  
18  
19

### 20 **Design**

21 Observational study  
22  
23  
24  
25  
26

### 27 **Setting**

28 Secondary care; eleven Dutch hospitals (2 university and 9 general hospitals)  
29  
30  
31  
32

### 33 **Participants**

34 An analysis was performed within the retrospective multicenter cohort study COVIDPredict. 7811  
35 patients were included (60% males, 40% females) between February 24<sup>th</sup> 2020 and August 19<sup>th</sup> 2022.  
36 Patients who were  $\geq 18$  years with PCR-confirmed COVID-19, or CT with COVID-19 reporting and data  
37 system score  $\geq 4$  and alternative diagnosis were included. Patients were excluded when serum sodium  
38 levels at presentation were not registered in the database or when they had been transferred from  
39 another participating hospital.  
40  
41  
42  
43  
44  
45  
46  
47

### 48 **Outcome measures**

49 We studied demographics, medical history, symptoms, and outcomes. Patients were stratified according  
50 to serum sodium concentration and urinary sodium excretion.  
51  
52  
53  
54  
55

### 56 **Results**

57 Hyponatremia was present in 2677 (34.2%) and hypernatremia in 126 (1.6%) patients. Patients with  
58 hyponatremia presented more frequently with diarrhea, lower blood pressure, and tachycardia.  
59  
60



1  
2  
3 Hyponatremia was, despite a higher risk for ICU admission (OR 1.27 (1.11-1.46; p <0.001), not  
4 associated with mortality or the risk for intubation. Patients with hypernatremia had higher mortality rates  
5 (OR 2.25 1.49 – 3.41; p <0.001) and were at risk for ICU-admission (OR 2.89 (1.83 – 4.58) and intubation  
6 (OR 2.95 (1.83 – 4.74)).  
7  
8  
9

### 10 11 12 **Conclusions**

13  
14 Hypernatremia at presentation was associated with adverse outcomes in COVID-19 patients.  
15 Hypovolemic hyponatremia was found to be the most common etiology of hyponatremia. Hyponatremia  
16 of unknown etiology was associated with a higher risk for ICU admission and intubation and longer  
17 duration of admission.  
18  
19  
20  
21  
22  
23  
24

### 25 **Strengths and limitations of this study**

- 26 - This study includes over 7000 patients from different COVID-19 waves and from multiple  
27 hospitals, resulting in an heterogenous patient population;
- 28 - This study relates the different presumed etiologies to clinical outcomes;
- 29 - A relative low number of urinary samples was available for patients with hyponatremia;
- 30 - Different treatment options that became available for COVID-19 during the ongoing pandemic  
31 were not taken into account in thus study, which may have influenced the outcome of patients.  
32  
33  
34  
35  
36  
37  
38  
39  
40  
41  
42  
43  
44  
45  
46  
47  
48  
49  
50  
51  
52  
53  
54  
55  
56  
57  
58  
59  
60

## 1. Introduction

The coronavirus known as severe acute respiratory syndrome coronavirus 2 (SARS-CoV-2) has caused a global pandemic since February 2020. By the time of October 19<sup>th</sup>, 2022, there had been over 621 million reported cases and 2.9 million deaths attributed to coronavirus disease 19 (COVID-19), which is caused by SARS-COV-2-infection. Respiratory failure resulting from acute respiratory distress syndrome is the leading cause of death associated with SARS-CoV-2 infection[1-3].

Common signs and symptoms of COVID-19 infection vary widely, but fever, cough, and dyspnea are frequently present. Other less frequent symptoms include anosmia, nausea, vomiting, diarrhea, and general illness[1]. In addition to these clinical symptoms, certain laboratory markers can indicate COVID-19. Elevated lactate dehydrogenase (LDH) levels and lymphopenia are commonly observed[4,5]. Furthermore, electrolyte imbalances such as hypocalcemia, hypokalemia, and dysnatremia (hypo- or hypernatremia) are often present in COVID-19 patients upon hospital admission[4,6]. Hyponatremia, in particular, has been reported in 7% to 64% of COVID-19 cases[7-11], compared to 20-30% in all hospitalized patients[12]. It has been demonstrated that critically ill patients with COVID-19 more frequently develop hyponatremia during the first 72 hours of admission[13]. Hyponatremia is also frequently present in other infectious diseases, such as pneumonia, tuberculosis, meningitis, human immunodeficiency virus (HIV) infection, malaria, and leishmaniasis and has been linked to negative outcomes in these diseases and in COVID-19[7,8,11,14-17]. On the other hand, hypernatremia is less common, occurring in less than 10% of the general population and in up to 38% of patients in intensive care units. Hypernatremia is also associated with adverse clinical outcomes[9,16,18-20].

The etiology of hyponatremia in infectious diseases, including COVID-19, can broadly be categorized into two groups based on urinary sodium excretion (USE). Low USE (<30 mmol/l) indicates an activation of the renin-angiotensin system (RAAS), e.g. due to hypovolemia resulting from inadequate dietary intake, vomiting or diarrhea. Conversely, high USE suggests RAAS inactivation, which could occur in patients with syndrome of inappropriate antidiuretic hormone secretion (SIADH) and in patients with critical illness-related corticoid deficiency, although diuretic usage can affect diagnostic accuracy[21,22]. In other infectious diseases, antidiuretic hormone (ADH) release has been linked to secretion of inflammatory marker interleukin-6[23]. Interleukin-6 is also enhanced in COVID-19 patients and is targeted by off-label administration of interleukin-6-inhibitors, like tocilizumab and

1  
2  
3 sarilumab[3,24]. Both etiologies (hypovolemic hyponatremia and inadequate ADH secretion) have been  
4  
5 proposed to contribute to hyponatremia in COVID-19, although the exact mechanism is still unclear.  
6  
7 Hypernatremia primarily occurs due to insufficient water intake, often caused by hypothalamic thirst  
8  
9 center dysfunction or limited access to fluid intake. It can also result from diabetes insipidus, a condition  
10  
11 characterized by ADH deficiency or resistance[25].

12  
13 Previous studies have associated both hyponatremia and hypernatremia with worse clinical  
14  
15 outcomes in COVID-19 patients during the early stages of the pandemic[7,8,11,15,17,19]. However,  
16  
17 most of these studies were conducted before interleukin-6 inhibitors were administered and before the  
18  
19 registration of Sars-CoV-2 vaccines[3,7,11,19,26-29]. Additionally, they lacked data on clinical  
20  
21 parameters at presentation and how they differed between patients with or without dysnatremia, making  
22  
23 it difficult to determine the underlying cause of the hyponatremia and to relate this cause to clinical  
24  
25 outcomes[16,27,30-32].

26  
27 This study reports the incidence rates of hypo- and hypernatremia upon admission in COVID-  
28  
29 19 patients from a large multi-center cohort study in The Netherlands, encompassing multiple COVID-  
30  
31 19 waves. We hypothesize that both hyponatremia and hypernatremia can predict adverse outcomes,  
32  
33 including ICU admission, the need for invasive ventilation, and mortality rates among hospitalized  
34  
35 COVID-19 patients. Furthermore, we seek to investigate potential pathophysiological mechanisms  
36  
37 underlying these conditions based on clinical features and laboratory values at presentation.  
38  
39  
40  
41  
42  
43  
44  
45  
46  
47  
48  
49  
50  
51  
52  
53  
54  
55  
56  
57  
58  
59  
60

## 2. Methods

### 2.1 Patient recruitment

We utilized data from the ongoing retrospective multicenter COVIDPredict Clinical Course Cohort, containing over 10,000 patients with COVID-19, recruited between February 24<sup>th</sup>, 2020, and August 9<sup>th</sup>, 2022, in eleven Dutch hospitals (two university and nine general hospitals). Inclusion criteria for the database required patients to be 18 years or older and either had a positive polymerase chain reaction (PCR) test for SARS-CoV-2 or had a COVID-19 reporting data system (CO-RADS) score of 4 (indicating abnormalities suspicious for COVID-19) or 5 (indicating typical COVID-19) on thoracic computed tomography (CT)-scan in the absence of an alternative diagnosis[33]. A waiver for the use of hospital data was obtained from the Medical Ethical Committees of the participating centers (Amsterdam UMC; 20.131) to utilize the hospital data. Patients were given the opportunity to opt out. To avoid duplicate entries, patients transferred from one participating hospital to another were excluded, resulting in a total 297 exclusions.

### 2.2 Study design

The included patients were categorized into three groups based on their serum sodium concentration upon admission to the participating hospital. The serum sodium concentration was adjusted for serum glucose concentration, whenever available, following the method described by Hillier, et al. [34]. The sodium concentrations were stratified as follows: 'normonatremia' (corrected serum sodium concentration (Na) 135-145 mmol/L), hyponatremia (corrected serum sodium concentration (Na) <135 mmol/L), further subcategorized as 'mild' (corrected serum sodium concentration Na 131-134 mmol/L), 'moderate' (corrected serum sodium concentration Na 126-130 mmol/L), and 'severe' (corrected serum sodium concentration Na  $\leq$  125 mmol/L) (Supplemental information). 'Hypernatremia' referred to corrected serum sodium concentration Na  $\geq$  146 mmol/L. Throughout the text, serum sodium concentrations and sodium groups refer to the corrected sodium values unless otherwise specified.

Demographic information such as ethnicity, sex at birth, and age, as well as co-morbidities categorized according to predetermined groups (additional information in the Supplemental Information), home medication, and presenting signs and symptoms were compared between the

1  
2  
3 groups and between normonatremia and different severity categories of hyponatremia (Supplemental  
4 information). Serum concentrations of creatinine, urea, C-reactive protein (CRP), and LDH were  
5 measured at the time of first presentation in the participating hospital. The estimated glomerular filtration  
6 rate (eGFR) was calculated using the 2021 Chronic kidney disease Epidemiology Collaboration (CKD-  
7 epi) formula based on serum creatinine levels[35]. The Modified Early Warning Score (MEWS) and  
8 Quick Sequential Organ Failure Assessment (qSOFA) were calculated based in clinical values obtained  
9 at presentation.  
10  
11  
12  
13  
14  
15

16 The following clinical outcome measures were compared between the groups and across  
17 different severity categories: duration of hospitalization, admission to intensive care unit, invasive  
18 ventilation, duration of ICU admission, discharge alive, death, and the administration of tocilizumab,  
19 sarilumab, or anakinra. Additionally, the incidence of complications was compared between the groups.  
20  
21  
22  
23  
24  
25

### 26 **2.3 Statistical analysis**

27  
28  
29

30 All data were analyzed using SPSS version 27. Comparisons were conducted between hyper-, normo-  
31 , and hyponatremia (Main Text) and between the normonatremia, mild, moderate, and severe  
32 hyponatremia groups (Supplemental Information). Baseline numerical data were presented as median  
33 and interquartile range, and the Kruskal Wallis test was used for analysis when the data were not  
34 normally distributed. For normally distributed data, baseline numerical data were presented as mean  
35 and standard deviation, and one-way ANOVA was employed for analysis. Baseline categorical data  
36 were displayed as absolute number and percentage of patients with the specific condition, and the Chi-  
37 square test was used for analysis.  
38  
39  
40  
41  
42  
43  
44

45 Outcome data (risk for ICU-admission, intubation, mortality rates, use of tocilizumab, sarilumab, or  
46 anakinra, and complications) were assessed using a binary logistic regression model. The odds ratios  
47 were calculated and adjusted for age, sex assigned at birth (categorized as male or female based on  
48 genotype and internal and external anatomy at birth), a history of chronic kidney disease, and a history  
49 of hypertension. The duration of hospital and ICU admission were evaluated using a Kruskal Wallis test.  
50  
51  
52  
53  
54  
55  
56  
57  
58  
59  
60

1  
2  
3 discharged alive for patients with and without dysnatremia. The hazard ratios were adjusted for age,  
4 sex assigned at birth, a history of chronic kidney disease, and a history of hypertension.  
5

6  
7 A p-value of  $\leq 0.05$  was considered statistically significant for all statistical tests. Patients who did  
8 not have data available for the specific variable being tested were excluded from the corresponding  
9 analysis.  
10  
11

## 12 13 14 **2.4 Patients and public involvement**

15  
16 This study was largely conducted during the first waves of the COVID-19 pandemic. As a result, it was  
17 not feasible to directly involve patients in the design of the study. Patients received information about  
18 the CovidPredict database via pamphlets and verbal communication. Additionally, information was  
19 available on the websites of participating hospitals and through various media channels. Details  
20 regarding the study design and dissemination plans are available on our website [www.covidpredict.org](http://www.covidpredict.org).  
21  
22  
23  
24  
25  
26  
27  
28  
29  
30  
31  
32  
33  
34  
35  
36  
37  
38  
39  
40  
41  
42  
43  
44  
45  
46  
47  
48  
49  
50  
51  
52  
53  
54  
55  
56  
57  
58  
59  
60

### 3. Results

#### 3.1 Incidence of dysnatremia at presentation

At the time of August 9<sup>th</sup>, 2022, the database contained a total of 11.382 records. Serum sodium concentrations at admission were available for 8278 (73%) admissions from 7811 patients (170 duplicate entries due to readmission and 297 patients had been transferred from or previously admitted to another participating hospital and transfer records were therefore excluded). Patients were included based on two criteria: a positive result for SARS-CoV-2 PCR (6673 patients) and or a CO-RADS score 4 or 5 in the absence of an alternative diagnosis (1138 patients). In cases where patients were readmitted, the admission with the abnormal sodium level at presentation (in case of hyponatremia or hypernatremia) or the first admission (in case sodium concentrations were normal for both presentations) was included in the analysis.

Of the 7811 included patients with COVID-19, 2677 (34.3%) presented with hyponatremia (corrected blood serum Na <135 mmol/L), and 126 (1.6%) presented with hypernatremia (corrected blood serum Na  $\geq$  146 mmol/L). Among the patients presenting with hyponatremia, 1957 (25.1%) presented with blood serum Na ranging 131-134 mmol/L (considered 'mild'), 582 (7.5%) presented with blood serum Na ranging 126-130 mmol/L (considered 'moderate'), and 138 (1.8%) with blood serum Na  $\leq$  125 mmol/L (considered 'severe') (see Supplemental Figure 1). A total of 1888 patients were included after the start of the SARS-CoV-19 vaccination campaign in the Netherlands on January 6<sup>th</sup>, 2021, of whom 445 were vaccinated (319 had received two or more doses). A total of 6186 patients (79.2%) started having symptoms prior to the seventh week of 2021, when the initial SARS-CoV-2 variants were most prevalent. 800 patients (10.2%) developed symptoms from the seventh to twenty-fifth week of 2021, when alpha-variants dominated in the Netherlands. 700 patients (9.0%) started having symptoms when delta variants dominated (twenty-sixth to fifty-first week of 2021), and 122 patients (1.6%) when the omicron variants dominated (after the fifty-second week of 2021)[36].

### 3.2 Patient characteristics of patients presenting with dysnatremia

Table 1 shows the characteristics of patients with hyponatremia and hypernatremia compared to patients presenting with normal sodium concentrations at presentation. Both hypo- and hypernatremia occurred more often in males than in females (Table 1), except for 'severe' hyponatremia (Supplemental Table 1). The mean age of patients with and without hyponatremia differed slightly, with patients presenting with 'moderate' or 'severe' hyponatremia being significantly older (median age 68.1 and 70.6 years, respectively). Patients with hypernatremia were also older, with a mean age of 72.5 years. The body mass index (BMI) of patients presenting with hyponatremia tended to be slightly lower compared to those with normal sodium levels and was also lower in patients presenting with hypernatremia. Abnormal sodium levels at presentation were associated with chronic kidney disease. Patients with hyponatremia, particularly those with severe hyponatremia, more frequently had a history of hypertension, but this difference was not statistically significant for the subgroup of patients who did not use diuretics (36.4% (normonatremia) vs. 39.1% (hyponatremia);  $p = 0.003$ ; determined by a Chi-square test). The presence of hypo- or hypernatremia was not associated with a history of chronic heart, pulmonary, or liver disease (refer to Supplemental Table 2 for definitions). Regarding medication use, the use of thiazide diuretics was higher in patients with hyponatremia (Table 1), but the overall use of diuretics or the use of loop diuretics did not differ between the groups. Similarly, the use of selective serotonin (and noradrenalin) reuptake inhibitors (SSRIs/SNRIs) did not show significant differences between the groups. The use of immunosuppressives was more common in patients presenting with hyponatremia as compared to those with normal sodium concentration at presentation.

### 3.3 Signs and symptoms of patients presenting with dysnatremia

Patients with hyponatremia more frequently presented with diarrhea and anosmia compared to patients without hyponatremia (Table 2 and Supplemental Table 3). The presence of vomiting or nausea as presenting symptoms was not associated with hyponatremia. In the hypernatremia group, confusion was more frequently observed compared to patients with normal sodium levels. A prolonged capillary refill time of  $\geq 3$ s, which may indicate dehydration, was more often present in the hypernatremia group.



1  
2  
3 Patients with hypernatremia also had a slightly higher heart rate. Hyponatremia was associated with a  
4 slightly higher heart rate and a slightly lower systolic blood pressure, although these differences were  
5 not clinically significant. Both patients with hypernatremia and hyponatremia had a lower eGFR, with a  
6 more pronounced effect observed in the hypernatremia group (Table 2). A lower eGFR was associated  
7 with slightly higher mortality rates (unadjusted HR 1.008, 95% CI 1.007 – 1.008);  $p = 0.001$ , analyzed  
8 using a Cox proportional hazard regression analysis), regardless of sodium levels at presentation or  
9 exclusion of patients with chronic kidney disease. Enhanced blood urea concentration was only  
10 associated with hypernatremia.  
11  
12  
13  
14  
15  
16  
17

18 Patients with hyponatremia had higher blood CRP and LDH concentrations compared to those  
19 with normal sodium levels (Table 2). However, the fraction of supplemented oxygen (FiO<sub>2</sub>) and CT-  
20 severity scores did not differ significantly between the groups. The clinical score systems MEWS and  
21 qSOFA[37] (Table 2) also showed significant differences between the groups, but these differences  
22 were not clinically relevant.  
23  
24  
25  
26  
27

28 Furthermore, patients with hyponatremia had a slightly longer duration of complaints compared  
29 to those with normonatremia (8.8 days for hyponatremia vs. 8.6 days for normonatremia;  $p = 0.010$ ;  
30 assessed using a Kruskal-Wallis test), although this difference was not clinically relevant.  
31  
32  
33  
34  
35

### 36 **3.4 Clinical outcomes in patients presenting with dysnatremia**

37  
38

39 Hypernatremia was associated with higher mortality rates or palliative discharge rates compared to the  
40 normo- and hyponatremia groups (Table 3, Figure 1, and Supplemental Figure 2). Additionally, patients  
41 with hypernatremia had a higher risk of ICU-admission and invasive ventilation. However, hyponatremia  
42 was not associated with increased mortality or palliative discharge rates (Table 3). Although there was  
43 a trend towards increased mortality in patients with severe hyponatremia, these results did not reach  
44 statistical significance due to the low number of patients that presented with sodium levels  $\leq 125$   
45 mmol/L (Supplemental Table 4). After excluding patients with a 'do not intubate' order hyponatremia  
46 was associated with a higher likelihood of ICU-admission, but not with the need for invasive ventilation.  
47 Off all hyponatremic patients to admitted to the ICU (N = 486), 62 (12.8%) did not receive any form of  
48 ventilatory support ((non-)invasive ventilation or high flow nasal therapy). This percentage was similar  
49 (10.5 %;  $p = 0.403$ ) among patients with normonatremia admitted to the ICU. The duration of ICU  
50  
51  
52  
53  
54  
55  
56  
57  
58  
59  
60

1  
2  
3 admission was similar for patients with hypo-, normo-, and hypernatremia (Table 3). Based on the  
4 additional details provided in Supplemental Table 5, patients with the order 'do not intubate' are  
5 considered frailer and thus had limited live expectancy.  
6  
7

8 Hyponatremia corrected for glucose was used for all statistical testing. However, as some other  
9 studies used uncorrected hyponatremia[30,38], we also examined the association of uncorrected  
10 hyponatremia with different outcomes. Without correction for serum glucose concentration,  
11 hyponatremia was still associated with a slightly higher rate of ICU admission (adjusted odds ratio (<sup>A</sup>OR)  
12 1.40 (1.23 – 1.60);  $p < 0.001$ ) and with the need for intubation (<sup>A</sup>OR 1.26 (1.10 – 1.46);  $p = 0.001$ ), but  
13 not with death or palliative discharge rates (<sup>A</sup>OR 1.11 (0.97 – 1.28);  $p = 0.13$ ).  
14  
15  
16  
17  
18  
19

20 Despite the correlation with ICU admission in patients with hyponatremia, the duration of  
21 admission was not significantly longer in this group. Similar outcomes were observed for patients with  
22 confirmed COVID-19 (SARS-CoV-2 PCR positive; 6673 patients) only, although in this subgroup, the  
23 higher risk for ICU admission for patients with hyponatremia no longer reached statistical significance.  
24  
25  
26  
27

28 As the COVID-19 pandemic progressed, the incidence of adverse outcomes was significantly  
29 higher for patients with normo-, and hyponatremia at presentation that started having complaints when  
30 delta variants dominated as compared to those admitted during the earlier COVID-19 waves when the  
31 initial variants dominated (Figure 2). The use of tocilizumab, sarilumab (interleukin-6 receptor agonists)  
32 and anakinra (interleukin-1 receptor agonist) did not differ between the groups. Administration of  
33 COVID-19 vaccination was not reported frequently enough to draw conclusions about its possible effects  
34 on outcome measures.  
35  
36  
37  
38  
39  
40  
41  
42  
43

### 44 **3.5 Complications associated with hyponatremia upon admission**

45  
46  
47  
48 After adjusting for sex assigned at birth, age, and a history of chronic kidney disease and hypertension,  
49 the course of disease of patients with hyponatremia was more often complicated by an aspergillosis  
50 pneumonia (almost exclusively in patients that needed invasive ventilation and more frequently in  
51 patients treated with dexamethasone, antibiotics, tocilizumab, sarilumab, or anakinra) and physical  
52 decline (the latter was scored when explicitly documented in the patients' medical records, when the  
53 patient suffered from 'ICU-acquired weakness', or when the patient was referred for medical  
54 rehabilitation).  
55  
56  
57  
58  
59  
60

1  
2  
3 Patients with hyponatremia, on the other hand, were more likely to experience acute respiratory  
4 distress syndrome and receive treatment for septic shock (defined as the need for vasopressors in order  
5 to maintain mean arterial blood pressure >65 mmHg and blood lactate level >2 mmol/L, in the absence  
6 of other causes including hypovolemia). They also had a higher incidence of delirium. It should be noted  
7 that excessive fluid resuscitation for the management of hypo- or hyponatremia could potentially lead  
8 to congestive heart failure, but the occurrence of this complication was rare and did not occur more  
9 frequently in patients with abnormal sodium values at presentation.  
10  
11  
12  
13  
14  
15  
16  
17  
18  
19

### 20 **3.6 Urinary sodium excretion related to patients' characteristics and outcomes**

21  
22  
23

24 USE was measured in 185 (6.9%) patients with hyponatremia of whom 145 (78%) did not use  
25 diuretics. Among these patients were 48 with 'mild', 67 with 'moderate', and 30 with 'severe'  
26 hyponatremia. The range of USE was 5.0 to 239 mmol/L, with a median of 30.0 mmol/L. Urinary  
27 osmolality (UOL) was measured in 81 (3.0%) patients who did not use diuretics, including 26 with 'mild',  
28 37 with 'moderate', and 18 with 'severe' hyponatremia. The range of UOL values was 8 - 1007  
29 mOsmol/kg, with a median of 496 mOsmol/kg. Among patients in whom both USE and UOL were  
30 measured, 12 patients (15% of the total) met the definition of SIADH (USE  $\geq$  30 mmol/L and UOL  $\geq$   
31 100 mOsmol/kg in the absence of diuretic use and signs of hypovolemia (systolic blood pressure < 90  
32 mmHg or heart rate  $\geq$  100 BPM)).  
33  
34  
35  
36  
37  
38  
39  
40

41 Patients were divided in two groups based on USE. Out of urinary sodium measurements, 72  
42 patients (49.7%) had low USE (< 30 mmol/L), indicating activation of the RAAS, while 73 patients  
43 (50.3%) had high USE ( $\geq$  30 mmol/L), indicating activation of the RAAS (Supplemental Table 6). A low  
44 USE was associated with a higher levels of CRP (111 (52.5 – 163) mmol/L vs. 70 (35.0 – 154) mmol/L;  
45  $p = 0.028$ ) and LDH (351 (270 – 491) U/L vs. 273 (227- 434) U/L;  $p = 0.021$ ) at presentation  
46 (Supplemental Table 6), but was not associated with symptoms such as nausea / vomiting or clinical  
47 signs of hypovolemia, such as tachycardia or hypotension. There were no significant differences in  
48 outcome measures, such as duration of admission, ICU admission, or death/palliative discharge,  
49 between patients with a low and high USE.  
50  
51  
52  
53  
54  
55  
56  
57  
58  
59  
60

### 3.7 Etiology related to outcomes

Among the patients who presented with hyponatremia, 983 patients (36.7%) reported a history of gastrointestinal symptoms, such as nausea, vomiting, or diarrhea, and did not use diuretics or met the criteria for SIADH. The prevalence of gastrointestinal symptoms was highest when delta variants dominated (Supplemental Table 7). 271 patients (10.1%) used diuretics in the absence of gastrointestinal symptoms and this percentage was higher for patients that started having symptoms during the omicron wave (Supplemental Table 7). 12 (0.5%) who did not use diuretics complied to the definition of SIADH, of whom 5 also had gastro-intestinal symptoms. All patients that complied to the definition of SIADH started having symptoms when the initial COVID-19 variants dominated (Supplemental Table 7). Another group of 201 patients (7.5) had a history of nausea, vomiting, or diarrhea and used diuretics. However, the largest portion of patients (1210 patients, 45.2%) had an unknown etiology for hyponatremia, as they did not have a history of gastrointestinal symptoms, did not use diuretics, and did not meet the criteria for SIADH.

Figure 1D illustrates a cox proportional hazard curve, with separate lines representing each proposed etiology. It was observed that patients with a history of gastrointestinal symptoms had lower mortality rates compared to those with normal sodium levels (unadjusted hazard ratio (HR) 0.739, 95% confidence interval (CI) 0.611 – 0.894;  $p = 0.002$ ), despite higher CRP (mean 95 mg/L, IQR 47.5 – 151 mg/L) and LDH levels (mean 350 U/L, IQR 271 – 470 U/L) compared to normonatremia ( $p < 0.001$ ; assessed using a Kruskal-Wallis test). Patients with hyponatremia of unknown etiology had a higher risk of ICU admission (unadjusted OR 1.299, 95% CI 1.091 – 1.549;  $p = 0.003$ ; linear regression) and were at risk for intubation (unadjusted OR 1.313, 95% CI 1.109 – 1.554;  $p = 0.002$ ; linear regression), which was in line with higher CRP levels (mean 98 mg/L, IQR 53 – 166 mg/L) and LDH levels (mean 353 U/L, IQR 270 – 479 U/L) in this group compared to normonatremia ( $p < 0.001$ ; assessed using a Kruskal-Wallis test). However, the duration of ICU admission did not differ significantly among the different groups. It was found that patients with hyponatremia of unknown etiology had a slightly longer duration of hospital admission (8 days, interquartile range 4 – 17 days) compared to other groups ( $p = 0.005$ ; assessed using the Kruskal-Wallis test).

#### 4. Discussion

This large multicenter observational cohort study examined 7811 patients with COVID-19 over an extended period and multiple phases of the COVID-pandemic. We found that hyponatremia was highly prevalent but not associated with higher mortality rates. Although less prevalent, hypernatremia was associated with a three-to-four-fold increased risk of worse outcomes, including increased risk of ICU-admission, intubation, and mortality. Hyponatremia was also associated with a higher risk for ICU-admission, but not for intubation.

Patients with hyponatremia experienced more complications such as aspergillosis pneumonia and physical decline, while those with hypernatremia were more prone to sepsis and delirium. Similar to previous studies, hypo- and hypernatremia were more prevalent in males than in females, in elderly patients, those with chronic kidney disease, and a lower BMI[9,15,17,26,28-30,38]. In contrast to others, we did not find an association between hyponatremia and diabetes, which possibly relates to the fact that we corrected sodium levels for serum glucose[9,15,17,26,30]. Among COVID-19 patients, hyponatremia appeared to have multiple etiologies, but hypovolemic hyponatremia was found to be predominant.

The incidence of hyponatremia among COVID-19 patients in this study was 34.3%, which is higher than the pooled prevalence of hyponatremia in previous systematic reviews which included studies conducted during the earlier COVID-19-waves 24% to 25.8%[7,11]. However, it aligns with Tezcan, et al. [32], Voets, et al. [39], and Sarvazad, et al. [31], who reported rates of 34%, 35.8% and 38%, respectively (the latter study included only patients without underlying disease), although even higher incidences have been reported[10,28,40-42]. The incidence of hyponatremia in COVID-19 was also found to be higher compared to hyponatremia in other types of pneumonia: 5.4% - 28%[9,13,14,39,43]. Hyponatremia is most common in pneumonias caused by viral pathogens (e.g. rhinovirus, respiratory syncytial virus, (para)influenza virus, and adenovirus) with a incidence reported of 17.6%, as compared to 13.8% in patients with bacterial pneumonias[43]. Patients presenting with hyponatremia in this study were significantly older compared to patients with normonatremia, potentially due to age-related tubular atrophy and subsequent decreased urine concentrating capacity and sodium reabsorption[44]. The fact that previous studies have identified various other underlying conditions as risk factors for hyponatremia, including cardiac[17], pulmonary[17], and liver diseases[17] possibly relates to the older age of patients with hyponatremia included (median age was 67 years in our study

1  
2  
3 versus a mean age of 74.3 years in Chan, et al. [17] and a median age of 70 years in Ruiz-Sánchez, et  
4 al. [38]).

5  
6  
7 Hypernatremia is less common among COVID-19 patients compared to other pneumonias. We  
8 found an incidence of 1.6% among COVID-19 patients. This number is lower than the incidences  
9 reported in previous studies (2.9% - 38%)[16,39] and lower than the incidence of hypernatremia (5.3%)  
10 reported in patients with a community acquired pneumonia[45]. Patients with hypernatremia were found  
11 to be older than patients with normo- or hyponatremia. These age differences were in line with the  
12 expected age-related impairment of the thirst mechanism and potential barriers to accessible fluids (e.g.  
13 due to immobilization or dementia) which could contribute to inadequate fluid intake with subsequent  
14 development of hypernatremia[25].

15  
16  
17  
18  
19  
20  
21  
22 Hyponatremia in infectious diseases can have multiple etiologies, of which SIADH,  
23 hypovolemia, and the use of diuretics are the most common, but critical illness-related corticoid  
24 insufficiency is also reported[14,22]. In this study we showed that multiple etiologies seem to play a role  
25 in COVID-19 patients. Among patients with hyponatremia a higher incidence of diarrhea and anosmia  
26 was observed. These symptoms could contribute to decreased appetite and subsequently lower dietary  
27 intake. Clinical investigations revealed an increased heart rate and slightly decreased systolic blood  
28 pressure, which suggests a possible hypovolemic state as an underlying cause for hyponatremia.  
29 Correspondingly, eGFR was lower in this group, despite comparable blood urea levels, which have been  
30 employed by others as measure to differentiate euvolemic from hypovolemic hyponatremia[29]. This  
31 hypovolemia could result from both reduced dietary intake and dehydration due to diarrhea. The low  
32 median USE (30 mmol/L) in a proportion of patients also points to extrarenal sodium loss and a  
33 hypovolemic status[46]. However, due to the limited number of patients with USE measurements, these  
34 findings should be interpreted as supportive rather than definitive evidence.

35  
36  
37  
38  
39  
40  
41  
42  
43  
44  
45  
46  
47 Moreover, patients presenting with hyponatremia had higher serum concentrations of LDH and  
48 CRP. A relationship between serum CRP and sodium concentration has been observed in other  
49 infectious diseases and has also been demonstrated in COVID-19 patients[17,28,41]. This phenomenon  
50 has been attributed to release of cytokines such as interleukin-6 and interleukin-1 $\beta$ [47], which can affect  
51 the secretion of ADH and potentially contribute to the development of SIADH[23,48]. In COVID-19  
52 patients, elevated levels of interleukin-6 and interleukin-1 $\beta$  have been noted[30,49,50]. Furthermore, a  
53 negative correlation between interleukin-6 and sodium levels has been demonstrated, implying a similar  
54  
55  
56  
57  
58  
59  
60

1  
2  
3 mechanism in the development of hyponatremia[3,29]. It is important to note that although  
4 administration of interleukin-6 receptor antagonists (tocilizumab and sarilumab) and interleukin-1  
5 receptor antagonist (anakinra) was similar between groups, this observation does not undermine the  
6  
7  
8  
9  
10  
11  
12  
13  
14  
15  
16  
17  
18  
19  
20  
21  
22  
23  
24  
25  
26  
27  
28  
29  
30  
31  
32  
33  
34  
35  
36  
37  
38  
39  
40  
41  
42  
43  
44  
45  
46  
47  
48  
49  
50  
51  
52  
53  
54  
55  
56  
57  
58  
59  
60

mechanism in the development of hyponatremia[3,29]. It is important to note that although administration of interleukin-6 receptor antagonists (tocilizumab and sarilumab) and interleukin-1 receptor antagonist (anakinra) was similar between groups, this observation does not undermine the aforementioned hypothesis, as these agents were administered based on indirect markers of interleukin release such as disease severity and CRP levels. Additionally, most patients in the study were included before registration of these agents for COVID-19 treatment, and the sample sizes of the groups might have been too small to draw definitive conclusions on the relationship between cytokine levels and hyponatremia in COVID-19 patients.

Contrary to previous studies and in contrast to patients with community acquired pneumonia, we did not find SIADH as frequent cause of hyponatremia in COVID-19 patients[8,11,30,51]. In our study, only a small proportion of USE + UOL samples complied with the definition of SIADH, and a correlation between low urinary sodium excretion and serum CRP concentration was found, which is in contrast to the theory that interleukin-6 induces ADH release (Supplemental Table 6). The overall incidence of SIADH in our study suggests that SIADH is a less frequent cause of hyponatremia among COVID-19 patients, compared to hyponatremia in patients with other pneumonias. This is possibly because COVID-19 more often causes diarrhea thereby also leading to other causes of hyponatremia. Frontera, et al. [30] reported a prevalence of 36% of SIADH among COVID-19 patients that presented with a serum sodium level  $\leq 120$  mmol/L. However, in our study population, less than 1% presented with a sodium level this low, and mild and severe hyponatremia differ in pathophysiology. Previous studies that identified SIADH as a frequent underlying mechanism of hyponatremia in COVID-19 patients based their information mostly on case reports, which likely focused on more severe cases[11]. The fact that in our study urinary investigation was not performed in all patients with hyponatremia may suggest that hyponatremia was not persistent or was otherwise not found to be severe enough to do so. This could also contribute to the lower incidence of confirmed SIADH cases in our study.

The association between thiazide diuretics and hyponatremia is well-established. Thiazide diuretics are known to increase the risk of developing hyponatremia due to their effects on renal sodium and water excretion[52]. Therefore, it is not surprising that patients with hyponatremia more frequently used thiazide diuretics. The use of immunosuppressive medications, such as glucocorticoids, was also related to hyponatremia. Glucocorticoids can potentially affect the body's water and electrolyte imbalance, including sodium levels. The development of iatrogenic adrenal insufficiency, resulting from

1  
2  
3 the (prior) prescription of steroids, can contribute to relative glucocorticoid efficiency and potentially lead  
4  
5 to hyponatremia[53,54].

6  
7 We did not find a significant association between hyponatremia and the risk of mortality or  
8  
9 intubation, although ICU admission rates were higher in the hyponatremia group. These results are in  
10  
11 line with Machiraju, et al. [41], who also demonstrated a higher need for ICU admission in COVID-19  
12  
13 patients presenting with hyponatremia but could not relate hyponatremia to mortality nor the length of  
14  
15 hospital stay. Consistent with our results, Tzoulis, et al. [29] found no significant association between  
16  
17 hyponatremia and mortality but did relate hyponatremia to invasive ventilation and the length of hospital  
18  
19 admission. The higher serum CRP and LDH concentrations in hyponatremic patients in our study  
20  
21 indicate that these patients might be more ill compared to those with normal sodium levels, which is not  
22  
23 in line with the similar mortality rates[55,56]. Moreover, 13% of all patients admitted to the ICU did not  
24  
25 receive any form of ventilatory support, suggesting that there were reasons other than respiratory failure  
26  
27 for ICU admission. The fact that this percentage was similar among patients with normonatremia  
28  
29 suggests that hyponatremia was not a frequent reason for ICU admission. We speculate that  
30  
31 dehydration accompanied by hyponatremia, along with elevated LDH and CRP levels were reasons for  
32  
33 hospital admission. However, other pathophysiologic mechanisms leading to worse outcomes were  
34  
35 absent in these patients, favoring a relatively good outcome.

36  
37 Our findings are in contrast with previous studies, in which the presence of hyponatremia at  
38  
39 presentation was independently associated with disease severity and prolonged hospital stay [17,43]  
40  
41 and was thought to be an independent predictor of hospital mortality[7,8,11,15,17]. These studies  
42  
43 suggest that hyponatremia, especially when not corrected for serum glucose concentration[57], is a  
44  
45 significant factor in determining the prognosis of patients. The observed trend towards increased  
46  
47 mortality in patients with severe hyponatremia was also demonstrated by Ruiz-Sánchez, et al. [38],  
48  
49 Chan, et al. [17], and Frontera, et al. [30]. However, the latter study obtained statistically significant  
50  
51 results with a lower number of patients (36 out of 4645, representing 1% of the population, stratified as  
52  
53 having severe hyponatremia based on sodium levels  $\leq 120$  mmol/L) compared to 1.8% in our study,  
54  
55 which could not be confirmed by our study.

56  
57 There are several potential explanations for the difference in outcomes between our study and  
58  
59 previous studies. First, previous studies only included patients that were admitted during 2020 and the  
60  
spring of 2021, the beginning of the COVID-19 pandemic[7,8,11,15,16]. In large previous studies,



1  
2  
3 mortality rates between 22.6-28.9% have been reported[9,57]. In contrast, our study included patients  
4 from the beginning of the COVID-19 pandemic until August 2022 and the overall mortality in our study  
5 was 16.7% (despite an increased risk for ICU admission and intubation for hyponatremic patients that  
6 started having complaints when the delta variant dominated). These differences in outcomes are likely  
7 attributed to increased knowledge about the disease, the development of new treatments such as  
8 dexamethasone and tocilizumab, and the commencement of widespread vaccination campaigns  
9 starting in January 2021. It is important to note that a study by Chan, et al. [17] included patients from  
10 late 2021 and early 2022 and still found an association between hyponatremia and adverse outcomes.  
11 However, these results may not be directly comparable to our study due to potential differences in  
12 vaccine efficacy and COVID-19 policies between Hong-Kong and Western countries[58]. These  
13 variations in patient cohorts and treatment strategies could influence outcomes and thus could lead to  
14 different results as compared to other studies. We speculate that the absence of a higher risk of adverse  
15 outcomes in COVID-19 patients presenting with hyponatremia, contrary to previous studies, could be  
16 partly attributed to the overall decrease in mortality as the pandemic progressed.

17  
18  
19  
20  
21  
22  
23  
24  
25  
26  
27  
28  
29  
30  
31  
32  
33  
34  
35  
36  
37  
38  
39  
40  
41  
42  
43  
44  
45  
46  
47  
48  
49  
50  
51  
52  
53  
54  
55  
56  
57  
58  
59  
60

Second, previous studies examined uncorrected sodium concentration at presentation as a prognostic factor and found increased mortality rates in patients with hyponatremia[10,11,15,26,28,30,32,38,59]. However, other studies that corrected for serum glucose concentration when these exceeded 10 mmol/L, found no significant association between hyponatremia and mortality[29]. Hirsch, et al. [57] demonstrated that the association between hyponatremia and mortality was only evident prior to correction for serum glucose concentration, and the association disappeared after correcting for glucose levels. These findings are similar to studies conducted outside the context of COVID-19[60]. In our study, uncorrected hyponatremia was associated with an elevated risk of ICU admission and intubation, whereas corrected hyponatremia did not show an association between hyponatremia and intubation. This suggests that a similar effect related to the correction of sodium levels for glucose concentration could explain the discrepancies between our study and previous studies[30,38].

The association between ICU admission and hyponatremia was most pronounced in patients with a hyponatremia of unknown etiology. However, it is important to consider that this group may include mild presentations of SIADH due to the limited number of urinary samples available. These findings align with the higher CRP and LDH levels observed in this group. Patients that had a history of

1  
2  
3 gastro-intestinal symptoms had a lower risk of ICU admission, despite having higher levels of CRP and  
4 LDH levels. The higher CRP and LDH levels in this group could not be related to the SARS-CoV-2  
5 variants, as the highest CRP levels were observed in patients that developed symptoms during a period  
6 in which the delta variant dominated. Notably, this group also had the lowest prevalence of gastro-  
7 intestinal symptoms (data not shown). We suggest that the prevalence of SIADH in our study group was  
8 very low for two reasons. Firstly, we included patients during later COVID-19 waves (when alpha, delta,  
9 and omicron variants dominated), whereas patients with hyponatremia due to SIADH that was severe  
10 enough to perform urinary analysis presented mostly during the period where initial variants dominated.  
11 This could have resulted in a lower prevalence that studies that only included patients during the first  
12 COVID-19 wave. Secondly, SIADH can only be diagnosed based on urinary sodium excretion and  
13 urinary osmolarity, but only a limited number of urinary samples was available, so we were not able to  
14 provide a precise estimate.  
15

16  
17  
18 In contrast to the findings in patients with hyponatremia, our study revealed a significant  
19 association between hypernatremia and adverse outcomes such as ICU-admission, intubation, and  
20 death. While there were no significant differences in serum CRP and LDH concentration, as well as CT-  
21 severity scores at admission, between hypernatremic and normonatremic patients, higher MEWS and  
22 qSOFA scores indicated that a greater extent of lung tissue in hypernatremic patients. Furthermore,  
23 elevated serum urea concentration, lower eGFR, and a prolonged capillary refill time suggested  
24 dehydration in this group of patients. These findings collectively point towards a more severely ill patient  
25 population, which could account for the worse clinical outcomes observed. The association between  
26 hypernatremia and worse clinical outcomes has been previously documented in COVID-19[15,19] and  
27 other type of pneumonias[45].  
28

29  
30  
31 Our study on hyponatremia in COVID-19 is characterized by its large size, including over 7000  
32 patients from various hospitals across Netherlands. A notable strength of our study lies in the inclusion  
33 of patients from different waves of the COVID-19 and from multiple hospitals, both university and  
34 general. This approach resulted in a diverse patient population, making our findings applicable to the  
35 current situation. Furthermore, our study benefitted from the availability of a large amount of clinical data  
36 being available for each patient. This allowed us to analyze the associations we discovered in  
37 conjunction with relevant patient background details. For instance, we had access to vital signs recorded  
38 at admission, providing us with a more comprehensive understanding of the patients' condition upon  
39  
40  
41  
42  
43  
44  
45  
46  
47  
48  
49  
50  
51  
52  
53  
54  
55  
56  
57  
58  
59  
60

1  
2  
3 admission compared to previous studies[30,38]. Consequently, we were able to offer more  
4 substantiated insights into the presumed underlying etiology and how the different etiologies were  
5 related to clinical outcomes.  
6  
7

8  
9 This study has several limitations that should be acknowledged. Firstly, the availability of urinary  
10 samples of patients with hyponatremia (185 out of the total) limits the generalizability of our findings.  
11 Additionally, information on the duration of hyponatremia in participating patients was not provided.  
12 Exploring these aspects would have been valuable, as a previous study by de La Flor, et al. [61]  
13 demonstrated that persistent hyponatremia (72 – 96h after admission) was associated with higher  
14 mortality in COVID-19 patients. Secondly, the variability in treatment protocols among the participating  
15 hospital may have influenced outcome of patients in our study. Lastly, we were unable to study specific  
16 treatment options for hyponatremia in patients.  
17  
18  
19  
20  
21  
22  
23

24 Our results suggest that while hyponatremia is commonly observed among COVID-19 patients,  
25 it is not associated with adverse clinical outcome. However, the presence of hypernatremia should be  
26 of concern to clinicians, as it is indicative of a poorer prognosis. To enhance our understanding of the  
27 etiology of hyponatremia in COVID-19, future studies should focus on monitoring the clinical course of  
28 hyponatremia during hospitalization, documenting the duration of hyponatremia, and recording the  
29 treatment administered. It is crucial to obtain urinary samples from all patients presenting with COVID-  
30 19 and hyponatremia to further elucidate the underlying causes. Moreover, further research is warranted  
31 to investigate the incidence and potential mechanisms of SIADH in relation to disease severity and  
32 inflammation. More specifically, studies examining the relationship with interleukin-6 would be valuable,  
33 given that the interleukin-6 antagonist tocilizumab is used in the treatment of patients with moderate to  
34 severe COVID-19.  
35  
36  
37  
38  
39  
40  
41  
42  
43  
44  
45  
46  
47  
48  
49  
50  
51  
52  
53  
54  
55  
56  
57  
58  
59  
60

## 5. Conclusion

Hyponatremia is a common electrolyte disorder found in one third of patients hospitalized with COVID-19. Several risk factors have been identified, including male sex assigned at birth, a slightly lower BMI, pre-existing conditions like chronic kidney disease, hypertension, as well as the use of certain medications such as the use of thiazide diuretics and immunosuppressives. We found that hyponatremia was not associated with a higher need for invasive ventilation nor with mortality. In contrast, hypernatremia was associated with worse outcomes as compared to normonatremia. Regarding the underlying pathophysiological mechanisms, hypovolemic hyponatremia appeared to be the predominant mechanism in COVID-19 patients. Other causes of hyponatremia, such as SIADH, were less commonly observed in our study population.

## Contributorship Statement

LRdH, MtW, and RAD conceptualized and designed the study, and were responsible for the planning, conduct, data analysis and interpretation. LRdH drafted the article supervised by MtW, and RAD. Figures and tables were designed by LRdH. LRdH, MtW, RAD, MB, RHOE, BA, EKHH, DR, NCGvdO, SS, NP, JPvdB, CEW, MdK, TD, HM, NB, and KB were responsible for the inclusion of patients and data entry in the COVID-PREDICT database in their respective centers on behalf of the COVID-PREDICT study group. MB, RHOE, BA, EKHH, DR, NCGvdO, SS, NP, JPvdB, CEW, MdK, TD, HM, NB, and KB critically revised the manuscript and supplemental material. All authors provided final approval of the manuscript and accepted responsibility for the integrity and accuracy of the work. They also ensured that any inquiries regarding the work's integrity or accuracy would be thoroughly investigated and resolved.

## Competing of interest

The authors declare that there is no conflict of interest.

## Funding

This research received no specific grant from any funding agency in the public, commercial, or not-for-profit sectors.

## Data sharing statement

No data are available. Not all patients provided active informed consent, and therefore sharing data is not possible.

## Ethics approval

The ethical board of the Amsterdam University Medical Centers (20.131) approved the study protocol.

## Acknowledgements

We want to acknowledge the contribution of the CovidPredict working group, including the clinicians that contributed to data collection and the students responsible for data entry, and we would like to acknowledge E. Martens for his help with the analysis.

## References

1. Chen N, Zhou M, Dong X, et al. Epidemiological and clinical characteristics of 99 cases of 2019 novel coronavirus pneumonia in Wuhan, China: a descriptive study. *Lancet* 2020;395(10223):507-13. doi: 10.1016/s0140-6736(20)30211-7 [published Online First: 2020/02/03]
2. Horby P, Lim WS, Emberson JR, et al. Dexamethasone in Hospitalized Patients with Covid-19 - Preliminary Report. *N Engl J Med* 2020 doi: 10.1056/NEJMoa2021436 [published Online First: 2020/07/18]
3. Berni A, Malandrino D, Parenti G, et al. Hyponatremia, IL-6, and SARS-CoV-2 (COVID-19) infection: may all fit together? *J Endocrinol Invest* 2020;43(8):1137-39. doi: 10.1007/s40618-020-01301-w [published Online First: 2020/05/27]
4. Wu Y, Hou B, Liu J, et al. Risk Factors Associated With Long-Term Hospitalization in Patients With COVID-19: A Single-Centered, Retrospective Study. *Front Med (Lausanne)* 2020;7:315. doi: 10.3389/fmed.2020.00315 [published Online First: 2020/06/26]
5. COVID-PREDICT-werkgroep. Klinisch beloop van covid-19 in Nederland. *NTVG* 2021;165
6. Malieckal DA, Uppal NN, Ng JH, et al. Electrolyte abnormalities in patients hospitalized with COVID-19. *Clin Kidney J* 2021;14(6):1704-07. doi: 10.1093/ckj/sfab060 [published Online First: 2021/06/04]
7. Akbar MR, Pranata R, Wibowo A, et al. The Prognostic Value of Hyponatremia for Predicting Poor Outcome in Patients With COVID-19: A Systematic Review and Meta-Analysis. *Front Med (Lausanne)* 2021;8:666949. doi: 10.3389/fmed.2021.666949 [published Online First: 2021/07/02]

- 1
  - 2
  - 3
  - 4
  - 5
  - 6
  - 7
  - 8
  - 9
  - 10
  - 11
  - 12
  - 13
  - 14
  - 15
  - 16
  - 17
  - 18
  - 19
  - 20
  - 21
  - 22
  - 23
  - 24
  - 25
  - 26
  - 27
  - 28
  - 29
  - 30
  - 31
  - 32
  - 33
  - 34
  - 35
  - 36
  - 37
  - 38
  - 39
  - 40
  - 41
  - 42
  - 43
  - 44
  - 45
  - 46
  - 47
  - 48
  - 49
  - 50
  - 51
  - 52
  - 53
  - 54
  - 55
  - 56
  - 57
  - 58
  - 59
  - 60
8. Ayus JC, Kalantar-Zadeh K, Tantisattamo E, et al. Is hyponatremia a novel marker of inflammation in patients with COVID 19? *Nephrol Dial Transplant* 2023 doi: 10.1093/ndt/gfad111 [published Online First: 2023/05/28]
9. Liu D, Mowrey W, Fisher M, et al. Associations of Dysnatremia with COVID-19 Status and Mortality. *Kidney360* 2022;3(8):1323-31. doi: 10.34067/kid.0001062022 [published Online First: 2022/10/01]
10. Islam MK, Hasan P, Sharif MM, et al. Hyponatremia in COVID-19 patients: Experience from Bangladesh. *Health Sci Rep* 2022;5(2):e565. doi: 10.1002/hsr2.565 [published Online First: 2022/03/22]
11. Khidir RJY, Ibrahim BAY, Adam MHM, et al. Prevalence and outcomes of hyponatremia among COVID-19 patients: A systematic review and meta-analysis. *Int J Health Sci (Qassim)* 2022;16(5):69-84. [published Online First: 2022/09/15]
12. Upadhyay A, Jaber BL, Madias NE. Incidence and prevalence of hyponatremia. *Am J Med* 2006;119(7 Suppl 1):S30-5. doi: 10.1016/j.amjmed.2006.05.005 [published Online First: 2006/07/18]
13. Gustafson BD, Zhao Y, Milkovits AE, et al. Incidence of Hyponatremia Among Critically Ill Patients With and Without COVID-19 Infection at a Community Teaching Hospital. *J Intensive Care Med* 2023;8850666231170760. doi: 10.1177/08850666231170760 [published Online First: 2023/04/20]
14. Liamis G, Milionis HJ, Elisaf M. Hyponatremia in patients with infectious diseases. *J Infect* 2011;63(5):327-35. doi: 10.1016/j.jinf.2011.07.013 [published Online First: 2011/08/13]
15. Królicka A, Letachowicz K, Adamik B, et al. Dysnatremia in COVID-19 Patients-An Analysis of the COLOS Study. *J Clin Med* 2023;12(8) doi: 10.3390/jcm12082802 [published Online First: 2023/04/28]
16. Tzoulis P, Grossman AB, Baldeweg SE, et al. MANAGEMENT OF ENDOCRINE DISEASE: Dysnatraemia in COVID-19: prevalence, prognostic impact, pathophysiology, and management. *Eur J Endocrinol* 2021;185(4):R103-r11. doi: 10.1530/eje-21-0281 [published Online First: 2021/08/10]
17. Chan GCK, Wong CK, So BYF, et al. Epidemiology and outcomes of hyponatremia in patients with COVID-19-A territory-wide study in Hong Kong. *Front Med (Lausanne)* 2022;9:1096165. doi: 10.3389/fmed.2022.1096165 [published Online First: 2023/01/31]
18. Genovesi S, Regolisti G, Rebora P, et al. Negative prognostic impact of electrolyte disorders in patients hospitalized for Covid-19 in a large multicenter study. *J Nephrol* 2023;36(3):621-26. doi: 10.1007/s40620-022-01429-3 [published Online First: 2022/08/25]
19. Shrestha AB, Sapkota UH, Shrestha S, et al. Association of hypernatremia with outcomes of COVID-19 patients: A protocol for systematic review and meta-analysis. *Medicine (Baltimore)* 2022;101(51):e32535. doi: 10.1097/md.00000000000032535 [published Online First: 2023/01/04]
20. Sabaghian T, Honarvar M, Safavi-Naini SAA, et al. Effect of Electrolyte Imbalance on Mortality and Late Acute Kidney Injury in Hospitalized COVID-19 Patients. *Iran J Kidney Dis* 2022;16(4):228-37. [published Online First: 2022/08/14]
21. Rondon-Berrios H, Agaba EI, Tzamaloukas AH. Hyponatremia: pathophysiology, classification, manifestations and management. *Int Urol Nephrol* 2014;46(11):2153-65. doi: 10.1007/s11255-014-0839-2 [published Online First: 2014/09/25]
22. Honore PM, Redant S, Preseau T, et al. Understanding the Underlying Mechanisms of Hyponatremia in Coronavirus Disease 2019 Is Critical Since Treatment Varies Based on Etiology: Let Us Not Forget Critical Illness-Related Corticosteroid Insufficiency

- 1  
2  
3 As the Treatment Is Very Different and Often Lifesaving! *Crit Care Med*  
4 2021;49(7):e724-e25. doi: 10.1097/ccm.0000000000005006 [published Online First:  
5 2021/04/20]  
6  
7 23. Hodax JK, Bialo SR, Yalcindag A. SIADH in Systemic JIA Resolving After Treatment  
8 With an IL-6 Inhibitor. *Pediatrics* 2018;141(1) doi: 10.1542/peds.2016-4174  
9 [published Online First: 2017/12/16]  
10  
11 24. Salama C, Han J, Yau L, et al. Tocilizumab in Patients Hospitalized with Covid-19  
12 Pneumonia. *N Engl J Med* 2021;384(1):20-30. doi: 10.1056/NEJMoa2030340  
13 [published Online First: 2020/12/18]  
14  
15 25. Kugler JP, Husted T. Hyponatremia and hypernatremia in the elderly. *Am Fam Physician*  
16 2000;61(12):3623-30. [published Online First: 2000/07/13]  
17  
18 26. Hu W, Lv X, Li C, et al. Disorders of sodium balance and its clinical implications in  
19 COVID-19 patients: a multicenter retrospective study. *Intern Emerg Med*  
20 2021;16(4):853-62. doi: 10.1007/s11739-020-02515-9 [published Online First:  
21 2020/10/17]  
22  
23 27. Martino M, Falcioni P, Giancola G, et al. Sodium alterations impair the prognosis of  
24 hospitalized patients with COVID-19 pneumonia. *Endocr Connect* 2021;10(10):1344-  
25 51. doi: 10.1530/ec-21-0411 [published Online First: 2021/09/18]  
26  
27 28. Ayus JC, Negri AL, Moritz ML, et al. Hyponatremia, Inflammation at Admission, and  
28 Mortality in Hospitalized COVID-19 Patients: A Prospective Cohort Study. *Front*  
29 *Med (Lausanne)* 2021;8:748364. doi: 10.3389/fmed.2021.748364 [published Online  
30 First: 2021/12/21]  
31  
32 29. Tzoulis P, Waung JA, Bagkeris E, et al. Dysnatremia is a Predictor for Morbidity and  
33 Mortality in Hospitalized Patients with COVID-19. *J Clin Endocrinol Metab*  
34 2021;106(6):1637-48. doi: 10.1210/clinem/dgab107 [published Online First:  
35 2021/02/25]  
36  
37 30. Frontera JA, Valdes E, Huang J, et al. Prevalence and Impact of Hyponatremia in Patients  
38 With Coronavirus Disease 2019 in New York City. *Crit Care Med*  
39 2020;48(12):e1211-e17. doi: 10.1097/ccm.0000000000004605 [published Online  
40 First: 2020/08/23]  
41  
42 31. Sarvazad H, Cahngaripour SH, Eskandari Roozbahani N, et al. Evaluation of electrolyte  
43 status of sodium, potassium and magnesium, and fasting blood sugar at the initial  
44 admission of individuals with COVID-19 without underlying disease in Golestan  
45 Hospital, Kermanshah. *New Microbes New Infect* 2020;38:100807. doi:  
46 10.1016/j.nmni.2020.100807 [published Online First: 2020/12/10]  
47  
48 32. Tezcan ME, Dogan Gokce G, Sen N, et al. Baseline electrolyte abnormalities would be  
49 related to poor prognosis in hospitalized coronavirus disease 2019 patients. *New*  
50 *Microbes New Infect* 2020;37:100753. doi: 10.1016/j.nmni.2020.100753 [published  
51 Online First: 2020/09/10]  
52  
53 33. Prokop M, van Everdingen W, van Rees Vellinga T, et al. CO-RADS: A Categorical CT  
54 Assessment Scheme for Patients Suspected of Having COVID-19-Definition and  
55 Evaluation. *Radiology* 2020;296(2):E97-e104. doi: 10.1148/radiol.2020201473  
56 [published Online First: 2020/04/28]  
57  
58 34. Hillier TA, Abbott RD, Barrett EJ. Hyponatremia: evaluating the correction factor for  
59 hyperglycemia. *Am J Med* 1999;106(4):399-403. doi: 10.1016/s0002-9343(99)00055-  
60 8 [published Online First: 1999/05/04]  
35. Inker LA, Eneanya ND, Coresh J, et al. New Creatinine- and Cystatin C-Based Equations  
to Estimate GFR without Race. *N Engl J Med* 2021;385(19):1737-49. doi:  
10.1056/NEJMoa2102953 [published Online First: 2021/09/24]

- 1  
2  
3 36. Environment NifPHat. Variants of the coronavirus SARS-CoV-2. <https://www.rivm.nl>  
4 2023
- 5 37. van der Woude SW, van Doormaal FF, Hutten BA, et al. Classifying sepsis patients in the  
6 emergency department using SIRS, qSOFA or MEWS. *Neth J Med* 2018;76(4):158-  
7 66. [published Online First: 2018/05/31]
- 8 38. Ruiz-Sánchez JG, Núñez-Gil IJ, Cuesta M, et al. Prognostic Impact of Hyponatremia and  
9 Hypertatremia in COVID-19 Pneumonia. A HOPE-COVID-19 (Health Outcome  
10 Predictive Evaluation for COVID-19) Registry Analysis. *Front Endocrinol*  
11 (*Lausanne*) 2020;11:599255. doi: 10.3389/fendo.2020.599255 [published Online  
12 First: 2020/12/18]
- 13 39. Voets PJ, Frölke SC, Vogtländer NP, et al. COVID-19 and dysnatremia: A comparison  
14 between COVID-19 and non-COVID-19 respiratory illness. *SAGE Open Med*  
15 2021;9:20503121211027778. doi: 10.1177/20503121211027778 [published Online  
16 First: 2021/07/16]
- 17 40. Taci Hoca N, Berktaş BM. Baseline electrolyte disorders predict disease severity and  
18 mortality in patients with COVID-19. *Medicine (Baltimore)* 2022;101(51):e32397.  
19 doi: 10.1097/md.00000000000032397 [published Online First: 2023/01/04]
- 20 41. Machiraju PK, Alex NM, Safinaaz, et al. Hyponatremia in Coronavirus Disease-19  
21 Patients: A Retrospective Analysis. *Can J Kidney Health Dis*  
22 2021;8:20543581211067069. doi: 10.1177/20543581211067069 [published Online  
23 First: 2022/01/11]
- 24 42. Sjöström A, Rysz S, Sjöström H, et al. Electrolyte and acid-base imbalance in severe  
25 COVID-19. *Endocr Connect* 2021;10(7):805-14. doi: 10.1530/ec-21-0265 [published  
26 Online First: 2021/06/23]
- 27 43. Królicka AL, Kruczkowska A, Krajewska M, et al. Hyponatremia in Infectious Diseases-  
28 A Literature Review. *Int J Environ Res Public Health* 2020;17(15) doi:  
29 10.3390/ijerph17155320 [published Online First: 2020/07/29]
- 30 44. Chang-Panesso M. Acute kidney injury and aging. *Pediatr Nephrol* 2021;36(10):2997-  
31 3006. doi: 10.1007/s00467-020-04849-0 [published Online First: 2021/01/08]
- 32 45. Tokgöz Akyıl F, Akyıl M, Çoban Ağca M, et al. Hyponatremia prolongs hospital stay and  
33 hypertatremia better predicts mortality than hyponatremia in hospitalized patients  
34 with community-acquired pneumonia. *Tuberk Toraks* 2019;67(4):239-47. doi:  
35 10.5578/tt.68779 [published Online First: 2020/02/14]
- 36 46. Spasovski G, Vanholder R, Allolio B, et al. Clinical practice guideline on diagnosis and  
37 treatment of hyponatraemia. *Intensive Care Med* 2014;40(3):320-31. doi:  
38 10.1007/s00134-014-3210-2 [published Online First: 2014/02/25]
- 39 47. Park SJ, Shin JI. Inflammation and hyponatremia: an underrecognized condition? *Korean*  
40 *J Pediatr* 2013;56(12):519-22. doi: 10.3345/kjp.2013.56.12.519 [published Online  
41 First: 2014/01/15]
- 42 48. Nogueira GM, Silva N, Moura AF, et al. Acute kidney injury and electrolyte disorders in  
43 COVID-19. *World J Virol* 2022;11(5):283-92. doi: 10.5501/wjv.v11.i5.283 [published  
44 Online First: 2022/10/04]
- 45 49. Leaf DE, Gupta S, Wang W. Tocilizumab in Covid-19. *N Engl J Med* 2021;384(1):86-87.  
46 doi: 10.1056/NEJMc2032911 [published Online First: 2020/12/29]
- 47 50. Soy M, Keser G, Atagündüz P, et al. Cytokine storm in COVID-19: pathogenesis and  
48 overview of anti-inflammatory agents used in treatment. *Clin Rheumatol*  
49 2020;39(7):2085-94. doi: 10.1007/s10067-020-05190-5 [published Online First:  
50 2020/06/01]
- 51 51. Cuesta M, Slattery D, Goulden EL, et al. Hyponatraemia in patients with community-  
52 acquired pneumonia; prevalence and aetiology, and natural history of SIAD. *Clin*  
53  
54  
55  
56  
57  
58  
59  
60



- 1  
2  
3 *Endocrinol (Oxf)* 2019;90(5):744-52. doi: 10.1111/cen.13937 [published Online First:  
4 2019/01/19]
- 5 52. Filippone EJ, Ruzieh M, Foy A. Thiazide-Associated Hyponatremia: Clinical  
6 Manifestations and Pathophysiology. *Am J Kidney Dis* 2020;75(2):256-64. doi:  
7 10.1053/j.ajkd.2019.07.011 [published Online First: 2019/10/14]
- 8 53. Garrahy A, Thompson CJ. Hyponatremia and Glucocorticoid Deficiency. *Front Horm Res*  
9 2019;52:80-92. doi: 10.1159/000493239 [published Online First: 2020/02/26]
- 10 54. Rodríguez Virgili J, Cabal García AA. [Iatrogenic adrenal insufficiency]. *Semergen*  
11 2012;38(7):468-71. doi: 10.1016/j.semERG.2011.10.005 [published Online First:  
12 2012/10/02]
- 13 55. Li K, Wu J, Wu F, et al. The Clinical and Chest CT Features Associated With Severe and  
14 Critical COVID-19 Pneumonia. *Invest Radiol* 2020;55(6):327-31. doi:  
15 10.1097/rli.0000000000000672 [published Online First: 2020/03/03]
- 16 56. Salvatore C, Roberta F, Angela L, et al. Clinical and laboratory data, radiological  
17 structured report findings and quantitative evaluation of lung involvement on baseline  
18 chest CT in COVID-19 patients to predict prognosis. *Radiol Med* 2020:1-11. doi:  
19 10.1007/s11547-020-01293-w [published Online First: 2020/10/14]
- 20 57. Hirsch JS, Uppal NN, Sharma P, et al. Prevalence and outcomes of hyponatremia and  
21 hypernatremia in patients hospitalized with COVID-19. *Nephrol Dial Transplant*  
22 2021;36(6):1135-38. doi: 10.1093/ndt/gfab067 [published Online First: 2021/03/17]
- 23 58. Graña C, Ghosn L, Evrenoglou T, et al. Efficacy and safety of COVID-19 vaccines.  
24 *Cochrane Database Syst Rev* 2022;12(12):Cd015477. doi:  
25 10.1002/14651858.Cd015477 [published Online First: 2022/12/07]
- 26 59. Atila C, Sailer CO, Bassetti S, et al. Prevalence and outcome of dysnatremia in patients  
27 with COVID-19 compared to controls. *Eur J Endocrinol* 2021;184(3):409-18. doi:  
28 10.1530/eje-20-1374 [published Online First: 2021/01/16]
- 29 60. Waikar SS, Mount DB, Curhan GC. Mortality after hospitalization with mild, moderate,  
30 and severe hyponatremia. *Am J Med* 2009;122(9):857-65. doi:  
31 10.1016/j.amjmed.2009.01.027 [published Online First: 2009/08/25]
- 32 61. de La Flor JC, Gomez-Berrocal A, Marschall A, et al. The impact of the correction of  
33 hyponatremia during hospital admission on the prognosis of SARS-CoV-2 infection.  
34 *Med Clin (Engl Ed)* 2022;159(1):12-18. doi: 10.1016/j.medcle.2021.07.021 [published  
35 Online First: 2022/07/06]
- 36  
37  
38  
39  
40  
41  
42  
43  
44  
45  
46  
47  
48  
49  
50  
51  
52  
53  
54  
55  
56  
57  
58  
59  
60

## Figure legends

**Figure 1.** Hazard ratios of cox proportional survival curves for survival probability for each sodium value adjusted for age, sex assigned at birth, a history of chronic kidney disease, and a history of hypertension. The grey area indicates the normonatremia. Table shows hazard ratios for covariates and sodium as a continuous variable **(A)**. Cox proportional survival curves at the mean of covariates for **(B)** unadjusted 6-week mortality stratified by normo-, hypo-, and hypernatremia, **(C)** 6-week mortality adjusted for age, sex assigned at birth, a history of chronic kidney disease, and a history of hypertension stratified in normo-, hypo-, and hypernatremia, **(D)** Unadjusted 6-week mortality stratified by etiology. \*\* indicates a p-value <0.01, \*\*\* indicates a p-value <0.001

**Figure 2.** Odds ratio for adverse outcomes (death / palliative discharge **(A)**, intensive care unit admission **(B)** invasive ventilation **(C)**) for each SARS-CoV-2 variant compared to patients in that started having symptoms when the initial variants for patients with hypo-, hyper-, or normonatremia at admission. \*\*\* indicates a p-value <0.001 for the odds ratio as calculated by binary logistic regression. **(D)** incidence of hypo-, normo-, and hypernatremia for each variant, \* indicates a p-value <0.05 as compared to the first quartile for the chi-square statistic with Bonferroni post-hoc correction.

**Table 1** – Comparison of patient characteristics between COVID-19 patients with hypo-, normo-, and hypernatremia

|                                             | <b>Hyponatremia</b><br>Na 134 mmol/L<br>N = 2677     | <b>Normonatremia</b><br>Na 136 – 145 mmol/L<br>N = 5008 | <b>Hypernatremia</b><br>Na 146 mmol/L<br>N = 126     |
|---------------------------------------------|------------------------------------------------------|---------------------------------------------------------|------------------------------------------------------|
| Sex assigned at birth (N (%))               | ♂ 1673 (62.5%)<br>♀ 1003 (37.5%)<br><b>p = 0.002</b> | ♂ 2946 (58.8 %)<br>♀ 2060 (41.2 %)                      | ♂ 84 (66.7%)<br>♀ 42 (33.3%)                         |
| Age (median age in years (IQR))             | N = 2675<br>67.0 (58.0-77.0)<br><b>p &lt; 0.001</b>  | N = 5008<br>66.1 (55.0-76.0)                            | N = 126<br>72.5 (62.8 – 80.3)<br><b>p &lt; 0.001</b> |
| BMI (median BMI in kg/m <sup>2</sup> (IQR)) | N = 1740<br>27.2 (24.2 – 31.1)<br><b>p = 0.009</b>   | N = 3374<br>27.7 (24.6 – 31.6)                          | N = 91<br>25.0 (22.2 – 29.1)<br><b>p &lt; 0.001</b>  |
| Order 'Do not intubate' (N (%))             | 440 / 1442 (30.5 %)                                  | 796 / 2469 (32.2 %)                                     | 39 / 77 (50.6 %)<br><b>p = 0.004</b>                 |
| Chronic cardiac disease (N (%))             | 760 / 2666 (28.5%)<br>p = 0.07                       | 1334 / 4982 (26.8 %)                                    | 42 / 123 (34.1 %)<br>p = 0.07                        |
| Hypertension (N (%))                        | 1055 / 2374 (44.4 %)<br><b>p = 0.002</b>             | 1889 / 4586 (41.2 %)                                    | 64 / 120 (53.3 %)                                    |
| Chronic pulmonary disease (N (%))           | 466 / 2662 (17.5 %)<br>p = 0.75                      | 844 / 4979 (17.0 %)                                     | 19 / 122 (15.6 %)<br>p = 0.75                        |
| Chronic kidney disease (N (%))              | 329 / 2379 (13.8 %)<br><b>p &lt; 0.001</b>           | 491 / 4587 (10.7 %)                                     | 26 / 121 (21.5 %)<br><b>p &lt; 0.001</b>             |
| Moderate to severe liver disease (N (%))    | 30 / 2662 (1.1 %)<br>p = 0.46                        | 50 / 4972 (1.0 %)                                       | 0 / 123 (0.0 %)<br>p = 0.46                          |
| Diabetes (N (%))                            | 664 / 2662 (24.9 %)<br>p = 0.39                      | 1261 / 4972 (25.4 %)                                    | 38 / 125 (30.4 %)<br>p = 0.39                        |
| Immunosuppressives (N (%))                  | 192 / 2283 (8.4 %)<br><b>p = 0.002</b>               | 295 / 4445 (6.6 %)                                      | 2 / 118 (1.7 %)                                      |
| Thiazide diuretics (N (%))                  | 258 / 2671 (9.7 %)<br><b>p = 0.015</b>               | 394 / 4994 (7.9 %)                                      | 7 / 125 (5.6 %)                                      |
| Loop diuretics (N (%))                      | 187 / 2671 (7.0 %)<br>p = 0.22                       | 389 / 4994 (7.8 %)                                      | 13 / 125 (10.4 %)<br>p = 0.22                        |
| SSRIs / SNRIs (N (%))                       | 78 / 2671 (2.9 %)<br>p = 0.69                        | 164 / 4994 (3.3 %)                                      | 4 / 125 (3.2 %)<br>p = 0.69                          |

BMI = body mass index; IQR = interquartile range; % = percentage of patients in this group with indicated characteristic; SSRI = Selective Serotonin Reuptake inhibitor; SNRI = Selective Serotonin and Noradrenalin Reuptake inhibitor. Significance was assessed using a Kruskal-Wallis test with post-hoc correction (for numerical data; non-normally distributed) or Chi-square test (for categorical data). p – values for all groups indicate the adjusted significance after post-hoc correction when compared to the normonatremia group. When no p – value was provided there was no significant difference compared to the normonatremia group. Subgroup analyses for hyponatremia is provided in the supplemental information.

**Table 2** – Comparison of signs and symptoms at presentation between COVID-19 patients with hypo-, normo-, and hypernatremia

| Signs and symptoms                                                                                         | Hyponatremia<br>Na 134 mmol/L<br>N = 2677  | Normonatremia<br>Na 136 – 145 mmol/L<br>N = 5008 | Hypernatremia<br>Na 146 mmol/L<br>N = 126 |
|------------------------------------------------------------------------------------------------------------|--------------------------------------------|--------------------------------------------------|-------------------------------------------|
| Nausea / vomiting (N (%))                                                                                  | 679 / 2273 (29.9 %)<br>p = 0.04            | 1150 / 4129 (27.9 %)                             | 16 / 83 (19.3 %)<br>p = 0.04              |
| Diarrhea (N (%))                                                                                           | 804 / 2298 (35.0%)<br>p < 0.001            | 1146 / 4157 (27.6 %)                             | 15 / 82 (18.3 %)                          |
| Anosmia (N (%))                                                                                            | 244 / 1904 (12.8 %)<br>p = 0.002           | 352 / 3330 (10.6 %)                              | 1 / 66 (1.5 %)                            |
| Confusion (N (%))                                                                                          | 311 / 2319 (13.4%)                         | 651 / 4381 (14.9 %)                              | 45 / 105 (42.9 %)<br>p < 0.001            |
| Seizures (N (%))                                                                                           | 10 / 1977 (0.5%)<br>p = 0.20               | 31 / 3452 (0.9 %)                                | 0 / 80 (0.0 %)<br>p = 0.20                |
| FiO2 (median fraction (IQR))                                                                               | N = 1159<br>0.36 (0.28-0.50)<br>p = 0.05   | N = 2084<br>0.36 (0.28 – 0.50)                   | N = 67<br>0.44 (0.30 – 0.80)<br>p = 0.05  |
| SBP (mean SBP in mmHg (SD))                                                                                | N = 2648<br>132 (± 22)<br>p < 0.001        | N = 4971<br>135 (±23)                            | N = 120<br>135 (± 25)<br>p = 1.00         |
| HR (mean HR in BPM (SD))                                                                                   | N = 2661<br>92 (±18)<br>p = 0.003          | N = 4965<br>91 (±20)                             | N = 123<br>95 (±25)<br>p = 0.034          |
| Capillary refill ≥3 s (N (%))                                                                              | 81 / 863 (9.4 %)                           | 93 / 1369 (6.8 %)                                | 6 / 33 (18.2 %)<br>p = 0.008              |
| Blood urea level (median level n mmol/L (IQR))                                                             | N = 2549<br>6.3 (4.5 – 9.3)<br>p = 0.87    | N = 4776<br>6.2 (4.5 – 9.2)                      | N = 115<br>12.6 (7.9 – 25.3)<br>p < 0.000 |
| eGFR rate using 2021 CKD-epi creatinine equation in (median clearance in ml/min/1.73 m <sup>3</sup> (IQR)) | N = 2656<br>64 (45 – 90)<br>p < 0.001      | N = 4983<br>68 (46 – 94)                         | N = 125<br>41 (24 – 71)<br>p < 0.001      |
| CT-severity score (mean score (SD))                                                                        | N = 909<br>12.4 (±5.5)<br>p = 0.58         | N = 1401<br>12.1 (±5.6)                          | N = 30<br>14.5 (±7.2)<br>p = 0.06         |
| Blood CRP level (median level in mg/L (IQR))                                                               | N = 2646<br>93.1 (49.0 – 154)<br>p < 0.001 | N = 4939<br>70.8 (28.0 – 131)                    | N = 123<br>75.0 (29.0 – 148)<br>P = 1.00  |
| Blood LDH level (median level in U/L (IQR))                                                                | N = 2238<br>349 (268 – 471)<br>p < 0.001   | N = 4226<br>323 (247 – 426)                      | N = 89<br>363 (255 – 447)<br>p = 0.52     |

|                            |                                                    |                             |                                                   |
|----------------------------|----------------------------------------------------|-----------------------------|---------------------------------------------------|
| MEWS (median score (IQR))  | N = 2337<br>3.0 (2.0 – 4.0)<br><b>p &lt; 0.001</b> | N = 4055<br>3.0 (2.0 – 4.0) | N = 103<br>4.0 (2.0 – 5.0)<br><b>p &lt; 0.001</b> |
| qSOFA (median score (IQR)) | N = 2373<br>1.0 (0.0 – 1.0)<br>p = 1.00            | N = 4131<br>1.0 (0.0 – 1.0) | N = 104<br>1.0 (1.0 – 1.0)<br><b>p &lt; 0.001</b> |

SBP = systolic blood pressure; HR = heart rate; eGFR = estimated glomerular filtration rate; CKD-epi = chronic kidney disease Epidemiology Collaboration; CT = computed tomography; BPM = beats per minute; IQR = interquartile range; SD = standard deviation; CRP = c-reactive protein; LDH = lactate dehydrogenase; MEWS = modified early warning score; qSOFA = quick sequential organ failure assessment. % = percentage of patients in this group with indicated characteristic. Significance was assessed using a Kruskal-Wallis test with post-hoc correction (for numerical data) or Chi-square test (for categorical data). p – values for all groups indicate significance when compared to the normonatremia group. When no p – value was provided there was no significant difference to the normonatremia group. Subgroup analyses for hyponatremia is provided in the supplemental information.

**Table 3** – Comparison of clinical outcomes between COVID-19 patients with hypo-, normo-, and hypernatremia

| Outcome                                                                          | Hyponatremia<br>Na 134 mmol/L<br>N = 2677                               | Normonatremia<br>Na 136 – 145 mmol/L<br>N = 5008 | Hypernatremia<br>Na 146 mmol/L<br>N = 126                            |
|----------------------------------------------------------------------------------|-------------------------------------------------------------------------|--------------------------------------------------|----------------------------------------------------------------------|
| Duration of admission (median days (IQR))                                        | N = 2372<br>7 (4 – 16)<br>p < 0.001                                     | N = 4116<br>7 (3 – 14)                           | N = 103<br>8 (4 – 15)<br>P = 0.998                                   |
| Death or palliative discharge (N (%))                                            | 405 / 2360 (17.2 %)<br><sup>A</sup> OR 1.04 (0.91 – 1.20)<br>p = 0.56   | 729 / 4568 (16.0 %)                              | 42 / 119 (35.3 %)<br><sup>A</sup> OR 2.25 (1.49 – 3.41)<br>p < 0.001 |
| ICU-admission (N (%)),<br>'do not intubate' excluded                             | 439 / 1923 (22.8 %)<br><sup>A</sup> OR 1.27 (1.11 – 1.46)<br>p < 0.001  | 710 / 3778 (18.8 %)                              | 32 / 80 (40.0%)<br><sup>A</sup> OR 2.89 (1.83 – 4.58)<br>p < 0.001   |
| Duration of ICU-admission (days (IQR))<br>'do not intubate' excluded             | N = 299<br>8 (3 - 19)<br>p = 0.356                                      | N = 437<br>10 (4 – 19)                           | N = 25<br>11 (3.5 – 19)<br>p = 0.356                                 |
| Invasive ventilation (N (%)),<br>'do not intubate' excluded                      | 352 / 1889 (18.6 %)<br><sup>A</sup> OR 1.12 (0.97 – 1.30)<br>p = 0.121  | 623 / 3706 (16.8 %)                              | 29 / 77 (37.7 %)<br><sup>A</sup> OR 2.95 (1.83 – 4.74)<br>p < 0.001  |
| Discharge alive within 42 days; N indicating<br>the number of non-censored cases | N = 1527<br><sup>A</sup> HR 0.96 (0.90 – 1.02)<br>p = 0.15              | N = 2747                                         | N = 52<br><sup>A</sup> HR 0.78 (0.59 – 1.03)<br>p = 0.08             |
| Use of tocilizumab, sarilumab, or anakinra<br>(N (%))                            | 134 / 688 (19.5%)<br><sup>A</sup> OR 1.256 (0.984 – 1.604)<br>p = 0.068 | 199 / 1245 (16.0%)                               | 3 / 34 (8.8%)<br><sup>A</sup> OR 0.550 (0.165 – 1.830)<br>p = 0.330  |
| <b>Complications</b>                                                             | Na 134 mmol/L<br>N = 1821                                               | Na 136 – 145 mmol/L<br>N = 3206                  | Na 146 mmol/L<br>N = 82                                              |
| Bacterial pneumonia (N (%))                                                      | 289 / 2212 (13.1 %)<br><sup>A</sup> OR 1.12 (0.96 – 1.31)<br>p = 0.14   | 501 / 4307 (11.6 %)                              | 18 / 109 (16.5 %)<br><sup>A</sup> OR 1.44 (0.85 – 2.40)<br>p = 0.17  |

|                                      |                                                             |                     |                                                           |
|--------------------------------------|-------------------------------------------------------------|---------------------|-----------------------------------------------------------|
| Aspergillosis pneumonia (N (%))      | 67 / 1915 (3.5 %)<br>^AOR 1.44 (1.03 – 1.99)<br>p = 0.031   | 83 / 3442 (2.4 %)   | 5 / 90 (5.6 %)<br>^AOR 2.26 (0.89 – 5.74)<br>p = 0.084    |
| ARDS (N (%))                         | 224 / 2223 (10.1 %)<br>^AOR 1.08 (0.91 – 1.29)<br>p = 0.377 | 404 / 4323 (9.3 %)  | 17 / 110 (15.5 %)<br>^AOR 1.78 (1.05– 3.04)<br>p = 0.033  |
| Treatment for septic shock (N (%)) * | 94 / 2153 (4.4 %)<br>^AOR 1.33 (1.01 – 1.74)<br>p = 0.04    | 135 / 4175 (3.2 %)  | 12 / 109 (11.0 %)<br>^AOR 3.37 (1.80 – 6.33)<br>p < 0.001 |
| Congestive heart failure (N (%))     | 64 / 2235 (2.9 %)<br>^AOR 0.95 (0.70 – 1.29)<br>p = 0.73    | 125 / 4352 (2.9 %)  | 2 / 111 (1.8 %)<br>^AOR 0.48 (0.12 – 1.96)<br>p = 0.31    |
| Physical decline (N (%))             | 576 / 2116 (27.2 %)<br>^AOR 1.22 (1.08 – 1.38)<br>p < 0.001 | 950 / 4126 (23.0 %) | 30 / 106 (28.3 %)<br>^AOR 1.18 (0.77 – 1.82)<br>p = 0.44  |
| Delirium (N (%))                     | 237 / 2136 (11.1 %)<br>^AOR 0.99 (0.83 - 1.17)<br>p = 0.88  | 451 / 4146 (10.5 %) | 27 / 107 (25.7 %)<br>^AOR 2.25 (1.42 – 3.56)<br>p < 0.001 |

ICU = Intensive care unit; ARDS = acute respiratory distress syndrome. ^AOR = adjusted odds ratio; odds ratio adjusted for sex assigned at birth, age, a history of chronic kidney disease, and a history of hypertension. ^AHR = adjusted hazard ratio; hazard ratio adjusted for sex assigned at birth, age, a history of chronic kidney disease, and a history of hypertension \* Treatment for septic shock was defined as the need for vasopressors in order to maintain mean arterial blood pressure >65 mmHg and blood lactate level >2 mmol/L, in the absence of other causes including hypovolemia. Significance was assessed using a cox proportional-hazard model at the mean of the covariates (discharge alive) or logistic regression (all other values). p – values for all groups indicate significance when compared to the normonatremia group.

1  
2  
3 **Corresponding author:**  
4

5 Lianne R. de Haan

6  
7 [Lr.de.haan@nwz.nl](mailto:Lr.de.haan@nwz.nl)

8  
9 Hospitaalweg 1

10  
11 1315 RA Almere

12  
13 The Netherlands  
14  
15

16 **Alternative proofreader:**  
17

18 Renée A. Douma

19  
20 [rdouma@flevoziekenhuis.nl](mailto:rdouma@flevoziekenhuis.nl)  
21  
22  
23  
24  
25  
26  
27  
28  
29  
30  
31  
32  
33  
34  
35  
36  
37  
38  
39  
40  
41  
42  
43  
44  
45  
46  
47  
48  
49  
50  
51  
52  
53  
54  
55  
56  
57  
58  
59  
60



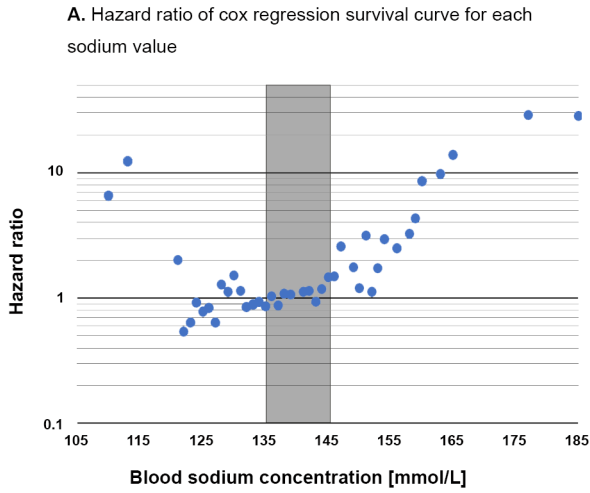

| Covariate                         | Hazard ratio (95% CI) | p - value |
|-----------------------------------|-----------------------|-----------|
| Male sex assigned at birth        | 1.241 (1.094 - 1.407) | < 0.001   |
| Age (years)                       | 1.062 (1.056 - 1.068) | < 0.001   |
| History of hypertension           | 1.116 (0.988 - 1.260) | 0.077     |
| History of chronic kidney disease | 1.372 (1.182 - 1.592) | < 0.001   |
| Sodium (mmol/L)                   | 1.020 (1.008 - 1.032) | 0.001     |

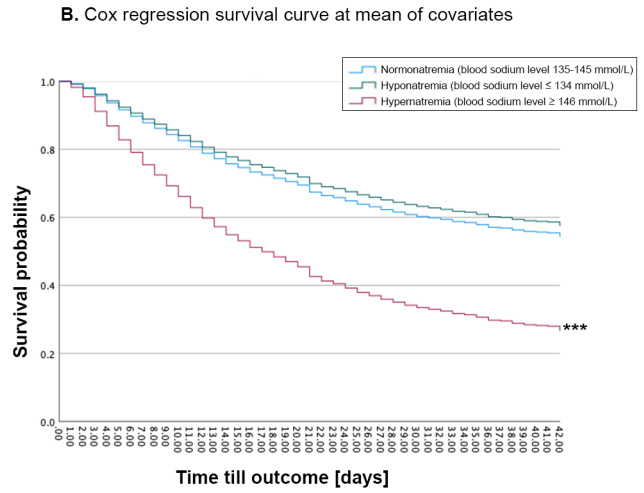

**C. Cox regression survival curve at mean of covariates adjusted for age, sex assigned at birth, chronic kidney disease, and hypertension**

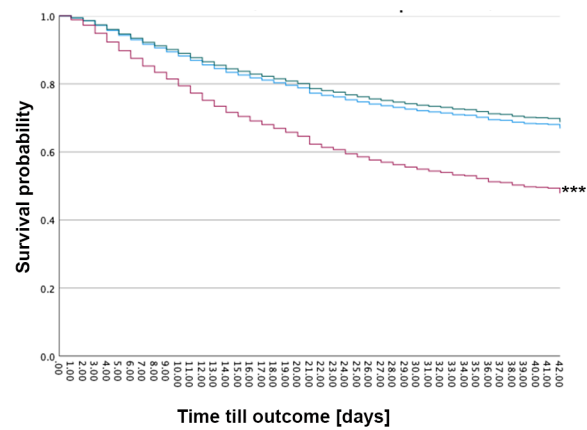

**D. Cox regression survival curve at mean of covariates separated by etiology**

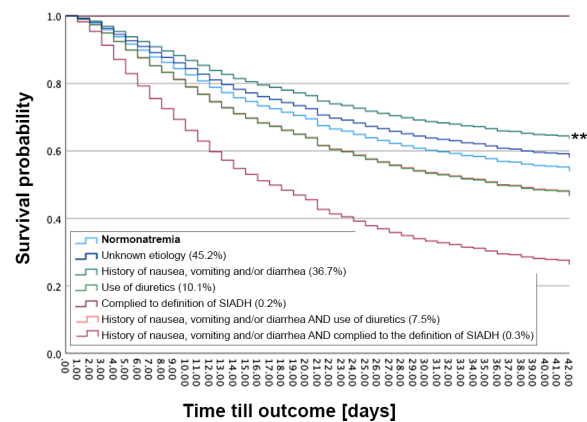

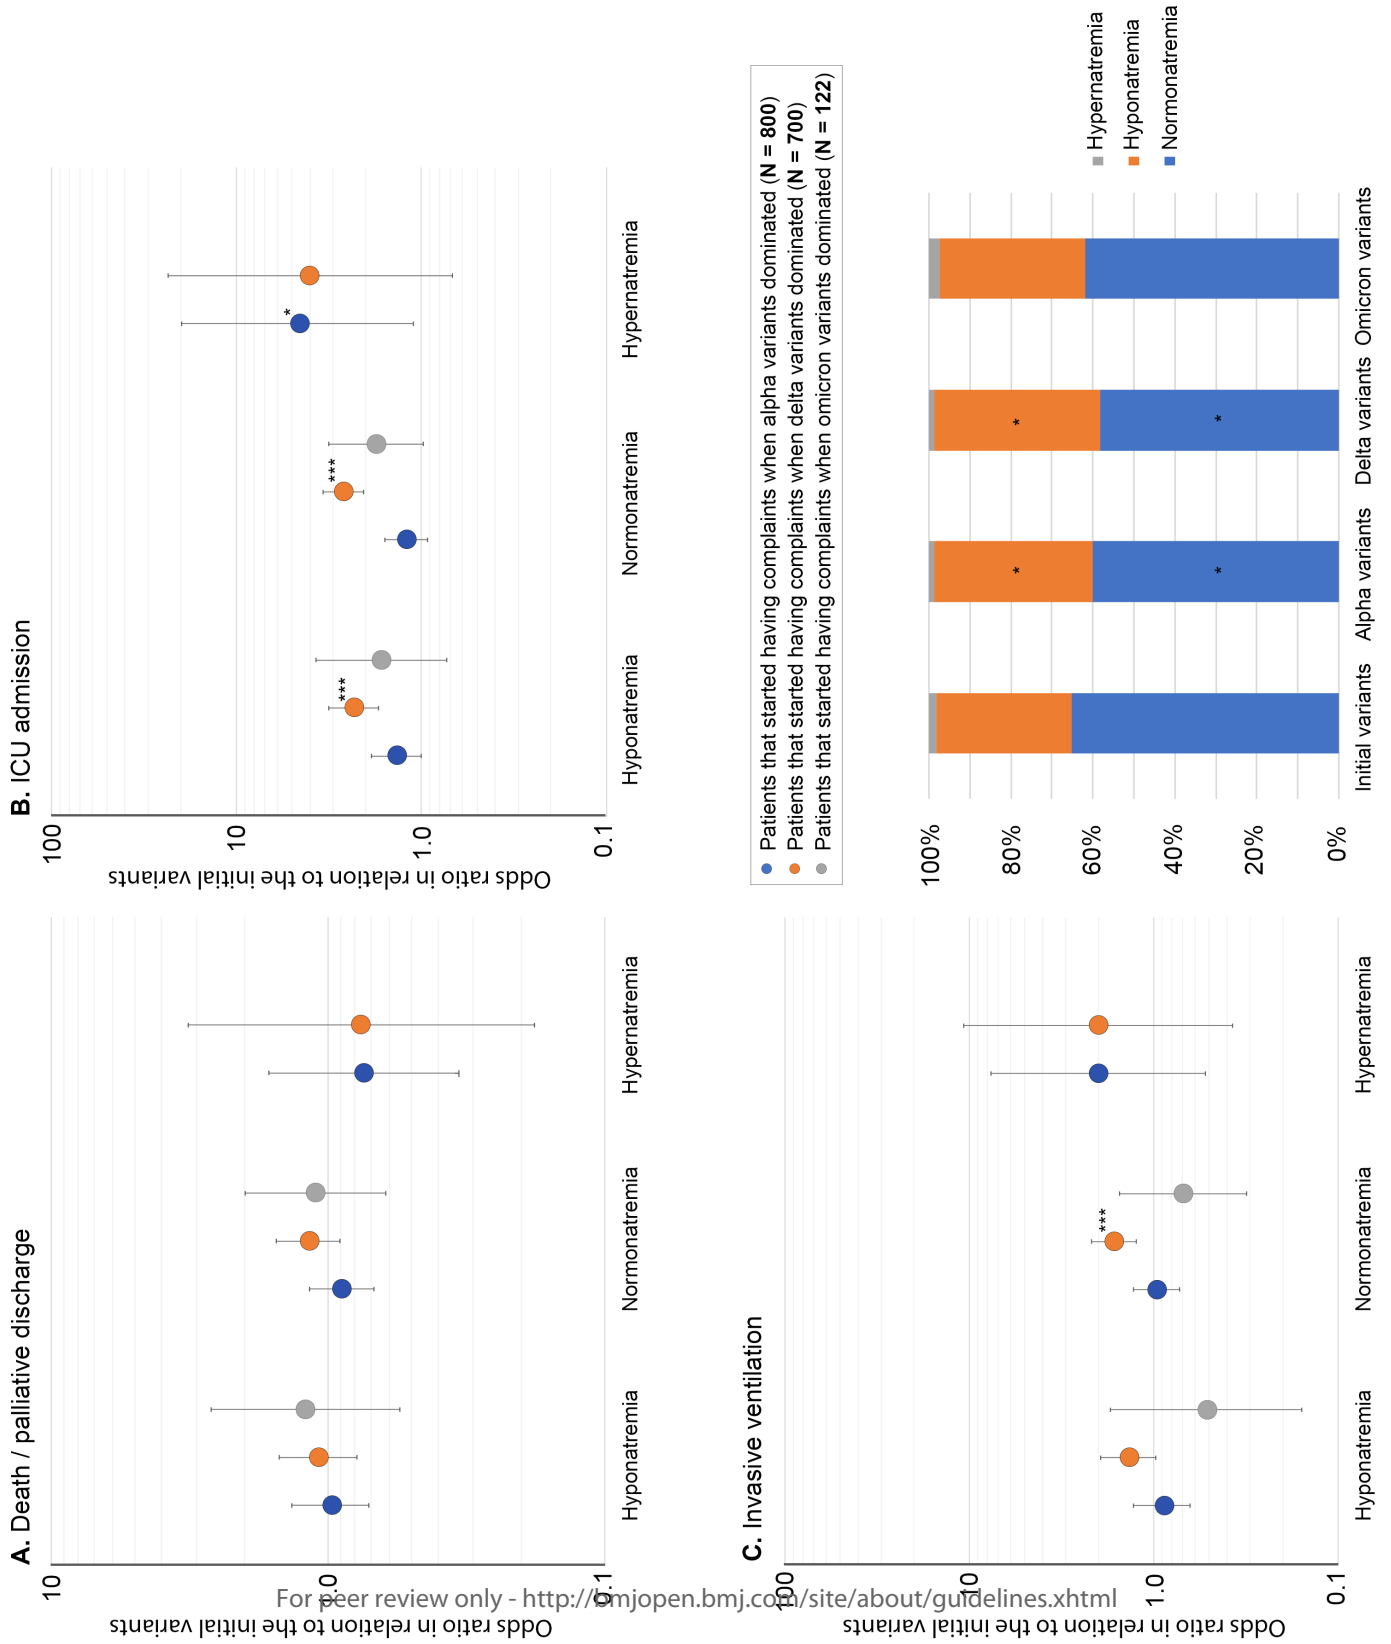

1 **What is the etiology of dysnatremia in COVID-19 and how is this**  
2  
3 **related to outcomes in patients admitted during earlier and later**  
4  
5 **COVID-19 waves? A multicentre, retrospective observational study**  
6  
7 **in eleven Dutch hospitals**  
8  
9

10  
11  
12 **Supplemental information**  
13  
14  
15  
16  
17  
18  
19

20 L.R. de Haan<sup>a, f1, \*</sup>, M. ten Wolde<sup>a</sup>, M. Beudel<sup>b</sup>, R.H. Olde Engberink<sup>c</sup>, B. Appelman<sup>c</sup>, E.K. Haspels-Hogervorst<sup>d</sup>, D.  
21 Rusch<sup>d</sup>, N.C. Gritters-van den Oever<sup>e</sup>, S. Simsek<sup>f1</sup>, N. Paternotte<sup>f2</sup>, J.P. van den Bergh<sup>g</sup>, C.E. Wyers<sup>g</sup>, M. de Kruijff<sup>h1</sup>, T.  
22 Dormans<sup>h2</sup>, H. Moeniralam<sup>i</sup>, N. Bokhizzoui<sup>j</sup>, K. Brinkman<sup>k</sup>, R.A. Douma<sup>a</sup>, on behalf on The Dutch COVID-PREDICT  
23  
24 study group  
25  
26  
27  
28  
29  
30  
31

32 <sup>a</sup> *Department of Internal Medicine, Flevo Hospital, Almere, the Netherlands*

33 <sup>b</sup> *Department of Neurology, Amsterdam University Medical Centre*

34 <sup>c</sup> *Center of Experimental and Molecular Medicine (C.E.M.M.), Location Academic Medical Center, Amsterdam UMC,*  
35 *Amsterdam, The Netherlands.*

36 <sup>d</sup> *Intensive care department, Martini Hospital, Groningen, the Netherlands*

37 <sup>e</sup> *Intensive care department, Treant Hospitals, Hoogeveen, Emmen, and Stadskanaal, the Netherlands*

38 <sup>f1</sup> *Department of Internal Medicine, Northwest Clinics, Alkmaar, the Netherlands*

39 <sup>f2</sup> *Department of Pulmonary diseases, Northwest Clinics, Alkmaar, the Netherlands*

40 <sup>g</sup> *Department of Internal Medicine, VieCuri Medical Centre, Venlo, the Netherlands*

41 <sup>h1</sup> *Department of Pulmonary diseases, Zuyderland Medical Centre, Heerlen, the Netherlands*

42 <sup>h2</sup> *Department of Intensive Care, Zuyderland Medical Centre, Heerlen, the Netherlands*

43 <sup>i</sup> *Department of Internal Medicine, St. Antonius Hospital, Nieuwegein, the Netherlands*

44 <sup>j</sup> *Department of Internal Medicine, BovenIJ hospital, Amsterdam, the Netherlands*

45 <sup>k</sup> *Department of Internal Medicine, Onze Lieve Vrouwe Gasthuis, Amsterdam, the Netherlands*  
46  
47  
48  
49  
50  
51  
52  
53  
54  
55  
56  
57  
58  
59  
60

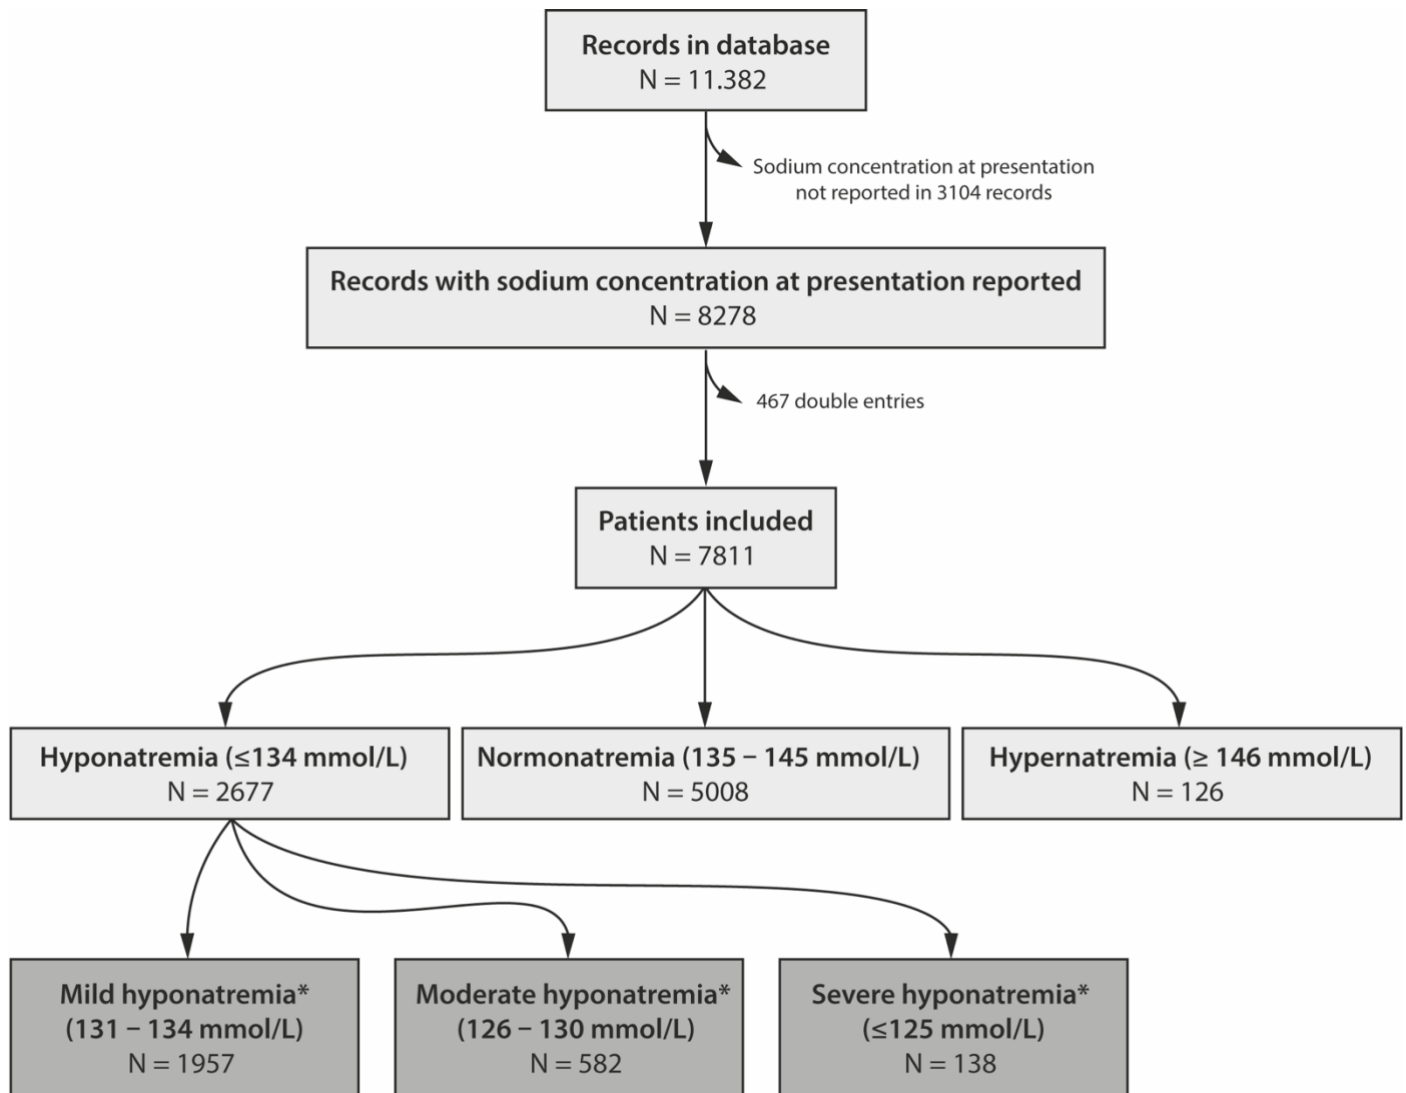

43 **Supplemental Figure 1.** Flow chart of included patients. Sodium concentrations indicate corrected serum sodium concentrations at hospital presentation \* indicates  
44 the subgroup analysis as provided in the supplemental information.

**Supplemental Table 1** – Subgroup analysis of patient characteristics

|                                                     | Na 135 – 145 mmol/L<br>N = 5008    | Na ≤134 mmol/L<br>N = 2677          | Na 131 – 134 mmol/L<br>N = 1957     | Na 126 – 130 mmol/L<br>N = 582    | Na ≤125 mmol/L<br>N = 138        |
|-----------------------------------------------------|------------------------------------|-------------------------------------|-------------------------------------|-----------------------------------|----------------------------------|
| Sex assigned at birth (N (%))                       | ♂ 2946 (58.8 %)<br>♀ 2060 (41.2 %) | ♂ 1673 (62.5%) **<br>♀ 1003 (37.5%) | ♂ 1249 (63.9%) ***<br>♀ 707 (36.1%) | ♂ 363 (62.4%)<br>♀ 219 (37.6%)    | ♂ 61 (44.2%) ***<br>♀ 77 (55.8%) |
| Age (median age in years (IQR))                     | N = 5008<br>66.1 (55.0-76.0)       | N = 2675<br>67.0 (58.0-77.0) **     | N = 1956<br>67.0 (57.0 – 76.0)      | N = 581<br>68.1 (60.0 – 78.0) *** | N =138<br>70.6 (62.0 – 79.3) *** |
| BMI (median BMI in kg/m <sup>2</sup> (IQR))         | N = 3374<br>27.7 (24.6 – 31.6)     | N = 1740<br>27.2 (24.2 – 31.1) **   | N = 1271<br>27.4 (24.4 – 31.5)      | N = 379<br>26.3 (23.4 – 30.3) *** | N = 90<br>26.9 (23.7 – 30.9)     |
| Order ‘Do not intubate’ (N (%))                     | 796 / 2469 (32.2 %)                | 440 / 1442 (30.5 %)                 | 304 / 1043 (29.1 %)                 | 108 / 322 (33.5 %)                | 28 / 77 (36.4 %)                 |
| Sodium (mean corrected serum level in mmol/L (IQR)) | 138.02 (136.42 – 140.0)            | 132.59 (130.72 – 134.00) ***        | 133.3 (132.28 – 134.19) ***         | 129.42 (128.04 – 130.22) ***      | 123.94 (121.17 – 125.0) ***      |
| Chronic cardiac disease (N (%))                     | 1334 / 4982 (26.8 %)               | 760 / 2666 (28.5%)                  | 541 / 1948 (27.8 %)                 | 187 / 581 (32.2 %)                | 32 / 137 (23.4 %)                |
| Hypertension (N (%))                                | 1889 / 4586 (41.2 %)               | 1055 / 2374 (44.4 %) **             | 749 / 1735 (43.2 %)                 | 240 / 520 (46.2 %)                | 66 / 119 (55.5 %) **             |
| Chronic pulmonary disease (N (%))                   | 844 / 4979 (17.0 %)                | 466 / 2662 (17.5 %)                 | 328 / 1945 (16.9 %)                 | 111 / 580 (19.1 %)                | 27 / 137 (19.7 %)                |
| Chronic kidney disease (N (%))                      | 491 / 4587 (10.7 %)                | 329 / 2379 (13.8 %) ***             | 220 / 1738 (12.7 %)                 | 92 / 522 (17.6 %) ***             | 17 / 119 (14.3 %)                |
| Moderate to severe liver disease (N (%))            | 50 / 4972 (1.0 %)                  | 30 / 2662 (1.1%)                    | 25 / 1947 (1.3%)                    | 3 / 579 (0.5 %)                   | 2 / 136 (1.5%)                   |
| Diabetes (N (%))                                    | 1261 / 4972 (25.4 %)               | 664 / 2662 (24.9 %)                 | 481 / 1946 (24.7 %)                 | 148 / 579 (25.6 %)                | 35 / 137 (25.5 %)                |
| Immunosuppressives (N (%))                          | 295 / 4445 (6.6 %)                 | 192 / 2283 (8.4 %) **               | 129 / 1669 (7.7 %)                  | 56 / 497 (11.3 %) **              | 7 / 117 (6.0 %)                  |
| Thiazide diuretics (N (%))                          | 394 / 4994 (7.9 %)                 | 258 / 2671 (9.7 %) **               | 186 / 1953 (9.5 %)                  | 55 / 580 (9.5 %)                  | 17 / 138 (12.3 %)                |
| Loop diuretics (N (%))                              | 389 / 4994 (7.8 %)                 | 187 / 2671 (7.0 %)                  | 128 / 1953 (6.6 %)                  | 50 / 580 (8.6 %)                  | 9 / 138 (6.5 %)                  |
| SSRIs (N (%))                                       | 164 / 4994 (3.3 %)                 | 78 / 2671 (2.9 %)                   | 53 / 1953 (2.7%)                    | 15 / 580 (2.6%)                   | 10 / 138 (7.2 %)                 |

BMI = body mass index; IQR = interquartile range; % = percentage of patients in this group with indicated characteristic; SSRI = Selective Serotonin Reuptake inhibitor. SNRI = Selective Serotonin and Noradrenalin Reuptake inhibitor. Significance was assessed using a Kruskal-Wallis test with post-hoc correction (for numerical data; non-normally distributed) or Chi-square test (for categorical data). p – values for all groups indicate the adjusted significance after post-hoc correction when compared to the normonatremia group. \* Indicates a p-value <0.05, \*\* indicates a p-value <0.01, \*\*\* indicates a p-value <0.001

1  
2  
3  
4  
5  
6  
7  
8  
9  
10  
11  
12  
13  
14  
15  
16  
17  
18  
19  
20  
21  
22  
23  
24  
25  
26  
27  
28  
29  
30  
31  
32  
33  
34  
35  
36  
37  
38  
39  
40  
41  
42  
43  
44  
45  
46

For peer review only

**Supplemental Table 2** – Definitions for comorbidities

| Comorbidity                      | Included diseases                                                                                                                                                                                                                                                                                                                                                                                                                                                                                                                                                                                                                                                                                                                                                                                                                                                                                            |
|----------------------------------|--------------------------------------------------------------------------------------------------------------------------------------------------------------------------------------------------------------------------------------------------------------------------------------------------------------------------------------------------------------------------------------------------------------------------------------------------------------------------------------------------------------------------------------------------------------------------------------------------------------------------------------------------------------------------------------------------------------------------------------------------------------------------------------------------------------------------------------------------------------------------------------------------------------|
| Chronic pulmonary disease        | Alpha-1 trypsin deficiency; asbestosis; cryptogenic organizing pneumonia; lymphangioleiomyomatosis; lung disease immuno-deficiency and chromosome breakage syndrome; bronchopulmonary dysplasia; primary ciliary dyskinesia; bronchiectasis; cystic fibrosis; chronic bronchitis or emphysema; lung fibrosis; sarcoidosis; obstructive sleep apnea; pulmonary hypertension                                                                                                                                                                                                                                                                                                                                                                                                                                                                                                                                   |
| Chronic cardiac disease          | <b>Chronical heart disease:</b> Myocardial infarction; Cardiac arrhythmias (AVNRT, atrial fibrillation, (supra)ventricular tachycardia, ventricular tachycardia, brugada syndrome, sick sinus syndrome, wolf parkinson white syndrome; decompensated heart failure, cardiomyopathy; valve disease (aortic valve stenosis, aortic valve insufficiency<br><b>Congenital heart disease:</b> aortic valve insufficiency or aortic valve stenosis; Atrial septal defect or ventricular septal defect; hypoplastic left heart syndrome; Ebstein’s anomaly; patent ductus arteriosus; tetralogy of Fallot; transposition of the great vessels                                                                                                                                                                                                                                                                       |
| Chronic kidney disease           | Acute tubulointerstitial nephritis; hemolytic uremic syndrome (HUS); amyloidosis; Anti-glomerular basement membrane disease; bartter syndrome; kidney damage due to medication, chronic bladder infections / kidney infections / diabetes, high blood pressure, arteriosclerosis; cryoglobulinemia, renal cystic disease; cystinosis; dense deposit disease (DDD); Focal segmental glomerulosclerosis (FSGS); Gitelman syndrome; glomerulonephritis; HNF1beta associated kidney disease; renal fusion (horseshoe kidney); IgA nephropathy; medullary sponge kidney; membranous nephropathy; minimal change disease; solitary kidney; Nail-patella syndrome (NPS); nephrogenic diabetes insipidus; nephroptosis; nephrotic syndrome; renal angiolioma; renal cell carcinoma; primary hyperoxaluria; reflux nephropathy; atrophic kidney; scleroderma; lupus nephritis; Alport’s syndrome; systemic vasculitis |
| Moderate to severe liver disease | Liver disease that caused cirrhosis (e.g. Budd Chiari, hemochromatosis, hepatitis, Wilson’s disease)                                                                                                                                                                                                                                                                                                                                                                                                                                                                                                                                                                                                                                                                                                                                                                                                         |

**Supplemental Table 3** – Subgroup analysis of signs and symptoms

| Signs and symptoms                                                                                         | Na 135 – 145 mmol/L<br>N = 3206 | Na ≤134 mmol/L<br>N = 1821        | Na 131 – 134 mmol/L<br>N = 1346   | Na 126 – 130 mmol/L<br>N = 383  | Na ≤125 mmol/L<br>N = 92     |
|------------------------------------------------------------------------------------------------------------|---------------------------------|-----------------------------------|-----------------------------------|---------------------------------|------------------------------|
| Nausea / vomiting (N (%))                                                                                  | 1150 / 4129 (27.9 %)            | 679 / 2273 (29.9 %)               | 490 / 1663 (29.5 %)               | 151 / 499 (30.3 %)              | 38 / 111 (34.2%)             |
| Diarrhea (N (%))                                                                                           | 1146 / 4157 (27.6 %)            | 804 / 2298 (35.0%) ***            | 574 / 1686 (34.0 %) ***           | 180 / 501 (35.9%) ***           | 50 / 111 (45.0 %) ***        |
| Anosmia (N (%))                                                                                            | 352 / 3330 (10.6 %)             | 244 / 1904 (12.8 %) **            | 174 / 1395 (12.5 %)               | 62 / 420 (14.8 %)               | 8 / 89 (9.0 %)               |
| Confusion (N (%))                                                                                          | 651 / 4381 (14.9 %)             | 311 / 2319 (13.4%)                | 207 / 1688 (12.3 %)               | 78 / 511 (15.3 %)               | 26 / 120 (21.7 %)            |
| Seizures (N (%))                                                                                           | 31 / 3452 (0.9 %)               | 10 / 1977 (0.5%)                  | 6 / 1448 (0.4 %)                  | 2 / 434 (0.5 %)                 | 2 / 95 (2.1 %)               |
| FiO2 (median fraction (IQR))                                                                               | N = 2084<br>0.36 (0.28 – 0.50)  | N = 1159<br>0.36 (0.28 – 0.50)    | N = 848<br>0.36 (0.28 – 0.48)     | N = 258<br>0.36 (0.32 – 0.60)   | N = 53<br>0.36 (0.31 – 0.75) |
| SBP (mean SBP in mmHg (SD))                                                                                | N = 2648<br>132 (± 22)          | N = 4971<br>135 (±23) ***         | N = 1934<br>132 (±22) ***         | N = 578<br>132 (±22) **         | N = 136<br>138 (±27)         |
| HR (mean HR in BPM (SD))                                                                                   | N = 4965<br>91 (±20)            | N = 2661<br>92 (±18) **           | N = 1946<br>92 (±18) *            | N = 580<br>92 (±18)             | N = 135<br>90 (±19)          |
| Disturbed capillary refill (N (%))                                                                         | 93 / 1369 (6.8 %)               | 81 / 863 (9.4 %)                  | 51 / 614 (8.3 %)                  | 27 / 206 (13.1 %)               | 3 / 43 (7.0 %)               |
| Blood urea level (median level n mmol/L (IQR))                                                             | N = 4776<br>6.2 (4.5 – 9.2)     | N = 2549<br>6.3 (4.5 – 9.3)       | N = 1892<br>6.3 (4.6 – 9.1)       | N = 559<br>6.2 (4.5 – 10.2)     | N = 128<br>5.5 (4.2 – 9.8)   |
| eGFR rate using 2021 CKD-epi creatinine equation in (median clearance in ml/min/1.73 m <sup>3</sup> (IQR)) | N = 4983<br>68 (46 – 94)        | N = 2656<br>64 (45 – 90) ***      | N = 1944<br>64 (46 – 89) ***      | N = 575<br>63 (41 – 90) ***     | N = 137<br>79 (46 – 92)      |
| CT-severity score (mean score (SD))                                                                        | N = 1401<br>12.1 (±5.6)         | N = 909<br>12.4 (±5.5)            | N = 684<br>12.3 (±5.4)            | N = 190<br>12.6 (±5.4)          | N = 35<br>12.5 (±6.7)        |
| Blood CRP level (median level in mg/L (IQR))                                                               | N = 4939<br>70.8 (28.0 – 131)   | N = 2646<br>93.1 (49.0 – 154) *** | N = 1933<br>93.0 (48.2 – 151) *** | N = 577<br>103 (54.6 – 166) *** | N = 136<br>82.5 (36.0 – 145) |
| Blood LDH level (median level in U/L (IQR))                                                                | N = 4226<br>323 (247 – 426)     | N = 2238<br>349 (268 – 471) ***   | N = 1651<br>346 (269 – 467) ***   | N = 479<br>361 (269 – 482) ***  | N = 108<br>331 (240 – 543)   |
| Modified early warning score (MEWS) (median score (IQR))                                                   | N = 4055<br>3.0 (2.0 – 4.0)     | N = 2337<br>3.0 (2.0 – 4.0) ***   | N = 1709<br>3.0 (2.0 – 4.0) ***   | N = 509<br>3.0 (2.0 – 4.0)      | N = 119<br>3.0 (2.0 – 4.0)   |
| Quick sequential organ failure assessment (median score (IQR))                                             | N = 4131<br>1.0 (0.0 – 1.0)     | N = 2373<br>1.0 (0.0 – 1.0)       | N = 1735<br>1.0 (0.0 – 1.0)       | N = 517<br>1.0 (0.0 – 1.0)      | N = 121<br>1.0 (0.0 – 1.0)   |

SBP = systolic blood pressure; HR = heart rate; CKD-epi = chronic kidney disease Epidemiology Collaboration BPM = beats per minute; IQR = interquartile range; SD = standard deviation; CRP = c-reactive protein; LDH = lactate dehydrogenase; % = percentage of patients in this group with indicated characteristic. Significance was assessed using a Kruskal wallis test with post-hoc correction (for numerical data) or Chi-square test (for categorical data). \* Indicates a p-value <0.05, \*\* indicates a p-value <0.01, \*\*\* indicates a p-value <0.001



A. Cox regression survival curve at mean of covariates

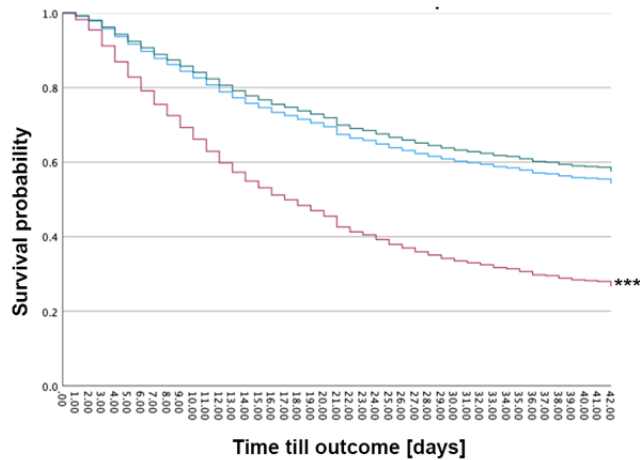

B. Cox regression survival curve at mean of covariates

corrected for age, sex assigned at birth, chronic kidney disease, and hypertension

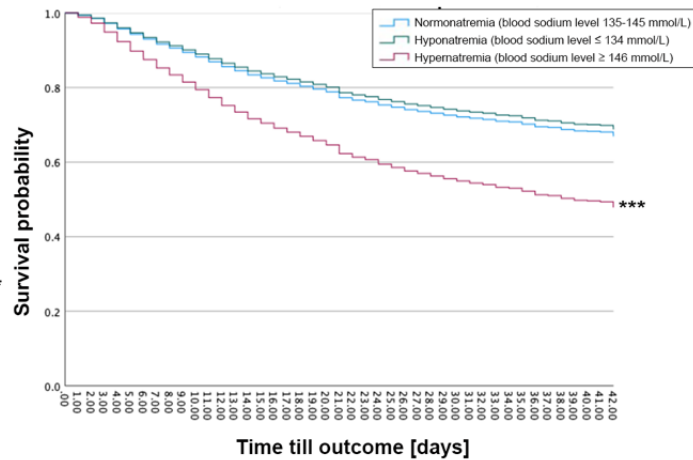

C. Cox regression survival curve at mean of covariates

categorized by severity groups

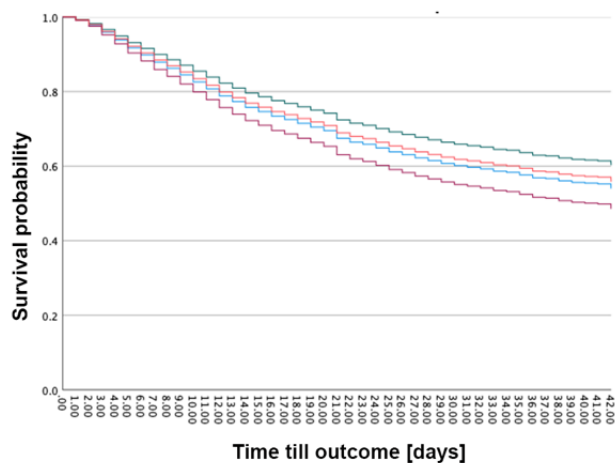

D. Cox regression survival curve at mean of covariates

corrected for age, sex assigned at birth, chronic kidney disease, and hypertension, categorized by severity groups

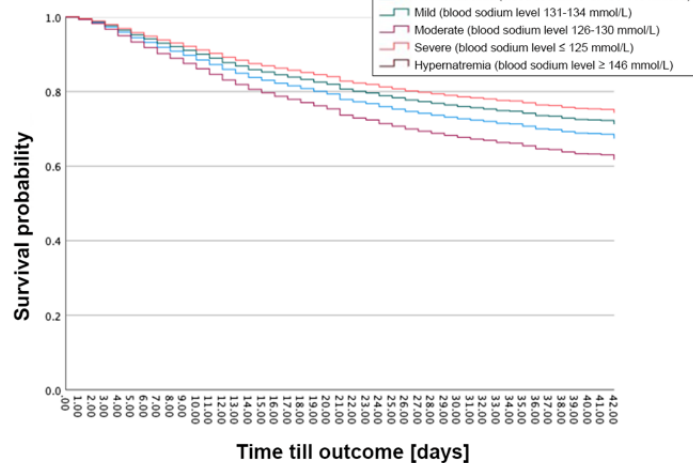

**Supplemental Figure 2.** Cox proportional survival curves at the mean of covariates for (A) unadjusted 6-week mortality categorized by normo-, hypo-, and hypernatremia, (B) 6-week mortality adjusted for age, sex assigned at birth, a history of chronic kidney disease, and a history of hypertension stratified in normo-, hypo-, and hypernatremia, (C) unadjusted 6-week mortality stratified in normo- and hypernatremia and mild, moderate, and severe hyponatremia, and (D) 6-week mortality adjusted for age, sex assigned at birth, a history of chronic kidney disease, and a history of hypertension stratified in normo- and hypernatremia and mild, moderate, and severe hyponatremia. \* Indicates a p-value  $<0.05$ , \*\*\* indicates a p-value  $<0.001$

**Supplemental Table 4** – Subgroup analysis of outcome and complications

| Outcome                                                                       | Na 135 – 145 mmol/L<br>N = 3206 | Na ≤134 mmol/L<br>N = 1821                                              | Na 131 – 134 mmol/L<br>N = 1346                                | Na 126 – 130 mmol/L<br>N = 383                                 | Na ≤125 mmol/L<br>N = 92                                   |
|-------------------------------------------------------------------------------|---------------------------------|-------------------------------------------------------------------------|----------------------------------------------------------------|----------------------------------------------------------------|------------------------------------------------------------|
| Duration of admission (median days (IQR))                                     | N = 4116<br>7 (3 – 14)          | N = 2372<br>7 (4 – 16) ***                                              | N = 1735<br>7 (4 – 15) **                                      | N = 514<br>8 (4 – 18)*                                         | N123<br>8 (3 – 18)                                         |
| Death or palliative discharge (N (%))                                         | 729 / 4568 (16.0 %)             | 405 / 2360 (17.2 %)<br><sup>A</sup> OR 1.042 (0.906 – 1.200)            | 269 / 1723 (15.6 %)                                            | 115 / 518 (22.2 %)                                             | 21 / 119 (17.6 %)                                          |
| ICU-admission (N (%), 'do not intubate' excluded)                             | 710 / 3778 (18.8 %)             | 439 / 1923 (22.8 %)<br><sup>A</sup> OR 1.274 (1.112 – 1.458)***         | 314 / 1422 (22.1 %)<br><sup>A</sup> OR 1.205 (1.036 – 1.401)*  | 104 / 410 (25.4 %)<br><sup>A</sup> OR 1.487 (1.170 – 1.889)*** | 21 / 91 (23.1 %)<br><sup>A</sup> OR 1.431 (0.868 – 2.360)  |
| Duration of ICU-admission (days (IQR))<br>'do not intubate' excluded          | N = 437<br>10 (4 – 19)          | N = 299<br>8 (3 - 19)<br>p = 0.356                                      | N = 215<br>8 (3 – 20)                                          | N = 68<br>8 (4 – 18)                                           | N = 16<br>9 (4 – 21)                                       |
| Invasive ventilation (N (%)),<br>'do not intubate' excluded                   | 623 / 3706 (16.8 %)             | 352 / 1889 (18.6 %)<br><sup>A</sup> OR 1.122 (0.970 – 1.298)            | 250 / 1396 (17.9 %)                                            | 85 / 402 (21.1 %)                                              | 17 / 91 (18.7 %)                                           |
| Discharge alive within 42 days; N indicating the number of non-censored cases | N = 2747                        | N = 1527<br><sup>A</sup> HR 0.955 (0.897 – 1.017)<br>p = 0.154          | N = 1153                                                       | N = 302                                                        | N = 72                                                     |
| Use of tocilizumab, sarilumab, or anakinra (N (%))                            | 199 / 1245 (16.0%)              | 134 / 688 (19.5%)<br><sup>A</sup> OR 1.256 (0.984 – 1.604)<br>p = 0.068 | 91 / 480 (19.0 %)                                              | 36 / 169 (21.3 %)                                              | 7 / 39 (17.9%)                                             |
| Complications                                                                 | Na 135 – 145 mmol/L<br>N = 3206 | Na ≤134 mmol/L<br>N = 1821                                              | Na 131 – 134 mmol/L<br>N = 1346                                | Na 126 – 130 mmol/L<br>N = 383                                 | Na ≤125 mmol/L<br>N = 92                                   |
| Bacterial pneumonia (N (%))                                                   | 501 / 4307 (11.6 %)             | 289 / 2212 (13.1 %)<br><sup>A</sup> OR 1.123 (0.962 – 1.312)            | 207 / 1619 (12.8 %)                                            | 72 / 483 (14.9 %)                                              | 10 / 110 (9.1 %)                                           |
| Aspergillosis pneumonia (N (%))                                               | 83 / 3456 (2.4 %)               | 67 / 1915 (3.5 %)<br><sup>A</sup> OR 1.436 (1.034 – 1.993)              | 49 / 1402 (3.5 %)<br><sup>A</sup> OR 1.426 (0.995 – 2.044)     | 14 / 417 (3.4 %)<br><sup>A</sup> OR 1.352 (0.759 – 2.410)      | 4 / 96 (4.2 %)<br><sup>A</sup> OR 1.839 (0.657 – 5.148)    |
| ARDS (N (%))                                                                  | 404 / 4323 (9.3 %)              | 224 / 2223 (10.1 %)<br><sup>A</sup> OR 1.081 (0.909 – 1.286)            | 161 / 1627 (9.9 %)                                             | 52 / 486 (10.7 %)                                              | 11 / 110 (10.0 %)                                          |
| Treatment for septic shock (N (%)) &                                          | 135 / 4175 (3.2 %)              | 94 / 2153 (4.4 %)<br><sup>A</sup> OR 1.326 (1.013 – 1.737)*             | 66 / 1570 (4.2 %)<br><sup>A</sup> OR 1.274 (0.943 – 1.721)     | 25 / 478 (5.2 %)<br><sup>A</sup> OR 1.570 (1.012 – 2.438)*     | 3 / 105 (2.9%)<br><sup>A</sup> OR 0.920 (0.287 – 2.946)    |
| Congestive heart failure (N (%))                                              | 125 / 4352 (2.9 %)              | 64 / 2235 (2.9 %)<br><sup>A</sup> OR 0.946 (0.696 – 1.287)              | 34 / 1637 (2.1%)                                               | 23 / 488 (4.7 %)                                               | 7 / 110 (6.4 %)                                            |
| Physical decline (N (%))                                                      | 950 / 4126 (23.0 %)             | 576 / 2116 (27.2 %)<br><sup>A</sup> OR 1.221 (1.082 – 1.377)**          | 414 / 1544 (26.8 %)<br><sup>A</sup> OR 1.206 (1.054 – 1.380)** | 136 / 468 (29.1 %)<br><sup>A</sup> OR 1.303 (1.053 – 1.614)*   | 26 / 104 (25.0 %)<br><sup>A</sup> OR 1.059 (0.674 – 1.666) |

|   |                  |                     |                                                  |                     |                   |                   |
|---|------------------|---------------------|--------------------------------------------------|---------------------|-------------------|-------------------|
| 1 | Delirium (N (%)) | 451 / 4146 (10.5 %) | 237 / 2136 (11.1 %)<br>^OR 0.987 (0.833 - 1.170) | 157 / 1557 (10.1 %) | 62 / 474 (13.1 %) | 18 / 105 (17.1 %) |
|---|------------------|---------------------|--------------------------------------------------|---------------------|-------------------|-------------------|

2  
3  
4 *ICU = Intensive care unit; ARDS = acute respiratory distress syndrome; OR = odds ratio; ^OR = adjusted odds ratio; odds ratio corrected for sex assigned at birth and age; IQR = interquartile range.*  
5 *#Uncorrected for sex assigned at birth and age & Treatment for septic shock was defined as the need for vasopressors in order to maintain mean arterial blood pressure >65 mmHg and blood lactate level >2*  
6 *mmol/L, in the absence of other causes including hypovolemia. Significance was assessed using a Kruskal wallis test with post-hoc correction (time to discharge alive) or logistic regression (all other values). \**  
7 *Indicates a p-value <0.05, \*\* indicates a p-value <0.01, \*\*\* indicates a p-value <0.001*

8  
9  
10  
11  
12  
13  
14  
15  
16  
17  
18  
19  
20  
21  
22  
23  
24  
25  
26  
27  
28  
29  
30  
31  
32  
33  
34  
35  
36  
37  
38  
39  
40  
41  
42  
43  
44  
45  
46

For peer review only

**Supplemental Table 5** – Characteristics of patients with the order ‘do not intubate’

|                                                        | Order ‘do not intubate’                        | No order ‘do not intubate’                       | p-value   |
|--------------------------------------------------------|------------------------------------------------|--------------------------------------------------|-----------|
| Sex assigned at birth (N (%))                          | ♀ 531 / 1576 (33.7 %)<br>♂ 743 / 2388 (31.1 %) | ♀ 1045 / 1576 (66.3 %)<br>♂ 1645 / 2388 (68.9 %) | p = 0.095 |
| Age (median age in years (IQR))                        | 79 (73 – 84)                                   | 62 (53 – 71)                                     | p < 0.001 |
| BMI (median BMI in kg/m <sup>2</sup> (IQR))            | 26.2 (23.1 – 30.1)                             | 27.9 (25.0 – 31.9)                               | p < 0.001 |
| Corrected sodium level at presentation in mmol/L (IQR) | 135.9 (± 4.5)                                  | 136.6 (± 5.1)                                    | p < 0.001 |
| ICU admission (N (%))                                  | 83 / 1275 (6.5 %)                              | 781 / 2690 (29 %)                                | p < 0.001 |
| Chronic pulmonary disease (N (%))                      | 361 / 1270 (28.4 %)                            | 359 / 2680 (13.4%)                               | p < 0.001 |
| <i>Asthma (N (%))</i>                                  | 95 / 1269 (7.5 %)                              | 256 / 2678 (9.6%)                                | p = 0.036 |
| <i>Chronic obstructive pulmonary disease (N (%))</i>   | 125 / 267 (46.8 %)                             | 80 / 293 (27.3 %)                                | p < 0.001 |
| Chronic kidney disease (N (%))                         | 259 / 1270 (20.4 %)                            | 250 / 2681 (9.3%)                                | p < 0.001 |
| Chronic cardiac disease (N (%))                        | 637 / 1266 (50.3 %)                            | 564 / 2683 (21.0%)                               | p < 0.001 |
| Hypertension (N (%))                                   | 755 / 1270 (59.4 %)                            | 1051 / 2685 (39.1 %)                             | p < 0.001 |
| Moderate to severe liver disease (N (%))               | 21 / 1267 (1.7 %)                              | 28 / 2680 (1.0 %)                                | p = 0.123 |
| Diabetes (N (%))                                       | 457 / 1270 (36.0 %)                            | 679 / 2680 (25.3 %)                              | p < 0.001 |
| Neoplasm (N (%))                                       | 156 / 1273 (12.3 %)                            | 130 / 2682 (4.8 %)                               | p < 0.001 |

BMI = Body Mass Index; IQR = interquartile range. Significance was assessed using a Student’s t-test (for normally distributed numerical data), Mann-Whitney test (for non-normally distributed numerical data) or Chi-square test (for categorical data). p – values for all groups indicate the 2-tailed significance between the two groups.

**Supplemental Table 6** – Patient characteristics, signs and symptoms, outcome measures, and complications of patients with hyponatremia ( $\text{Na} \leq 134$  mmol/L) that did not use diuretics stratified based on their urinary sodium excretion.

| Patient characteristics                                                                                    | Urinary sodium excretion < 30 mmol/L | Urinary sodium excretion $\geq$ 30 mmol/L | p - value        |
|------------------------------------------------------------------------------------------------------------|--------------------------------------|-------------------------------------------|------------------|
|                                                                                                            | % or IQR<br>N = 72                   | % or IQR<br>N = 73                        |                  |
| Age (median age in years (IQR))                                                                            | N = 72<br>67 (56 – 74)               | N = 73<br>69 (59 – 76)                    | p = 0.47         |
| Sex assigned at birth (N (%))                                                                              | ♂ 38 (53%)<br>♀ 34 (47%)             | ♂ 43 (59%)<br>♀ 30 (41%)                  | p = 0.51         |
| Vomiting/nausea (N (%))                                                                                    | 32 / 71 (45.1 %)                     | 19 / 67 (28.4 %)                          | p = 0.05         |
| Diarrhea (N (%))                                                                                           | 26 / 67 (38.8 %)                     | 28 / 68 (41.2 %)                          | p = 0.86         |
| Heart rate (mean HR in BPM (SD))                                                                           | N = 71<br>89.7 ( $\pm$ 16.3)         | N = 72<br>93.1 ( $\pm$ 18.9)              | p = 0.25         |
| Systolic blood pressure (mean SBP in mmHg (SD))                                                            | N = 70<br>135 ( $\pm$ 24.8)          | N = 71<br>137 ( $\pm$ 24.1)               | p = 0.68         |
| Disturbed capillary refill (N (%))                                                                         | 3 / 27 (11.1 %)                      | 4 / 31 (12.9 %)                           | p = 1.00         |
| eGFR rate using 2021 CKD-epi creatinine equation in (median clearance in ml/min/1.73 m <sup>3</sup> (IQR)) | N = 71<br>67 (49 – 90)               | N = 73<br>71 (32 – 92)                    | p = 0.49         |
| CRP (median level in mmol/L (IQR))                                                                         | N = 70<br>111 (52.5 – 163)           | N = 71<br>70 (35.0 – 154)                 | <b>p = 0.028</b> |
| LDH (median level in U/L (IQR))                                                                            | N = 57<br>351 (270 – 491)            | N = 61<br>273 (227 – 434)                 | <b>p = 0.021</b> |
| CT-severity score (median score (IQR))                                                                     | N = 33<br>11.0 (7.0 – 15.0)          | N = 40<br>12.0 (6.0 – 16.8)               | p = 0.86         |
| <b>Outcome</b>                                                                                             |                                      |                                           |                  |
| Death or palliative discharge (N (%))                                                                      | 14 / 72 (19.4%)                      | 18 / 73 (24.7 %)                          | p = 0.55         |
| ICU-admission (N (%), 'do not intubate' excluded)                                                          | 24 / 65 (36.9 %)                     | 25 / 61 (41.0 %)                          | p = 0.72         |
| Invasive ventilation (N (%)), 'do not intubate' excluded                                                   | 18 / 64 (28.1 %)                     | 23 / 60 (38.3 %)                          | p = 0.26         |

CRP = C-reactive protein; LDH = lactate dehydrogenase; CT = computed tomography; ICU = intensive care unit; eGFR = estimated glomerular filtration rate; CKD-epi = chronic kidney disease Epidemiology Collaboration; IQR = interquartile range; SD = standard deviation. Significance was assessed using a Student's t-test (for normally distributed numerical data), Mann-Whitney test (for non-normally distributed numerical data) or Chi-square test (for categorical data). p – values for all groups indicate the 2-tailed significance between the two groups.

**Supplemental Table 7** – Patient characteristics, signs and symptoms, outcome measures, and complications for each SARS-CoV-2 variant

|                                                                             | <b>Initial</b>                     | <b>Alpha</b>                     | <b>Delta</b>                     | <b>Omicron</b>                 | <b>p-value</b>                                                                                               |
|-----------------------------------------------------------------------------|------------------------------------|----------------------------------|----------------------------------|--------------------------------|--------------------------------------------------------------------------------------------------------------|
| Sex assigned at birth (N (%))                                               | ♀ 2431 (39.3 %)<br>♂ 3754 (60.7 %) | ♀ 322 (40.3 %)<br>♂ 477 (59.7 %) | ♀ 300 (42.9 %)<br>♂ 399 (57.1 %) | ♀ 52 (42.6 %)<br>♂ 70 (57.4 %) | p = 0.266                                                                                                    |
| Age (median age in years (IQR))                                             | 67 (57 – 77)                       | 63 (53 – 73)                     | 65 (52 – 77)                     | 71 (59 – 76)                   | p <0.001 for alpha vs. initial / omicron<br>p = 0.012 for alpha vs. delta<br>p = 0.006 for delta vs. initial |
| BMI (median BMI in kg/m <sup>2</sup> (IQR))                                 | 27.4 (24.3 – 31.2)                 | 27.9 (24.9 – 32.9)               | 27.7 (24.4 – 32.2)               | 26.8 (23.8 – 30.4)             | p = 0.012 for alpha vs. initial                                                                              |
| Corrected sodium level at presentation in mmol/L (IQR)                      | 136.5 (134.0 – 139.0)              | 136.0 (133.3 – 138.4)            | 136.1 (133.0 – 138.6)            | 136.1 (133.8 – 138.9)          | p <0.001 for alpha / delta vs. initial                                                                       |
| Patients with hyponatremia that presented with diarrhea or vomiting (N (%)) | 1524 / 3327 (45.8 %)               | 191 / 398 (48.0 %)               | 130 / 389 (33.4 %)               | 27 / 73 (37.0 %)               | p < 0.001 for delta vs. alpha / initial                                                                      |
| Patients with hyponatremia that used diuretics at presentation (N (%))      | 348 / 2042 (17.0 %)                | 46 / 305 (15.1 %)                | 60 / 283 (21.2 %)                | 18 / 40 (45.0 %)               | p < 0.001 for omicron vs. initial / alpha / delta                                                            |
| Patients with hyponatremia that complied to the definition of SIADH (N (%)) | 12 / 94 (12.8 %)                   | 0 / 2 (0 %)                      | 0 / 4 (0 %)                      | 0 / 0 (0 %)                    | p = 0.647                                                                                                    |
| Patients with hyponatremia of unknown etiology (N (%))                      | 939 / 2045 (45.9 %)                | 142 / 308 (46.1 %)               | 121 / 283 (42.8 %)               | 8 / 40 (20 %)                  | p = 0.009 for omicron vs. initial / alpha / delta                                                            |

BMI = body mass index; SIADH = syndrome of inappropriate antidiuretic hormone secretion; IQR = interquartile range. Significance was assessed using a Kruskal wallis test with post-hoc correction (for numerical data) or logistic regression (for categorical data). p – values for all groups indicate the 2-tailed significance between the two groups.

1  
2  
3  
4  
5  
6  
7  
8  
9  
10  
11  
12  
13  
14  
15  
16  
17  
18  
19  
20  
21  
22  
23  
24  
25  
26  
27  
28  
29  
30  
31  
32  
33  
34  
35  
36  
37  
38  
39  
40  
41  
42  
43  
44  
45  
46  
47  
48  
49  
50  
51  
52  
53  
54  
55  
56  
57  
58  
59  
60

For peer review only

**STROBE 2007 (v4) Statement—Checklist of items that should be included in reports of *cohort studies***

| Section/Topic                | Item # | Recommendation                                                                                                                                                                       | Reported on page # |
|------------------------------|--------|--------------------------------------------------------------------------------------------------------------------------------------------------------------------------------------|--------------------|
| <b>Title and abstract</b>    | 1      | (a) Indicate the study's design with a commonly used term in the title or the abstract                                                                                               | 1 and 2            |
|                              |        | (b) Provide in the abstract an informative and balanced summary of what was done and what was found                                                                                  | 2                  |
| <b>Introduction</b>          |        |                                                                                                                                                                                      |                    |
| Background/rationale         | 2      | Explain the scientific background and rationale for the investigation being reported                                                                                                 | 4                  |
| Objectives                   | 3      | State specific objectives, including any prespecified hypotheses                                                                                                                     | 5                  |
| <b>Methods</b>               |        |                                                                                                                                                                                      |                    |
| Study design                 | 4      | Present key elements of study design early in the paper                                                                                                                              | 6                  |
| Setting                      | 5      | Describe the setting, locations, and relevant dates, including periods of recruitment, exposure, follow-up, and data collection                                                      | 6                  |
| Participants                 | 6      | (a) Give the eligibility criteria, and the sources and methods of selection of participants. Describe methods of follow-up                                                           | 6                  |
|                              |        | (b) For matched studies, give matching criteria and number of exposed and unexposed                                                                                                  | -                  |
| Variables                    | 7      | Clearly define all outcomes, exposures, predictors, potential confounders, and effect modifiers. Give diagnostic criteria, if applicable                                             | 6 and 7            |
| Data sources/<br>measurement | 8*     | For each variable of interest, give sources of data and details of methods of assessment (measurement). Describe comparability of assessment methods if there is more than one group | 6 and 7            |
| Bias                         | 9      | Describe any efforts to address potential sources of bias                                                                                                                            | 7                  |
| Study size                   | 10     | Explain how the study size was arrived at                                                                                                                                            | 8                  |
| Quantitative variables       | 11     | Explain how quantitative variables were handled in the analyses. If applicable, describe which groupings were chosen and why                                                         | 6 and 7            |
| Statistical methods          | 12     | (a) Describe all statistical methods, including those used to control for confounding                                                                                                | 7                  |
|                              |        | (b) Describe any methods used to examine subgroups and interactions                                                                                                                  | 7                  |
|                              |        | (c) Explain how missing data were addressed                                                                                                                                          | 7                  |
|                              |        | (d) If applicable, explain how loss to follow-up was addressed                                                                                                                       | 7                  |
|                              |        | (e) Describe any sensitivity analyses                                                                                                                                                | -                  |
| <b>Results</b>               |        |                                                                                                                                                                                      |                    |



|                          |     |                                                                                                                                                                                                              |                       |
|--------------------------|-----|--------------------------------------------------------------------------------------------------------------------------------------------------------------------------------------------------------------|-----------------------|
| Participants             | 13* | (a) Report numbers of individuals at each stage of study—eg numbers potentially eligible, examined for eligibility, confirmed eligible, included in the study, completing follow-up, and analysed            | 8                     |
|                          |     | (b) Give reasons for non-participation at each stage                                                                                                                                                         | 8                     |
|                          |     | (c) Consider use of a flow diagram                                                                                                                                                                           | FIG 1                 |
| Descriptive data         | 14* | (a) Give characteristics of study participants (eg demographic, clinical, social) and information on exposures and potential confounders                                                                     | Table 1, p 24         |
|                          |     | (b) Indicate number of participants with missing data for each variable of interest                                                                                                                          | Table 1-4, p 24 to 29 |
|                          |     | (c) Summarise follow-up time (eg, average and total amount)                                                                                                                                                  | -                     |
| Outcome data             | 15* | Report numbers of outcome events or summary measures over time                                                                                                                                               | FIG 2                 |
| Main results             | 16  | (a) Give unadjusted estimates and, if applicable, confounder-adjusted estimates and their precision (eg, 95% confidence interval). Make clear which confounders were adjusted for and why they were included | Table 3, p 27-29      |
|                          |     | (b) Report category boundaries when continuous variables were categorized                                                                                                                                    | 6                     |
|                          |     | (c) If relevant, consider translating estimates of relative risk into absolute risk for a meaningful time period                                                                                             | -                     |
| Other analyses           | 17  | Report other analyses done—eg analyses of subgroups and interactions, and sensitivity analyses                                                                                                               | 8, 9, 11              |
| <b>Discussion</b>        |     |                                                                                                                                                                                                              |                       |
| Key results              | 18  | Summarise key results with reference to study objectives                                                                                                                                                     | 12                    |
| <b>Limitations</b>       |     |                                                                                                                                                                                                              |                       |
| Interpretation           | 20  | Give a cautious overall interpretation of results considering objectives, limitations, multiplicity of analyses, results from similar studies, and other relevant evidence                                   | 12-17                 |
| Generalisability         | 21  | Discuss the generalisability (external validity) of the study results                                                                                                                                        | 16                    |
| <b>Other information</b> |     |                                                                                                                                                                                                              |                       |
| Funding                  | 22  | Give the source of funding and the role of the funders for the present study and, if applicable, for the original study on which the present article is based                                                | 19                    |

\*Give information separately for cases and controls in case-control studies and, if applicable, for exposed and unexposed groups in cohort and cross-sectional studies.

**Note:** An Explanation and Elaboration article discusses each checklist item and gives methodological background and published examples of transparent reporting. The STROBE checklist is best used in conjunction with this article (freely available on the Web sites of PLoS Medicine at <http://www.plosmedicine.org/>, Annals of Internal Medicine at <http://www.annals.org/>, and Epidemiology at <http://www.epidem.com/>). Information on the STROBE Initiative is available at [www.strobe-statement.org](http://www.strobe-statement.org).
