# Supplementary material for: What is the aetiology of dysnatraemia in COVID-19 and how is this related to outcomes in patients admitted during earlier and later COVID-19 waves? A multicentre, retrospective observational study in 11 Dutch hospitals
Source: PubMed Central journal article supplement — BMJ Open. 2023 Nov 14;13(11):e075232. doi: 10.1136/bmjopen-2023-075232 (PMC10649520; doi:10.1136/bmjopen-2023-075232), 2023-11-14
Supplement: bmjopen-2023-075232supp001.pdf [file bmjopen-2023-075232supp001.pdf]

**What is the etiology of dysnatremia in COVID-19 and how is this related to outcomes in patients admitted during earlier and later COVID-19 waves? A multicentre, retrospective observational study in eleven Dutch hospitals**

**Supplemental information**

L.R. de Haan<sup>a, f1, \*</sup>, M. ten Wolde<sup>a</sup>, M. Beudel<sup>b</sup>, R.H. Olde Engberink<sup>c</sup>, B. Appelman<sup>c</sup>, E.K. Haspels-Hogervorst<sup>d</sup>, D. Rusch<sup>d</sup>, N.C. Gritters-van den Oever<sup>e</sup>, S. Simsek<sup>f1</sup>, N. Paternotte<sup>f2</sup>, J.P. van den Bergh<sup>g</sup>, C.E. Wyers<sup>g</sup>, M. de Kruif<sup>h1</sup>, T. Dormans<sup>h2</sup>, H. Moeniralam<sup>i</sup>, N. Bokhizzou<sup>j</sup>, K. Brinkman<sup>k</sup>, R.A. Douma<sup>a</sup>, on behalf on The Dutch COVID-PREDICT study group

<sup>a</sup> Department of Internal Medicine, Flevo Hospital, Almere, the Netherlands

<sup>b</sup> Department of Neurology, Amsterdam University Medical Centre

<sup>c</sup> Center of Experimental and Molecular Medicine (C.E.M.M.), Location Academic Medical Center, Amsterdam UMC, Amsterdam, The Netherlands.

<sup>d</sup> Intensive care department, Martini Hospital, Groningen, the Netherlands

<sup>e</sup> Intensive care department, Treant Hospitals, Hoogeveen, Emmen, and Stadskanaal, the Netherlands

<sup>f1</sup> Department of Internal Medicine, Northwest Clinics, Alkmaar, the Netherlands

<sup>f2</sup> Department of Pulmonary diseases, Northwest Clinics, Alkmaar, the Netherlands

<sup>g</sup> Department of Internal Medicine, VieCuri Medical Centre, Venlo, the Netherlands

<sup>h1</sup> Department of Pulmonary diseases, Zuyderland Medical Centre, Heerlen, the Netherlands

<sup>h2</sup> Department of Intensive Care, Zuyderland Medical Centre, Heerlen, the Netherlands

<sup>i</sup> Department of Internal Medicine, St. Antonius Hospital, Nieuwegein, the Netherlands

<sup>j</sup> Department of Internal Medicine, BovenIJ hospital, Amsterdam, the Netherlands

<sup>k</sup> Department of Internal Medicine, Onze Lieve Vrouwe Gasthuis, Amsterdam, the Netherlands

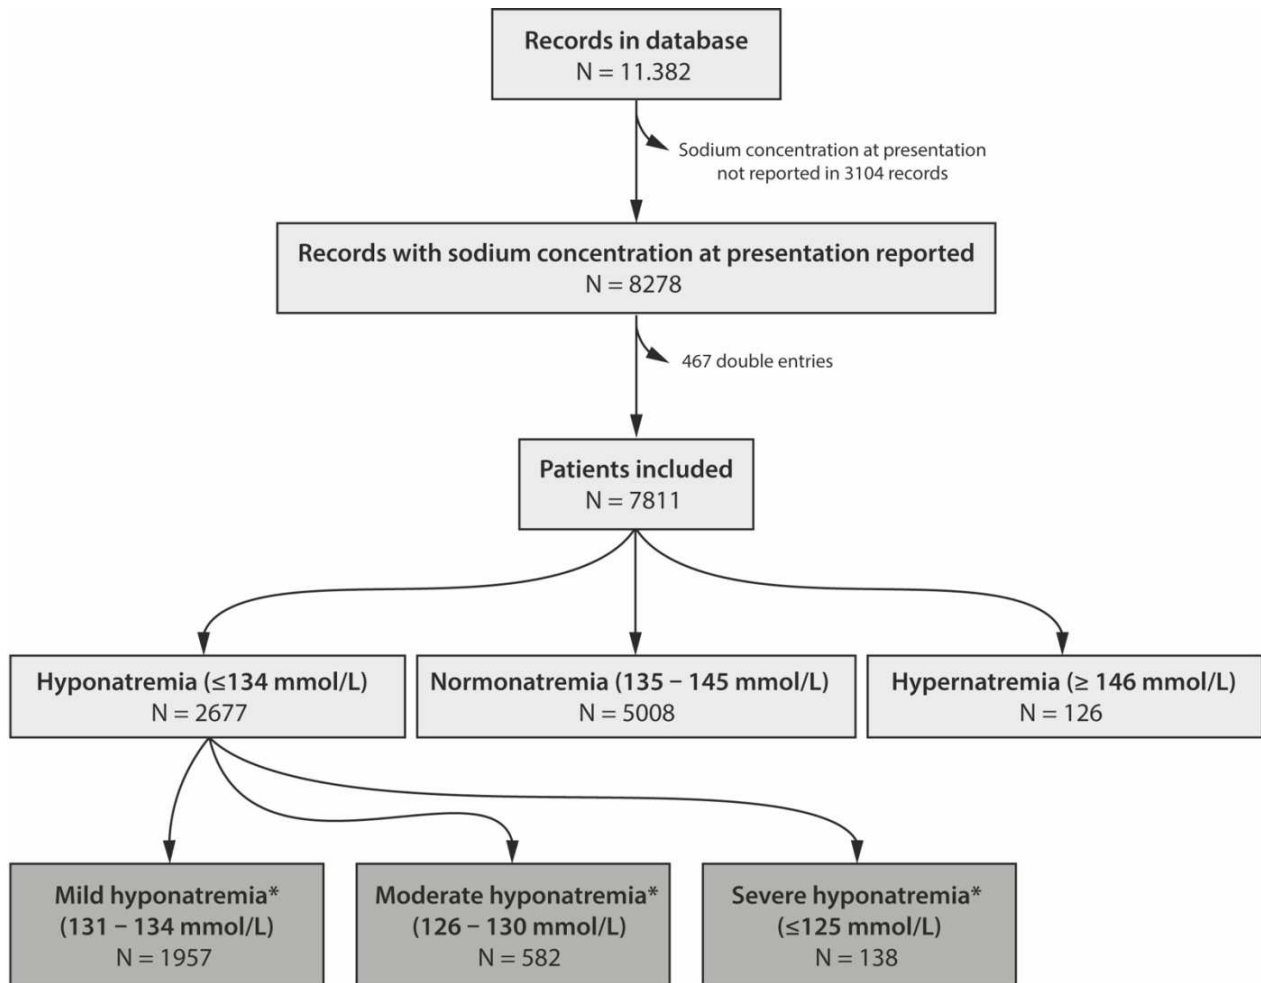

**Supplemental Figure 1.** Flow chart of included patients. Sodium concentrations indicate corrected serum sodium concentrations at hospital presentation \* indicates the subgroup analysis as provided in the supplemental information.

**Supplemental Table 1** – Subgroup analysis of patient characteristics

|                                                     | Na 135 – 145 mmol/L<br>N = 5008    | Na ≤134 mmol/L<br>N = 2677          | Na 131 – 134 mmol/L<br>N = 1957     | Na 126 – 130 mmol/L<br>N = 582    | Na ≤125 mmol/L<br>N = 138        |
|-----------------------------------------------------|------------------------------------|-------------------------------------|-------------------------------------|-----------------------------------|----------------------------------|
| Sex assigned at birth (N (%))                       | ♂ 2946 (58.8 %)<br>♀ 2060 (41.2 %) | ♂ 1673 (62.5%) **<br>♀ 1003 (37.5%) | ♂ 1249 (63.9%) ***<br>♀ 707 (36.1%) | ♂ 363 (62.4%)<br>♀ 219 (37.6%)    | ♂ 61 (44.2%) ***<br>♀ 77 (55.8%) |
| Age (median age in years (IQR))                     | N = 5008<br>66.1 (55.0-76.0)       | N = 2675<br>67.0 (58.0-77.0) **     | N = 1956<br>67.0 (57.0 – 76.0)      | N = 581<br>68.1 (60.0 – 78.0) *** | N =138<br>70.6 (62.0 – 79.3) *** |
| BMI (median BMI in kg/m <sup>2</sup> (IQR))         | N = 3374<br>27.7 (24.6 – 31.6)     | N = 1740<br>27.2 (24.2 – 31.1) **   | N = 1271<br>27.4 (24.4 – 31.5)      | N = 379<br>26.3 (23.4 – 30.3) *** | N = 90<br>26.9 (23.7 – 30.9)     |
| Order ‘Do not intubate’ (N (%))                     | 796 / 2469 (32.2 %)                | 440 / 1442 (30.5 %)                 | 304 / 1043 (29.1 %)                 | 108 / 322 (33.5 %)                | 28 / 77 (36.4 %)                 |
| Sodium (mean corrected serum level in mmol/L (IQR)) | 138.02 (136.42 – 140.0)            | 132.59 (130.72 – 134.00) ***        | 133.3 (132.28 – 134.19) ***         | 129.42 (128.04 – 130.22) ***      | 123.94 (121.17 – 125.0) ***      |
| Chronic cardiac disease (N (%))                     | 1334 / 4982 (26.8 %)               | 760 / 2666 (28.5%)                  | 541 / 1948 (27.8 %)                 | 187 / 581 (32.2 %)                | 32 / 137 (23.4 %)                |
| Hypertension (N (%))                                | 1889 / 4586 (41.2 %)               | 1055 / 2374 (44.4 %) **             | 749 / 1735 (43.2 %)                 | 240 / 520 (46.2 %)                | 66 / 119 (55.5 %) **             |
| Chronic pulmonary disease (N (%))                   | 844 / 4979 (17.0 %)                | 466 / 2662 (17.5 %)                 | 328 / 1945 (16.9 %)                 | 111 / 580 (19.1 %)                | 27 / 137 (19.7 %)                |
| Chronic kidney disease (N (%))                      | 491 / 4587 (10.7 %)                | 329 / 2379 (13.8 %) ***             | 220 / 1738 (12.7 %)                 | 92 / 522 (17.6 %) ***             | 17 / 119 (14.3 %)                |
| Moderate to severe liver disease (N (%))            | 50 / 4972 (1.0 %)                  | 30 / 2662 (1.1%)                    | 25 / 1947 (1.3%)                    | 3 / 579 (0.5 %)                   | 2 / 136 (1.5%)                   |
| Diabetes (N (%))                                    | 1261 / 4972 (25.4 %)               | 664 / 2662 (24.9 %)                 | 481 / 1946 (24.7 %)                 | 148 / 579 (25.6 %)                | 35 / 137 (25.5 %)                |
| Immunosuppressives (N (%))                          | 295 / 4445 (6.6 %)                 | 192 / 2283 (8.4 %) **               | 129 / 1669 (7.7 %)                  | 56 / 497 (11.3 %) **              | 7 / 117 (6.0 %)                  |
| Thiazide diuretics (N (%))                          | 394 / 4994 (7.9 %)                 | 258 / 2671 (9.7 %) **               | 186 / 1953 (9.5 %)                  | 55 / 580 (9.5 %)                  | 17 / 138 (12.3 %)                |
| Loop diuretics (N (%))                              | 389 / 4994 (7.8 %)                 | 187 / 2671 (7.0 %)                  | 128 / 1953 (6.6 %)                  | 50 / 580 (8.6 %)                  | 9 / 138 (6.5 %)                  |
| SSRIs (N (%))                                       | 164 / 4994 (3.3 %)                 | 78 / 2671 (2.9 %)                   | 53 / 1953 (2.7%)                    | 15 / 580 (2.6%)                   | 10 / 138 (7.2 %)                 |

BMI = body mass index; IQR = interquartile range; % = percentage of patients in this group with indicated characteristic; SSRI = Selective Serotonin Reuptake inhibitor. SNRI = Selective Serotonin and Noradrenalin Reuptake inhibitor. Significance was assessed using a Kruskal-Wallis test with post-hoc correction (for numerical data; non-normally distributed) or Chi-square test (for categorical data). p – values for all groups indicate the adjusted significance after post-hoc correction when compared to the normonatremia group. \* Indicates a p-value <0.05, \*\* indicates a p-value <0.01, \*\*\* indicates a p-value <0.001



**Supplemental Table 2** – Definitions for comorbidities

| Comorbidity                      | Included diseases                                                                                                                                                                                                                                                                                                                                                                                                                                                                                                                                                                                                                                                                                                                                                                                                                                                                                              |
|----------------------------------|----------------------------------------------------------------------------------------------------------------------------------------------------------------------------------------------------------------------------------------------------------------------------------------------------------------------------------------------------------------------------------------------------------------------------------------------------------------------------------------------------------------------------------------------------------------------------------------------------------------------------------------------------------------------------------------------------------------------------------------------------------------------------------------------------------------------------------------------------------------------------------------------------------------|
| Chronic pulmonary disease        | Alpha-1 trypsin deficiency; asbestosis; cryptogenic organizing pneumonia; lymphangioleiomyomatosis; lung disease immuno-deficiency and chromosome breakage syndrome; bronchopulmonary dysplasia; primary ciliary dyskinesia; bronchiectasis; cystic fibrosis; chronic bronchitis or emphysema; lung fibrosis; sarcoidosis; obstructive sleep apnea; pulmonary hypertension                                                                                                                                                                                                                                                                                                                                                                                                                                                                                                                                     |
| Chronic cardiac disease          | <b>Chronical heart disease:</b> Myocardial infarction; Cardiac arrhythmias (AVNRT, atrial fibrillation, (supra)ventricular tachycardia, ventricular tachycardia, brugada syndrome, sick sinus syndrome, wolf parkinson white syndrome; decompensated heart failure, cardiomyopathy; valve disease (aortic valve stenosis, aortic valve insufficiency<br><b>Congential heart disease:</b> aortic valve insufficiency or aortic valve stenosis; Atrial septal defect or ventricular septal defect; hypoplastic left heart syndrome; Ebstein's anomaly; patent ductus arteriosus; tetralogy of Fallot; transposition of the great vessels                                                                                                                                                                                                                                                                         |
| Chronic kidney disease           | Acute tubulointerstitial nephritis; hemolytic uremic syndrome (HUS); amyloidosis; Anti-glomerular basement membrane disease; bartter syndrome; kidney damage due to medication, chronic bladder infections / kidney infections / diabetes, high blood pressure, arteriosclerosis; cryoglobulinemia, renal cystic disease; cystinosis; dense deposit disease (DDD); Focal segmental glomerulosclerosis (FSGS); Gitelman syndrome; glomerulonephritis; HNF1beta associated kidney disease; renal fusion (horseshoe kidney); IgA nephropathy; medullary sponge kidney; membranous nephropathy; minimal change disease; solitary kidney; Nail-patella syndrome (NPS); nephrogenic diabetes insipidus; nephroptosis; nephrotic syndrome; renal angioliopoma; renal cell carcinoma; primary hyperoxaluria; reflux nephropathy; atrophic kidney; scleroderma; lupus nephritis; Alport's syndrome; systemic vasculitis |
| Moderate to severe liver disease | Liver disease that caused cirrhosis (e.g. Budd Chiari, hemochromatosis, hepatitis, Wilson's disease)                                                                                                                                                                                                                                                                                                                                                                                                                                                                                                                                                                                                                                                                                                                                                                                                           |

Supplemental Table 3 – Subgroup analysis of signs and symptoms

| Signs and symptoms                                                                                         | Na 135 – 145 mmol/L<br>N = 3206 | Na ≤134 mmol/L<br>N = 1821        | Na 131 – 134 mmol/L<br>N = 1346   | Na 126 – 130 mmol/L<br>N = 383  | Na ≤125 mmol/L<br>N = 92     |
|------------------------------------------------------------------------------------------------------------|---------------------------------|-----------------------------------|-----------------------------------|---------------------------------|------------------------------|
| Nausea / vomiting (N (%))                                                                                  | 1150 / 4129 (27.9 %)            | 679 / 2273 (29.9 %)               | 490 / 1663 (29.5 %)               | 151 / 499 (30.3 %)              | 38 / 111 (34.2%)             |
| Diarrhea (N (%))                                                                                           | 1146 / 4157 (27.6 %)            | 804 / 2298 (35.0%) ***            | 574 / 1686 (34.0 %) ***           | 180 / 501 (35.9%) ***           | 50 / 111 (45.0 %) ***        |
| Anosmia (N (%))                                                                                            | 352 / 3330 (10.6 %)             | 244 / 1904 (12.8 %)**             | 174 / 1395 (12.5 %)               | 62 / 420 (14.8 %)               | 8 / 89 (9.0 %)               |
| Confusion (N (%))                                                                                          | 651 / 4381 (14.9 %)             | 311 / 2319 (13.4%)                | 207 / 1688 (12.3 %)               | 78 / 511 (15.3 %)               | 26 / 120 (21.7 %)            |
| Seizures (N (%))                                                                                           | 31 / 3452 (0.9 %)               | 10 / 1977 (0.5%)                  | 6 / 1448 (0.4 %)                  | 2 / 434 (0.5 %)                 | 2 / 95 (2.1 %)               |
| FiO2 (median fraction (IQR))                                                                               | N = 2084<br>0.36 (0.28 – 0.50)  | N = 1159<br>0.36 (0.28 – 0.50)    | N = 848<br>0.36 (0.28 – 0.48)     | N = 258<br>0.36 (0.32 – 0.60)   | N = 53<br>0.36 (0.31 – 0.75) |
| SBP (mean SBP in mmHg (SD))                                                                                | N = 2648<br>132 (± 22)          | N = 4971<br>135 (±23)***          | N = 1934<br>132 (±22) ***         | N = 578<br>132 (±22)**          | N = 136<br>138 (±27)         |
| HR (mean HR in BPM (SD))                                                                                   | N = 4965<br>91 (±20)            | N = 2661<br>92 (±18) **           | N = 1946<br>92 (±18) *            | N = 580<br>92 (±18)             | N = 135<br>90 (±19)          |
| Disturbed capillary refill (N (%))                                                                         | 93 / 1369 (6.8 %)               | 81 / 863 (9.4 %)                  | 51 / 614 (8.3 %)                  | 27 / 206 (13.1 %)               | 3 / 43 (7.0 %)               |
| Blood urea level (median level in mmol/L (IQR))                                                            | N = 4776<br>6.2 (4.5 – 9.2)     | N = 2549<br>6.3 (4.5 – 9.3)       | N = 1892<br>6.3 (4.6 – 9.1)       | N = 559<br>6.2 (4.5 – 10.2)     | N = 128<br>5.5 (4.2 – 9.8)   |
| eGFR rate using 2021 CKD-epi creatinine equation in (median clearance in ml/min/1.73 m <sup>3</sup> (IQR)) | N = 4983<br>68 (46 – 94)        | N = 2656<br>64 (45 – 90) ***      | N = 1944<br>64 (46 – 89) ***      | N = 575<br>63 (41 – 90) ***     | N = 137<br>79 (46 – 92)      |
| CT-severity score (mean score (SD))                                                                        | N = 1401<br>12.1 (±5.6)         | N = 909<br>12.4 (±5.5)            | N = 684<br>12.3 (±5.4)            | N = 190<br>12.6 (±5.4)          | N = 35<br>12.5 (±6.7)        |
| Blood CRP level (median level in mg/L (IQR))                                                               | N = 4939<br>70.8 (28.0 – 131)   | N = 2646<br>93.1 (49.0 – 154) *** | N = 1933<br>93.0 (48.2 – 151) *** | N = 577<br>103 (54.6 – 166) *** | N = 136<br>82.5 (36.0 – 145) |
| Blood LDH level (median level in U/L (IQR))                                                                | N = 4226<br>323 (247 – 426)     | N = 2238<br>349 (268 – 471) ***   | N = 1651<br>346 (269 – 467) ***   | N = 479<br>361 (269 – 482) ***  | N = 108<br>331 (240 – 543)   |
| Modified early warning score (MEWS) (median score (IQR))                                                   | N = 4055<br>3.0 (2.0 – 4.0)     | N = 2337<br>3.0 (2.0 – 4.0) ***   | N = 1709<br>3.0 (2.0 – 4.0) ***   | N = 509<br>3.0 (2.0 – 4.0)      | N = 119<br>3.0 (2.0 – 4.0)   |
| Quick sequential organ failure assessment (median score (IQR))                                             | N = 4131<br>1.0 (0.0 – 1.0)     | N = 2373<br>(0.0 – 1.0)           | N = 1735<br>1.0 (0.0 – 1.0)       | N = 517<br>1.0 (0.0 – 1.0)      | N = 121<br>1.0 (0.0 – 1.0)   |

SBP = systolic blood pressure; HR = heart rate; CKD-epi = chronic kidney disease Epidemiology Collaboration BPM = beats per minute; IQR = interquartile range; SD = standard deviation; CRP = c-reactive protein; LDH = lactate dehydrogenase; % = percentage of patients in this group with indicated characteristic. Significance was assessed using a Kruskal wallis test with post-hoc correction (for numerical data) or Chi-square test (for categorical data). \* Indicates a p-value <0.05, \*\* indicates a p-value <0.01, \*\*\* indicates a p-value <0.001

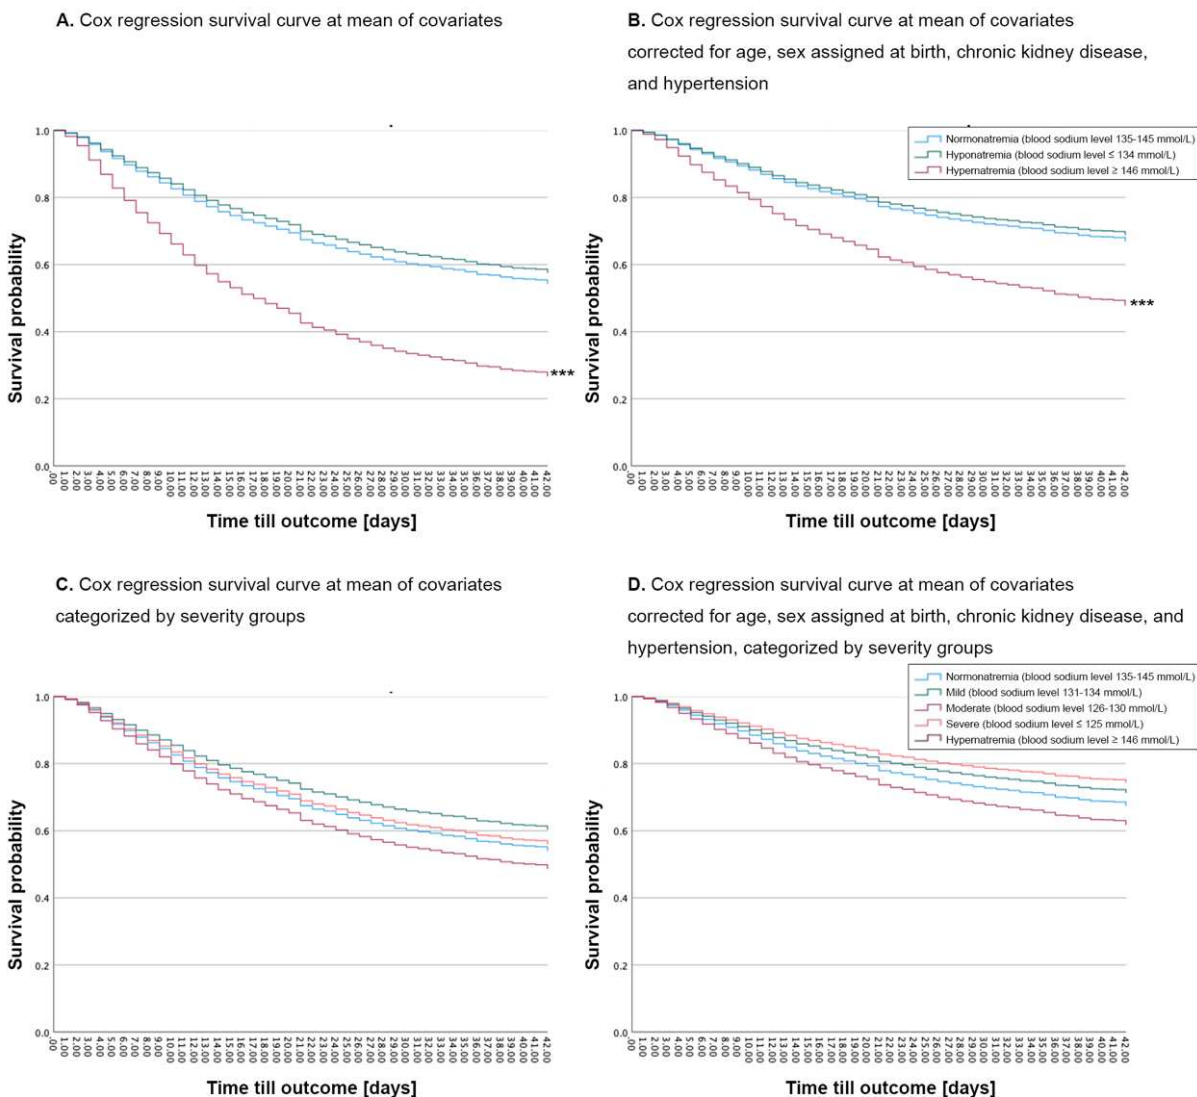

**Supplemental Figure 2.** Cox proportional survival curves at the mean of covariates for (A) unadjusted 6-week mortality categorized by normo-, hypo-, and hypernatremia, (B) 6-week mortality adjusted for age, sex assigned at birth, a history of chronic kidney disease, and a history of hypertension stratified in normo-, hypo-, and hypernatremia, (C) unadjusted 6-week mortality stratified in normo- and hypernatremia and mild, moderate, and severe hyponatremia, and (D) 6-week mortality adjusted for age, sex assigned at birth, a history of chronic kidney disease, and a history of hypertension stratified in normo- and hypernatremia and mild, moderate, and severe hyponatremia. \* Indicates a p-value <0.05, \*\*\* indicates a p-value <0.001

**Supplemental Table 4** – Subgroup analysis of outcome and complications

| Outcome                                                                       | Na 135 – 145 mmol/L<br>N = 3206 | Na ≤134 mmol/L<br>N = 1821                                              | Na 131 – 134 mmol/L<br>N = 1346                                | Na 126 – 130 mmol/L<br>N = 383                                 | Na ≤125 mmol/L<br>N = 92                                   |
|-------------------------------------------------------------------------------|---------------------------------|-------------------------------------------------------------------------|----------------------------------------------------------------|----------------------------------------------------------------|------------------------------------------------------------|
| Duration of admission (median days (IQR))                                     | N = 4116<br>7 (3 – 14)          | N = 2372<br>7 (4 – 16) ***                                              | N = 1735<br>7 (4 – 15) **                                      | N = 514<br>8 (4 – 18)*                                         | N123<br>8 (3 – 18)                                         |
| Death or palliative discharge (N (%))                                         | 729 / 4568 (16.0 %)             | 405 / 2360 (17.2 %)<br><sup>A</sup> OR 1.042 (0.906 – 1.200)            | 269 / 1723 (15.6 %)                                            | 115 / 518 (22.2 %)                                             | 21 / 119 (17.6 %)                                          |
| ICU-admission (N (%), 'do not intubate' excluded)                             | 710 / 3778 (18.8 %)             | 439 / 1923 (22.8 %)<br><sup>A</sup> OR 1.274 (1.112 – 1.458)***         | 314 / 1422 (22.1 %)<br><sup>A</sup> OR 1.205 (1.036 – 1.401)*  | 104 / 410 (25.4 %)<br><sup>A</sup> OR 1.487 (1.170 – 1.889)*** | 21 / 91 (23.1 %)<br><sup>A</sup> OR 1.431 (0.868 – 2.360)  |
| Duration of ICU-admission (days (IQR))<br>'do not intubate' excluded          | N = 437<br>10 (4 – 19)          | N = 299<br>8 (3 - 19)<br>p = 0.356                                      | N = 215<br>8 (3 – 20)                                          | N = 68<br>8 (4 – 18)                                           | N = 16<br>9 (4 – 21)                                       |
| Invasive ventilation (N (%)),<br>'do not intubate' excluded                   | 623 / 3706 (16.8 %)             | 352 / 1889 (18.6 %)<br><sup>A</sup> OR 1.122 (0.970 – 1.298)            | 250 / 1396 (17.9 %)                                            | 85 / 402 (21.1 %)                                              | 17 / 91 (18.7 %)                                           |
| Discharge alive within 42 days; N indicating the number of non-censored cases | N = 2747                        | N = 1527<br><sup>A</sup> HR 0.955 (0.897 – 1.017)<br>p = 0.154          | N = 1153                                                       | N = 302                                                        | N = 72                                                     |
| Use of tocilizumab, sarilumab, or anakinra (N (%))                            | 199 / 1245 (16.0%)              | 134 / 688 (19.5%)<br><sup>A</sup> OR 1.256 (0.984 – 1.604)<br>p = 0.068 | 91 / 480 (19.0 %)                                              | 36 / 169 (21.3 %)                                              | 7 / 39 (17.9%)                                             |
| Complications                                                                 | Na 135 – 145 mmol/L<br>N = 3206 | Na ≤134 mmol/L<br>N = 1821                                              | Na 131 – 134 mmol/L<br>N = 1346                                | Na 126 – 130 mmol/L<br>N = 383                                 | Na ≤125 mmol/L<br>N = 92                                   |
| Bacterial pneumonia (N (%))                                                   | 501 / 4307 (11.6 %)             | 289 / 2212 (13.1 %)<br><sup>A</sup> OR 1.123 (0.962 – 1.312)            | 207 / 1619 (12.8 %)                                            | 72 / 483 (14.9 %)                                              | 10 / 110 (9.1 %)                                           |
| Aspergillosis pneumonia (N (%))                                               | 83 / 3456 (2.4 %)               | 67 / 1915 (3.5 %)<br><sup>A</sup> OR 1.436 (1.034 – 1.993)              | 49 / 1402 (3.5 %)<br><sup>A</sup> OR 1.426 (0.995 – 2.044)     | 14 / 417 (3.4 %)<br><sup>A</sup> OR 1.352 (0.759 – 2.410)      | 4 / 96 (4.2 %)<br><sup>A</sup> OR 1.839 (0.657 – 5.148)    |
| ARDS (N (%))                                                                  | 404 / 4323 (9.3 %)              | 224 / 2223 (10.1 %)<br><sup>A</sup> OR 1.081 (0.909 – 1.286)            | 161 / 1627 (9.9 %)                                             | 52 / 486 (10.7 %)                                              | 11 / 110 (10.0 %)                                          |
| Treatment for septic shock (N (%)) &                                          | 135 / 4175 (3.2 %)              | 94 / 2153 (4.4 %)<br><sup>A</sup> OR 1.326 (1.013 – 1.737)*             | 66 / 1570 (4.2 %)<br><sup>A</sup> OR 1.274 (0.943 – 1.721)     | 25 / 478 (5.2 %)<br><sup>A</sup> OR 1.570 (1.012 – 2.438)*     | 3 / 105 (2.9%)<br><sup>A</sup> OR 0.920 (0.287 – 2.946)    |
| Congestive heart failure (N (%))                                              | 125 / 4352 (2.9 %)              | 64 / 2235 (2.9 %)<br><sup>A</sup> OR 0.946 (0.696 – 1.287)              | 34 / 1637 (2.1%)                                               | 23 / 488 (4.7 %)                                               | 7 / 110 (6.4 %)                                            |
| Physical decline (N (%))                                                      | 950 / 4126 (23.0 %)             | 576 / 2116 (27.2 %)<br><sup>A</sup> OR 1.221 (1.082 – 1.377)**          | 414 / 1544 (26.8 %)<br><sup>A</sup> OR 1.206 (1.054 – 1.380)** | 136 / 468 (29.1 %)<br><sup>A</sup> OR 1.303 (1.053 – 1.614)*   | 26 / 104 (25.0 %)<br><sup>A</sup> OR 1.059 (0.674 – 1.666) |



|                  |                     |                                                  |                     |                   |                   |
|------------------|---------------------|--------------------------------------------------|---------------------|-------------------|-------------------|
| Delirium (N (%)) | 451 / 4146 (10.5 %) | 237 / 2136 (11.1 %)<br>^OR 0.987 (0.833 - 1.170) | 157 / 1557 (10.1 %) | 62 / 474 (13.1 %) | 18 / 105 (17.1 %) |
|------------------|---------------------|--------------------------------------------------|---------------------|-------------------|-------------------|

ICU = Intensive care unit; ARDS = acute respiratory distress syndrome; OR = odds ratio; ^OR = adjusted odds ratio; odds ratio corrected for sex assigned at birth and age; IQR = interquartile range.

<sup>#</sup>Uncorrected for sex assigned at birth and age & Treatment for septic shock was defined as the need for vasopressors in order to maintain mean arterial blood pressure >65 mmHg and blood lactate level >2 mmol/L, in the absence of other causes including hypovolemia. Significance was assessed using a Kruskal wallis test with post-hoc correction (time to discharge alive) or logistic regression (all other values). \*

Indicates a p-value <0.05, \*\* indicates a p-value <0.01, \*\*\* indicates a p-value <0.001

**Supplemental Table 5** – Characteristics of patients with the order ‘do not intubate’

|                                                        | Order ‘do not intubate’                        | No order ‘do not intubate’                       | p-value   |
|--------------------------------------------------------|------------------------------------------------|--------------------------------------------------|-----------|
| Sex assigned at birth (N (%))                          | ♀ 531 / 1576 (33.7 %)<br>♂ 743 / 2388 (31.1 %) | ♀ 1045 / 1576 (66.3 %)<br>♂ 1645 / 2388 (68.9 %) | p = 0.095 |
| Age (median age in years (IQR))                        | 79 (73 – 84)                                   | 62 (53 -71)                                      | p < 0.001 |
| BMI (median BMI in kg/m <sup>2</sup> (IQR))            | 26.2 (23.1 – 30.1)                             | 27.9 (25.0 – 31.9)                               | p < 0.001 |
| Corrected sodium level at presentation in mmol/L (IQR) | 135.9 (± 4.5)                                  | 136.6 (±5.1)                                     | p < 0.001 |
| ICU admission (N (%))                                  | 83 / 1275 (6.5 %)                              | 781 / 2690 (29 %)                                | p < 0.001 |
| Chronic pulmonary disease (N (%))                      | 361 / 1270 (28.4 %)                            | 359 / 2680 (13.4%)                               | p < 0.001 |
| <i>Asthma (N (%))</i>                                  | 95 / 1269 (7.5 %)                              | 256 / 2678 (9.6%)                                | p = 0.036 |
| <i>Chronic obstructive pulmonary disease (N (%))</i>   | 125 / 267 (46.8 %)                             | 80 / 293 (27.3 %)                                | p < 0.001 |
| Chronic kidney disease (N (%))                         | 259 / 1270 (20.4 %)                            | 250 / 2681 (9.3%)                                | p < 0.001 |
| Chronic cardiac disease (N (%))                        | 637 / 1266 (50.3 %)                            | 564 / 2683 (21.0%)                               | p < 0.001 |
| Hypertension (N (%))                                   | 755 / 1270 (59.4 %)                            | 1051 / 2685 (39.1 %)                             | p < 0.001 |
| Moderate to severe liver disease (N (%))               | 21 / 1267 (1.7 %)                              | 28 / 2680 (1.0 %)                                | p = 0.123 |
| Diabetes (N (%))                                       | 457 / 1270 (36.0 %)                            | 679 / 2680 (25.3 %)                              | p < 0.001 |
| Neoplasm (N (%))                                       | 156 / 1273 (12.3 %)                            | 130 / 2682 (4.8 %)                               | p < 0.001 |

*BMI = Body Mass Index; IQR = interquartile range. Significance was assessed using a Student’s t-test (for normally distributed numerical data), Mann-Whitney test (for non-normally distributed numerical data) or Chi-square test (for categorical data). p – values for all groups indicate the 2-tailed significance between the two groups.*

**Supplemental Table 6** – Patient characteristics, signs and symptoms, outcome measures, and complications of patients with hyponatremia ( $\text{Na} \leq 134$  mmol/L) that did not use diuretics stratified based on their urinary sodium excretion.

| Patient characteristics                                                                                    | Urinary sodium excretion < 30 mmol/L | Urinary sodium excretion $\geq$ 30 mmol/L | p - value        |
|------------------------------------------------------------------------------------------------------------|--------------------------------------|-------------------------------------------|------------------|
|                                                                                                            | % or IQR<br>N = 72                   | % or IQR<br>N = 73                        |                  |
| Age (median age in years (IQR))                                                                            | N = 72<br>67 (56 – 74)               | N = 73<br>69 (59 – 76)                    | p = 0.47         |
| Sex assigned at birth (N (%))                                                                              | ♂ 38 (53%)<br>♀ 34 (47%)             | ♂ 43 (59%)<br>♀ 30 (41%)                  | p = 0.51         |
| Vomiting/nausea (N (%))                                                                                    | 32 / 71 (45.1 %)                     | 19 / 67 (28.4 %)                          | p = 0.05         |
| Diarrhea (N (%))                                                                                           | 26 / 67 (38.8 %)                     | 28 / 68 (41.2 %)                          | p = 0.86         |
| Heart rate (mean HR in BPM (SD))                                                                           | N = 71<br>89.7 ( $\pm$ 16.3)         | N = 72<br>93.1 ( $\pm$ 18.9)              | p = 0.25         |
| Systolic blood pressure (mean SBP in mmHg (SD))                                                            | N = 70<br>135 ( $\pm$ 24.8)          | N = 71<br>137 ( $\pm$ 24.1)               | p = 0.68         |
| Disturbed capillary refill (N (%))                                                                         | 3 / 27 (11.1 %)                      | 4 / 31 (12.9 %)                           | p = 1.00         |
| eGFR rate using 2021 CKD-epi creatinine equation in (median clearance in ml/min/1.73 m <sup>2</sup> (IQR)) | N = 71<br>67 (49 – 90)               | N = 73<br>71 (32 – 92)                    | p = 0.49         |
| CRP (median level in mmol/L (IQR))                                                                         | N = 70<br>111 (52.5 – 163)           | N = 71<br>70 (35.0 – 154)                 | <b>p = 0.028</b> |
| LDH (median level in U/L (IQR))                                                                            | N = 57<br>351 (270 – 491)            | N = 61<br>273 (227 – 434)                 | <b>p = 0.021</b> |
| CT-severity score (median score (IQR))                                                                     | N = 33<br>11.0 (7.0 – 15.0)          | N = 40<br>12.0 (6.0 – 16.8)               | p = 0.86         |
| <b>Outcome</b>                                                                                             |                                      |                                           |                  |
| Death or palliative discharge (N (%))                                                                      | 14 / 72 (19.4%)                      | 18 / 73 (24.7 %)                          | p = 0.55         |
| ICU-admission (N (%), 'do not intubate' excluded)                                                          | 24 / 65 (36.9 %)                     | 25 / 61 (41.0 %)                          | p = 0.72         |
| Invasive ventilation (N (%)), 'do not intubate' excluded                                                   | 18 / 64 (28.1 %)                     | 23 / 60 (38.3 %)                          | p = 0.26         |

CRP = C-reactive protein; LDH = lactate dehydrogenase; CT = computed tomography; ICU = intensive care unit; eGFR = estimated glomerular filtration rate; CKD-epi = chronic kidney disease Epidemiology Collaboration; IQR = interquartile range; SD = standard deviation. Significance was assessed using a Student's t-test (for normally distributed numerical data), Mann-Whitney test (for non-normally distributed numerical data) or Chi-square test (for categorical data). p – values for all groups indicate the 2-tailed significance between the two groups.

**Supplemental Table 7** – Patient characteristics, signs and symptoms, outcome measures, and complications for each SARS-CoV-2 variant

|                                                                             | <b>Initial</b>                     | <b>Alpha</b>                     | <b>Delta</b>                     | <b>Omicron</b>                 | <b>p-value</b>                                                                                                |
|-----------------------------------------------------------------------------|------------------------------------|----------------------------------|----------------------------------|--------------------------------|---------------------------------------------------------------------------------------------------------------|
| Sex assigned at birth (N (%))                                               | ♀ 2431 (39.3 %)<br>♂ 3754 (60.7 %) | ♀ 322 (40.3 %)<br>♂ 477 (59.7 %) | ♀ 300 (42.9 %)<br>♂ 399 (57.1 %) | ♀ 52 (42.6 %)<br>♂ 70 (57.4 %) | p = 0.266                                                                                                     |
| Age (median age in years (IQR))                                             | 67 (57 – 77)                       | 63 (53 – 73)                     | 65 (52 – 77)                     | 71 (59 – 76)                   | p < 0.001 for alpha vs. initial / omicron<br>p = 0.012 for alpha vs. delta<br>p = 0.006 for delta vs. initial |
| BMI (median BMI in kg/m <sup>2</sup> (IQR))                                 | 27.4 (24.3 – 31.2)                 | 27.9 (24.9 – 32.9)               | 27.7 (24.4 – 32.2)               | 26.8 (23.8 – 30.4)             | p = 0.012 for alpha vs. initial                                                                               |
| Corrected sodium level at presentation in mmol/L (IQR)                      | 136.5 (134.0 – 139.0)              | 136.0 (133.3 – 138.4)            | 136.1 (133.0 – 138.6)            | 136.1 (133.8 – 138.9)          | p < 0.001 for alpha / delta vs. initial                                                                       |
| Patients with hyponatremia that presented with diarrhea or vomiting (N (%)) | 1524 / 3327 (45.8 %)               | 191 / 398 (48.0 %)               | 130 / 389 (33.4 %)               | 27 / 73 (37.0 %)               | p < 0.001 for delta vs. alpha / initial                                                                       |
| Patients with hyponatremia that used diuretics at presentation (N (%))      | 348 / 2042 (17.0 %)                | 46 / 305 (15.1 %)                | 60 / 283 (21.2 %)                | 18 / 40 (45.0 %)               | p < 0.001 for omicron vs. initial / alpha / delta                                                             |
| Patients with hyponatremia that complied to the definition of SIADH (N (%)) | 12 / 94 (12.8 %)                   | 0 / 2 (0 %)                      | 0 / 4 (0 %)                      | 0 / 0 (0 %)                    | p = 0.647                                                                                                     |
| Patients with hyponatremia of unknown etiology (N (%))                      | 939 / 2045 (45.9 %)                | 142 / 308 (46.1 %)               | 121 / 283 (42.8 %)               | 8 / 40 (20 %)                  | p = 0.009 for omicron vs. initial / alpha / delta                                                             |

BMI = body mass index; SIADH = syndrome of inappropriate antidiuretic hormone secretion; IQR = interquartile range. Significance was assessed using a Kruskal wallis test with post-hoc correction (for numerical data) or logistic regression (for categorical data). p – values for all groups indicate the 2-tailed significance between the two groups.
